# Supplementary material for: Synthesis of multifunctional metal–organic frameworks and tuning the functionalities with pendant ligands
Source: Royal Society of Chemistry journal article supplement (doi:10.1039/d0dt03012k), 2020-01-01
Supplement: d0dt03012k1.pdf [file d0dt03012k1.pdf]

## **Supporting Information**

# **Synthesis of Multifunctional Metal-Organic Frameworks and Tuning the Functionalities by Organic Pendant of Ligand**

**Thazhe Kootteri Prasad,<sup>a,b</sup> and Myunghyun Paik Suh<sup>\*a</sup>**

<sup>a</sup>Dr. T. K. Prasad and Prof. M. P. Suh  
Department of Chemistry, Seoul National University  
1 Gwanak-ro, Gwanak-gu, Seoul 08826, Republic of Korea  
E-mail: [mpsuh@snu.ac.kr](mailto:mpsuh@snu.ac.kr)

<sup>b</sup>Dr. T. K. Prasad's current address: Centre for Chemical Biology and Therapeutics,  
Institute for Stem Cell Science and Regenerative Medicine, Bellary Road, Bangalore  
560 065, India

## Experimental Section

### A. Synthesis of ligands

#### Synthesis of 3-amino-4-(2-carboxyvinyl)benzoic acid (H<sub>2</sub>CVB-NH<sub>2</sub>)

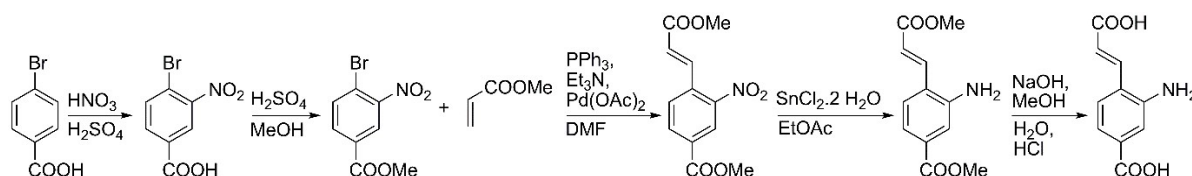

**Scheme S1.** Preparation of 3-amino-4-(2-carboxyvinyl)benzoic acid.

(a) *4-bromo-3-nitrobenzoic acid*: 4-Bromobenzoic acid (10.00 g, 49.75 mmol) was slowly added in small portions (in about 1 h) to a mixture of fuming HNO<sub>3</sub> (3.4 mL, 93 %) and concentrated H<sub>2</sub>SO<sub>4</sub> (120 mL) at 0 °C. The resulting mixture was further stirred at RT for 2 h. The clear solution was then poured over ice; the precipitate formed was filtered and washed with a copious amount of water. The product was dried under vacuum at 80 °C and used without further purification. Yield: 11.80 g (96 %). <sup>1</sup>H NMR (300 MHz, d<sub>6</sub>-DMSO, 25 °C): δ=8.43 (s, 1H; Ar-H), 8.05 ppm (m, 2H; Ar-H).

(b) *methyl 4-bromo-3-nitrobenzoate*: 4-bromo-3-nitrobenzoic acid (11.80 g, 47.96 mmol) was suspended in methanol (200 mL), to which concentrated H<sub>2</sub>SO<sub>4</sub> (20 mL) was added. The mixture was refluxed overnight, and then methanol was removed by evaporation. When the reaction mixture was cooled to RT, solid resulted, which was extracted with CH<sub>2</sub>Cl<sub>2</sub> (150 mL x 3). The collected organic phase was washed with saturated NaHCO<sub>3</sub> solution and dried over MgSO<sub>4</sub>. The solvent was evaporated under reduced pressure to yield a crystalline pale yellow solid, which was dried under vacuum at RT and used without further purification. Yield: 11.70 g (94 %). <sup>1</sup>H NMR (300 MHz, CDCl<sub>3</sub>, 25 °C): δ=8.47 (s, 1H; Ar-H), 8.08 (d, J = 8.29, 1H; Ar-H), 7.86 (d, J = 8.29 Hz, 1H; Ar-H), 3.99 ppm (s, 3H; -Me).

(c) *methyl 4-(3-methoxy-3-oxoprop-1-enyl)-3-nitrobenzoate*: methyl 4-bromo-3-nitrobenzoate (5.30 g, 20 mmol), palladium acetate (0.052 g, 0.23 mmol), and triphenylphosphine (0.120 g, 0.46 mmol) were added to a Schlenk flask and outgassed for 2 h. To this, were added anhydrous N,N-dimethylformamide (8 mL), anhydrous triethylamine (4.0 mL, 30 mmol), and methyl acrylate (10 mL, 110 mmol) under N<sub>2</sub>. The clear solution was heated at 110 °C and stirred for 20 h. The black-colored solution was cooled to RT, added to ice water, and acidified with concentrated HCl until the solution became strongly acidic. The brown precipitate formed was extracted with CH<sub>2</sub>Cl<sub>2</sub> (200 mL x 5). The combined organic layer was washed with water, dried over MgSO<sub>4</sub>, and evaporated under reduced pressure to yield brown solid. The resulting product was purified by silica gel column chromatography by eluting CH<sub>2</sub>Cl<sub>2</sub>, which gave rise to a pale yellow solid. Yield: 2.70 g (51 %). <sup>1</sup>H

NMR (300 MHz, CDCl<sub>3</sub>, 25 °C):  $\delta$ =8.68 (s, 1H; Ar-H), 8.29 (m, 1H; Ar-H), 8.13 (d, J = 15.82 Hz, 1H; =C-H), 7.74 (d, J = 8.10, 1H; Ar-H), 6.45 (d, J = 15.82 Hz, 1H; =C-H), 4.00 (s, 3H; -Me), 3.86 ppm (s, 3H; -Me).

(d) *methyl 3-amino-4-(3-methoxy-3-oxoprop-1-enyl)benzoate*: methyl 4-(3-methoxy-3-oxoprop-1-enyl)-3-nitrobenzoate (2.65 g, 10 mmol) and SnCl<sub>2</sub>·2H<sub>2</sub>O (11.28 g, 50 mmol) were dissolved in ethyl acetate (200 mL). The solution was refluxed for 2 h, cooled to RT, and then saturated NaHCO<sub>3</sub> solution was added to make the solution basic. The sticky precipitate formed was filtered through a CELITE pad and washed with ethyl acetate. The filtrate was put into a separating funnel and the organic layer was separated, the aqueous layer was washed with ethyl acetate (100 mL x 2). The combined organic layer was dried over MgSO<sub>4</sub> and evaporated under reduced pressure. The product was purified by silica gel column chromatography by eluting a 1:1 mixture of ethyl acetate and hexane to yield a pale yellow crystalline solid. Yield: 2.10 g (89 %). <sup>1</sup>H NMR (300 MHz, CDCl<sub>3</sub>, 25 °C):  $\delta$ =7.81 (d, J = 16.00 Hz, 1H; =C-H), 7.41 (m, 3H; Ar-H), 6.44 (d, J = 15.80 Hz, 1H; =C-H), 4.10 (br. s, 2H; -NH<sub>2</sub>), 3.91 (s, 3H; -Me), 3.83 ppm (s, 3H; -Me).

(e) *3-amino-4-(2-carboxyvinyl)benzoic acid (H<sub>2</sub>CVB-NH<sub>2</sub>)*: methyl 3-amino-4-(3-methoxy-3-oxoprop-1-enyl)benzoate (2.10 g, 8.92 mmol) and NaOH (5.00 g, 125 mmol) were suspended in methanol (200 mL), stirred and refluxed overnight. The methanol was evaporated and the solid was dissolved in water (~100 mL) and carefully acidified with 3 N HCl until pH became 4 - 5. The precipitate formed was filtered, washed with water and dried under vacuum to yield yellow solid. Yield: 1.55 g, (84%). <sup>1</sup>H NMR (300 MHz, [D<sub>6</sub>]DMSO, 25 °C):  $\delta$ =7.81 (d, J = 15.8, 1H; =C-H), 7.52 (d, J = 8.30, 1H; Ar-H), 7.33 (s, 1H; Ar-H), 7.07 (d, J = 8.20 Hz, 1H; Ar-H), 6.38 (d, J = 15.6, 1H; =C-H), 5.79 ppm (br. s, 2H; -NH<sub>2</sub>). Elemental analysis calcd (%) for C<sub>10</sub>H<sub>9</sub>NO<sub>4</sub>: C 57.97, H 4.38, N 6.76; found: C 57.48, H 4.45, N 7.01. FTIR (KBr pellet):  $\tilde{\nu}$  = 2824 (amino), 1683 (carboxylate), 1617 cm<sup>-1</sup> (alkene).

### Synthesis of 4-(2-carboxyvinyl)-3-(methylthio)benzoic acid (H<sub>2</sub>CVB-SMe)

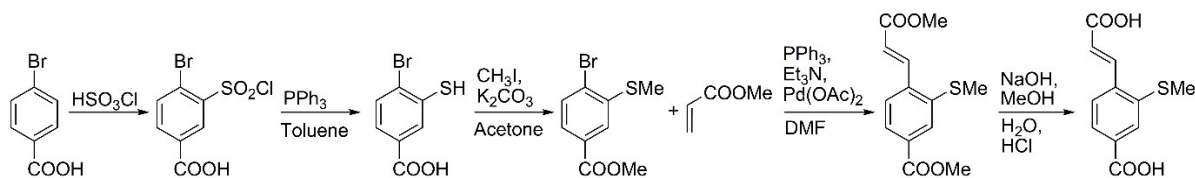

**Scheme S2.** Preparation of 4-(2-carboxyvinyl)-3-(methylthio)benzoic acid.

(a) *4-bromo-3-(chlorosulfonyl)benzoic acid*: 4-bromobenzoic acid (10.0 g, 49.7 mmol) was added in small portions to chlorosulfonic acid (25 mL) at 0 °C, and the clear solution was heated overnight at 130 - 140 °C. The solution was cooled to RT and added dropwise to an ice/water mixture (500 mL). The precipitate formed was filtered, washed with water, and dried in air. The solid was then

dissolved in diethyl ether (150 mL) and dried over Na<sub>2</sub>SO<sub>4</sub> and evaporated until the dull white powder was formed, which was used without further purification. Yield = 10.9 g, 73 %. <sup>1</sup>H NMR (300 MHz, [D<sub>6</sub>]DMSO, 25 °C): δ=8.46 (d, J = 1.9 Hz, 1H; Ar-H), 7.73 ppm (m, 2H; Ar-H).

(b) *4-bromo-3-mercaptopbenzoic acid*: 4-bromo-3-(chlorosulfonyl)benzoic acid (12.0 g, 40.0 mmol) was suspended in anhydrous toluene (200 mL), and purged with N<sub>2</sub> gas. To this suspension, PPh<sub>3</sub> (31.5 g, 120.0 mmol) was added by small portions. On complete addition, the starting material was dissolved. The solution was stirred for about 20 min at RT under N<sub>2</sub> purging. To this, aqueous NaOH (200 mL, 15 %) was added, and then the aqueous layer was separated, washed with toluene, and acidified with conc. HCl. The precipitate formed was extracted with EtOAc (300 mL), dried over MgSO<sub>4</sub>, and evaporated under reduced pressure to yield white colored solid, which was used without further purification. Yield: 5.9 g, 63 %. <sup>1</sup>H NMR (300 MHz, [D<sub>6</sub>]DMSO, 25 °C): δ=8.14 (br., 1H; Ar-H), 7.62 ppm (br., 2H; Ar-H).

(c) *methyl 4-bromo-3-(methylthio)benzoate*: 4-bromo-3-mercaptopbenzoic acid (5.9 g, 25.3 mmol) was dissolved in dry acetone (200 mL) and K<sub>2</sub>CO<sub>3</sub> (6.0 g, 43.4 mmol), and CH<sub>3</sub>I (20 mL, excess) was added and refluxed overnight. The mixture was evaporated under reduced pressure and extracted with CH<sub>2</sub>Cl<sub>2</sub> and washed with H<sub>2</sub>O. The CH<sub>2</sub>Cl<sub>2</sub> layer was dried over MgSO<sub>4</sub> and evaporated under reduced pressure to yield pale yellow liquid, which was used without further purification. Yield: 6.3 g, 95 %. <sup>1</sup>H NMR (300 MHz, CDCl<sub>3</sub>, 25 °C): δ=7.78 (s, 1H; Ar-H), 7.63 (m, 2H; Ar-H), 3.96 (s, 3H; OMe), 2.55 ppm (s, 3H; SMe).

(d) *Methyl 4-(3-methoxy-3-oxoprop-1-enyl)-3-(methylthio)benzoate*: palladium acetate (0.052 g, 0.23 mmol), and triphenylphosphine (0.120 g, 0.46 mmol) were put in a Schlenk tube and outgassed for 2 h. To this, were added a solution of methyl 4-bromo-3-(methylthio)benzoate (2.61 g, 10 mmol) in anhydrous N,N-dimethylformamide (5 mL), anhydrous triethylamine (2.0 mL, 15 mmol), and methyl acrylate (5 mL, 55 mmol) under N<sub>2</sub>. The mixture was stirred at 110 °C for 48 h. The solution was cooled to RT, added to ice water, and acidified with concentrated HCl. The precipitate formed was extracted with CH<sub>2</sub>Cl<sub>2</sub> (100 mL x 3). The combined organic layer was washed with water, dried over MgSO<sub>4</sub>, and evaporated under reduced pressure to yield brown material, which was purified by silica gel column chromatography by eluting CH<sub>2</sub>Cl<sub>2</sub> to result in a yellow solid. Yield: 1.65 g (62 %). <sup>1</sup>H NMR (300 MHz, CDCl<sub>3</sub>, 25 °C): δ=8.13 (d, J = 16.0 Hz, 1H; =C-H), 7.96 (s, 1H; Ar-H), 7.82 (d, J = 7.9 Hz, 1H; Ar-H), 7.57 (d, J = 8.10, 1H; Ar-H), 6.45 (d, J = 15.8 Hz, 1H; =C-H), 3.95 (s, 3H; -OMe), 3.84 (s, 3H; -OMe), 2.55 ppm (s, 3H; -SMe).

(e) *4-(2-carboxyvinyl)-3-(methylthio)benzoic acid (H<sub>2</sub>CVB-SMe)*: methyl 4-(3-methoxy-3-oxoprop-1-enyl)-3-(methylthio)benzoate (1.60 g, 6.00 mmol) and NaOH (1.0 g, 25 mmol) were dissolved in methanol (150 mL) and refluxed overnight. The methanol was removed by evaporation. The solid formed was dissolved in water (~100 mL) and acidified with HCl to yield yellow

precipitate, which was filtered, washed with water, and dried under vacuum. Yield: 1.40 g, (98%). <sup>1</sup>H NMR (300 MHz, [D<sub>6</sub>]DMSO, 25 °C): δ=12.93 (br. s, 2H; -COOH), 7.93 (d, J = 15.8, 1H; =C-H), 7.85 (br. m, 2H; Ar-H), 7.74 (br. s, 1H; Ar-H), 6.60 (d, J = 15.6, 1H; =C-H), 2.58 ppm (br. s, 3H; SMe). Elemental analysis calcd (%) for C<sub>11</sub>H<sub>10</sub>O<sub>4</sub>S: C 55.45, H 4.23; found: C 53.45, H 4.49. FTIR (KBr pellet):  $\tilde{\nu}$  = 1689 (carboxylate), 1629 cm<sup>-1</sup> (alkene).

### Synthesis of 3-alkoxy-4-(2-carboxyvinyl)benzoic acid (H<sub>2</sub>CVB-OR)

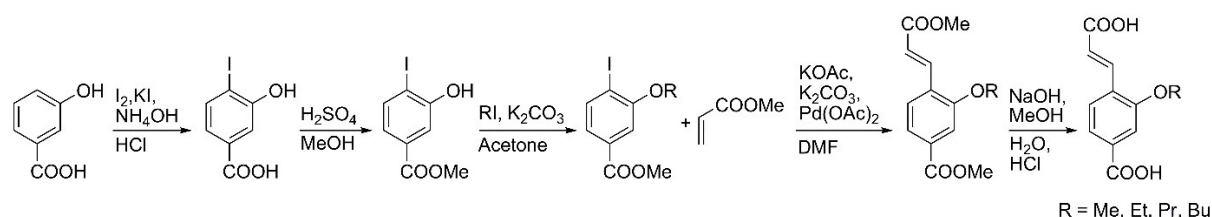

### Scheme S3. Preparation of 3-alkoxy-4-(2-carboxyvinyl)benzoic acids.

(a) *3-hydroxy-4-iodobenzoic acid*: The compound was synthesized by the reported method.<sup>S1</sup> The product was used in the next step without further purification. <sup>1</sup>H NMR (300 MHz, [D<sub>6</sub>]DMSO, 25 °C): δ=10.68 (br. s, 1H; =O-H), 7.81 (m, 1H; Ar-H), 7.44 (m, 1H; Ar-H), 7.14 ppm (m, 1H; Ar-H).

(b) *methyl 3-hydroxy-4-iodobenzoate*: The mixture of 3-hydroxy-4-iodobenzoic acid (10.6 g, 40.0 mmol), conc.H<sub>2</sub>SO<sub>4</sub> (30 mL), and methanol (300 mL) were refluxed overnight with stirring. The clear solution was evaporated under reduced pressure, extracted with CH<sub>2</sub>Cl<sub>2</sub>, washed with water, dried over MgSO<sub>4</sub>. The solvent was removed by evaporation under reduced pressure to yield dull-white crystalline precipitate, which was used in the next step without further purification. Yield: 9.70 g (87 %). <sup>1</sup>H NMR (300 MHz, CDCl<sub>3</sub>, 25 °C): δ=7.78 (m, 1H; Ar-H), 7.66 (m, 1H; Ar-H), 7.35 (m, 1H; Ar-H), 3.94 ppm (s, 3H; -CH<sub>3</sub>).

(c) *methyl 4-iodo-3-methoxybenzoate*: methyl 3-hydroxy-4-iodobenzoate (5.56 g, 20 mmol), K<sub>2</sub>CO<sub>3</sub> (2.40 g, 60 mmol) and iodomethane (4.0 mL, 64 mmol) were mixed with dry acetone (50 mL), and then refluxed overnight. The solvent was evaporated to dryness under reduced pressure, and then water (100 mL) was added and extracted with CH<sub>2</sub>Cl<sub>2</sub> (100 mL x 3). The combined CH<sub>2</sub>Cl<sub>2</sub> layer was washed with water, dried over MgSO<sub>4</sub>, and then evaporated under reduced pressure, which gave rise to pale yellow liquid, which was used in the next step without further purification. Yield = 5.70 g (97 %). <sup>1</sup>H NMR (300 MHz, CDCl<sub>3</sub>, 25 °C): δ=7.87 (d, J = 8.1 Hz, 1H; Ar-H), 7.46 (s, 1H; Ar-H), 7.38 (d, J = 7.0 Hz, 1H; Ar-H), 3.96 (s, 3H; Me), 3.94 ppm (s, 3H; Me).

(d) *methyl 3-ethoxy-4-iodobenzoate*: The compound was synthesized by a similar method to that used for the synthesis of *methyl 4-iodo-3-methoxybenzoate*, using iodoethane (5.0 mL, 62.5 mmol). Yield = 5.80 g (95 %). <sup>1</sup>H NMR (300 MHz, CDCl<sub>3</sub>, 25 °C): δ=7.86 (m, 1H; Ar-H), 7.43 (m, 1H; Ar-

H), 7.36 (m, 1H; Ar-H), 4.17 (q, J = 7 Hz, 2H; CH<sub>2</sub>), 3.92 (s, 3H; CH<sub>3</sub>), 1.53 ppm (t, J = 7 Hz, 3H; CH<sub>3</sub>).

(e) *methyl 4-iodo-3-propoxybenzoate*: The compound was synthesized by a similar method to that used for *methyl 4-iodo-3-methoxybenzoate*, using iodopropane (6.0 mL, 61.8 mmol). Yield = 6.15 g (96 %). <sup>1</sup>H NMR (300 MHz, CDCl<sub>3</sub>, 25 °C): δ=7.86 (d, J = 8.1 Hz, 1H; Ar-H), 7.43 (d, J = 1.9 Hz, 1H; Ar-H), 7.36 (dd, J = 8.1, 1.9 Hz, 1H; Ar-H), 4.17 (t, J = 6.4 Hz, 2H; CH<sub>2</sub>), 3.93 (s, 3H; CH<sub>3</sub>), 1.90 (m, 2H; CH<sub>2</sub>), 1.12 ppm (t, J = 7.3 Hz, 3H; CH<sub>3</sub>).

(f) *methyl 3-butoxy-4-iodobenzoate*: The compound was synthesized by a similar method as that used for *methyl 4-iodo-3-methoxybenzoate*, using iodobutane (7.0 mL, 61.5 mmol). Yield = 6.41 g (96 %). <sup>1</sup>H NMR (300 MHz, CDCl<sub>3</sub>, 25 °C): δ=7.86 (d, J = 8.1 Hz, 1H; Ar-H), 7.43 (d, J = 1.7 Hz, 1H; Ar-H), 7.36 (dd, J = 8.0, 1.9 Hz, 1H; Ar-H), 4.10 (t, J = 6.3 Hz, 2H; CH<sub>2</sub>), 3.93 (s, 3H; CH<sub>3</sub>), 1.85 (m, 2H; CH<sub>2</sub>), 1.59 (m, 2H; CH<sub>2</sub>), 1.02 ppm (t, J = 7.3 Hz, 3H; CH<sub>3</sub>).

(g) *methyl 3-methoxy-4-(3-methoxy-3-oxoprop-1-enyl)benzoate*: methyl 4-iodo-3-methoxybenzoate (5.70 g, 19.50 mmol), palladium acetate (0.11 g, 0.50 mmol), potassium acetate (1.96 g, 19.97 mmol) and K<sub>2</sub>CO<sub>3</sub> (3.50 g, 25.36 mmol) were added to a Schlenk flask and outgassed for 2 h. To this, were added anhydrous N,N-dimethylformamide (10 mL), and methyl acrylate (6 mL, 66.21 mmol) under N<sub>2</sub>. The mixture was stirred at 90 °C for 48 h. The solution was cooled to RT, added to ice water, and acidified with concentrated HCl. The brown precipitate formed was extracted with CH<sub>2</sub>Cl<sub>2</sub> (150 mL x 3). The combined CH<sub>2</sub>Cl<sub>2</sub> layer was washed with water, dried over MgSO<sub>4</sub>. The solvent was removed by evaporation under reduced pressure until brown material resulted. The product was purified by silica gel column chromatography by eluting CH<sub>2</sub>Cl<sub>2</sub>, which gave rise to white solid. Yield: 3.70 g (76 %). <sup>1</sup>H NMR (300 MHz, CDCl<sub>3</sub>, 25 °C): δ=8.00 (d, J = 16.2 Hz, 1H; =C-H), 7.62 (m, 3H; Ar-H), 6.61 (d, J = 16.2 Hz, 1H; =C-H), 3.97 (s, 3H; CH<sub>3</sub>), 3.95 (s, 3H; CH<sub>3</sub>), 3.83 ppm (s, 3H; -CH<sub>3</sub>).

(h) *4-(2-carboxyvinyl)-3-methoxybenzoic acid (H<sub>2</sub>CVB-OMe)*: methyl 3-methoxy-4-(3-methoxy-3-oxoprop-1-enyl)benzoate (3.7 g, 14.8 mmol) and NaOH (2.4 g, 60.0 mmol) were added in methanol (200 mL), and the mixture refluxed overnight. Methanol was evaporated under reduced pressure, the precipitate formed was dissolved in water and acidified with conc. HCl. The precipitate formed was filtered by suction, washed with water, and dried under vacuum at 100 °C to yield a white powder. Yield = 2.80 g (85 %). <sup>1</sup>H NMR (300 MHz, [D<sub>6</sub>]DMSO, 25 °C): δ=7.82 (m, 2H; =C-H, Ar-H), 7.56 (m, 2H; Ar-H), 6.62 (d, J = 16.2, 1H; =C-H), 3.93 ppm (s, 3H; -CH<sub>3</sub>). Elemental analysis calcd (%) for C<sub>11</sub>H<sub>10</sub>O<sub>5</sub>: C 59.46, H 4.54; found: C 58.42, H 4.35. FTIR (KBr pellet):  $\tilde{\nu}$  = 1690 (carboxylate), 1628 cm<sup>-1</sup> (alkene).

(i) *methyl 3-ethoxy-4-(3-methoxy-3-oxoprop-1-enyl)benzoate*: The compound was synthesized by a similar method to that used for *methyl 3-methoxy-4-(3-methoxy-3-oxoprop-1-enyl)benzoate*, using methyl 3-ethoxy-4-iodobenzoate (5.75 g, 18.78 mmol). Yield: 4.20 g (85 %). <sup>1</sup>H NMR (300 MHz, CDCl<sub>3</sub>, 25 °C): δ=8.00 (d, J = 16.2 Hz, 1H; =C-H), 7.60 (m, 3H; Ar-H), 6.63 (d, J = 16.2 Hz, 1H; =C-H), 4.19 (q, J = 7.0 Hz, 2H; CH<sub>2</sub>), 3.95 (s, 3H; CH<sub>3</sub>), 3.83 (s, 3H; -CH<sub>3</sub>), 1.51 ppm (t, J = 7.0 Hz, 3H; -CH<sub>3</sub>).

(j) *4-(2-carboxyvinyl)-3-ethoxybenzoic acid (H<sub>2</sub>CVB-OEt)*: The compound was synthesised by a similar method to that used for *4-(2-carboxyvinyl)-3-methoxybenzoic acid*, using methyl 3-ethoxy-4-(3-methoxy-3-oxoprop-1-enyl)benzoate (4.20 g, 15.90 mmol). Yield = 3.52 g (94 %). <sup>1</sup>H NMR (300 MHz, [D<sub>6</sub>]DMSO, 25 °C): δ=7.82 (m, 2H; =C-H, Ar-H), 7.53 (m, 2H; Ar-H), 6.64 (d, J = 16.2, 1H; =C-H), 4.18 (q, J = 6.8 Hz, 2H; CH<sub>2</sub>), 1.41 ppm (t, J = 6.9 Hz, 3H; -CH<sub>3</sub>). Elemental analysis calcd (%) for C<sub>12</sub>H<sub>12</sub>O<sub>5</sub>: C 61.01, H 5.12; found: C 59.93, H 5.79. FTIR (KBr pellet):  $\tilde{\nu}$  = 1690 (carboxylate), 1627 cm<sup>-1</sup> (alkene).

(k) *methyl 4-(3-methoxy-3-oxoprop-1-enyl)-3-propoxybenzoate*: The compound was synthesised by a similar method to that used for *methyl 3-methoxy-4-(3-methoxy-3-oxoprop-1-enyl)benzoate*, using methyl 4-iodo-3-propoxybenzoate (6.10 g, 19.05 mmol). Yield: 4.70 g (89 %). <sup>1</sup>H NMR (300 MHz, CDCl<sub>3</sub>, 25 °C): δ=8.00 (d, J = 16.2 Hz, 1H; =C-H), 7.59 (m, 3H; Ar-H), 6.64 (d, J = 16.2 Hz, 1H; =C-H), 4.07 (t, J = 6.5 Hz, 2H; CH<sub>2</sub>), 3.94 (s, 3H; CH<sub>3</sub>), 3.82 (s, 3H; CH<sub>3</sub>), 1.93 (m, 2H; CH<sub>2</sub>), 1.10 ppm (t, J = 7.4 Hz, 3H; -CH<sub>3</sub>).

(l) *4-(2-carboxyvinyl)-3-propoxybenzoic acid (H<sub>2</sub>CVB-OPr)*: The compound was synthesised by a similar method to that used for *4-(2-carboxyvinyl)-3-methoxybenzoic acid*, using methyl 4-(3-methoxy-3-oxoprop-1-enyl)-3-propoxybenzoate (4.70 g, 16.88 mmol). Yield = 3.90 g (92 %). <sup>1</sup>H NMR (300 MHz, [D<sub>6</sub>]DMSO, 25 °C): δ=7.82 (m, 2H; =C-H, Ar-H), 7.53 (m, 2H; Ar-H), 7.56 (m, 2H; Ar-H), 6.65 (d, J = 16.2, 1H; =C-H), 4.08 (t, J = 6.3 Hz, 2H; CH<sub>2</sub>), 1.80 (m, 2H; CH<sub>2</sub>), 1.02 ppm (m, 3H; -CH<sub>3</sub>). Elemental analysis calcd (%) for C<sub>13</sub>H<sub>14</sub>O<sub>5</sub>: C 62.39, H 5.64; found: C 61.68, H 6.12. FTIR (KBr pellet):  $\tilde{\nu}$  = 1690 (carboxylate), 1627 cm<sup>-1</sup> (alkene).

(m) *methyl 3-butoxy-4-(3-methoxy-3-oxoprop-1-enyl)benzoate*: The compound was synthesised by a similar method to that used for *methyl 3-methoxy-4-(3-methoxy-3-oxoprop-1-enyl)benzoate*, using methyl 3-butoxy-4-iodobenzoate (6.40 g, 19.15 mmol). Yield: 4.00 g (68 %). <sup>1</sup>H NMR (300 MHz, CDCl<sub>3</sub>, 25 °C): δ=8.00 (d, J = 16.2 Hz, 1H; =C-H), 7.59 (m, 3H; Ar-H), 6.64 (d, J = 16.2 Hz, 1H; =C-H), 4.12 (m, 2H; CH<sub>2</sub>), 3.95 (s, 3H; CH<sub>3</sub>), 3.83 (s, 3H; CH<sub>3</sub>), 1.88 (m, 2H; CH<sub>2</sub>), 1.55 (m, 2H; CH<sub>2</sub>), 1.03 ppm (m, 3H; -CH<sub>3</sub>).

(n) *3-butoxy-4-(2-carboxyvinyl)benzoic acid (H<sub>2</sub>CVB-OBu)*: The compound was synthesised by a similar method to that used for *4-(2-carboxyvinyl)-3-methoxybenzoic acid*, using methyl 3-butoxy-4-

(3-methoxy-3-oxoprop-1-enyl)benzoate (4.00 g, 13.68 mmol). Yield = 3.50 g (96 %). <sup>1</sup>H NMR (300 MHz, [D<sub>6</sub>]DMSO, 25 °C): δ=7.83 (m, 2H; =C-H, Ar-H), 7.53 (m, 2H; Ar-H), 6.65 (m, 1H; =C-H), 4.11 (m, 2H; CH<sub>2</sub>), 1.77 (m, 2H; CH<sub>2</sub>), 1.47 (m, 2H; CH<sub>2</sub>), 0.97 ppm (m, 3H; -CH<sub>3</sub>). Elemental analysis calcd (%) for C<sub>14</sub>H<sub>16</sub>O<sub>5</sub>: C 63.62, H 6.10; found: C 62.85, H 5.86. FTIR (KBr pellet):  $\tilde{\nu}$  = 1689 (carboxylate), 1627 cm<sup>-1</sup> (alkene).

## B. Synthesis of MOFs

All MOFs were synthesized by using H<sub>2</sub>CVB-XR by a similar method to the synthesis of [Zn<sub>4</sub>O(CVB-NH<sub>2</sub>)<sub>3</sub>]•18DMF•H<sub>2</sub>O (SNU-170) described in the main text.

**Synthesis of [Zn<sub>4</sub>O(CVB-SMe)<sub>3</sub>]•7DMF•3H<sub>2</sub>O (SNU-171).** The compound was synthesised by a similar method to that for SNU-170, using H<sub>2</sub>CVB-SMe (0.024 g, 0.101 mmol). Yield: 0.025 g (48 %). Anal. Calcd for C<sub>54</sub>H<sub>79</sub>N<sub>7</sub>O<sub>23</sub>S<sub>3</sub>Zn<sub>4</sub>: C, 41.79; H, 5.13; N, 6.32. Found: C, 41.80; H, 5.22; N, 6.23. FTIR (KBr pellet):  $\tilde{\nu}$  = 1671 (DMF), 1610 cm<sup>-1</sup> (carboxylate).

**Synthesis of [Zn<sub>4</sub>O(CVB-OMe)<sub>3</sub>]•7DMF•3H<sub>2</sub>O (SNU-172).** The compound was synthesized by a similar method to that for SNU-170, using H<sub>2</sub>CVB-OMe (0.023 g, 0.104 mmol). Yield: 0.030 g (60 %). Anal. Calcd for C<sub>54</sub>H<sub>79</sub>N<sub>7</sub>O<sub>26</sub>Zn<sub>4</sub>: C, 43.13; H, 5.29; N, 6.52. Found: C, 43.46; H, 5.24; N, 6.70. FTIR (KBr pellet):  $\tilde{\nu}$  = 1671 (DMF), 1610 cm<sup>-1</sup> (carboxylate).

**Synthesis of [Zn<sub>4</sub>O(CVB-OEt)<sub>3</sub>]•7DMF•2H<sub>2</sub>O (SNU-173).** The compound was synthesized by a method similar to the synthesis of SNU-170, using H<sub>2</sub>CVB-OEt (0.024 g, 0.102 mmol). Yield: 0.025 g (49 %). Anal. Calcd for C<sub>57</sub>H<sub>83</sub>N<sub>7</sub>O<sub>25</sub>Zn<sub>4</sub>: C, 44.81; H, 5.48; N, 6.42. Found: C, 45.02; H, 5.67; N, 6.10. FTIR (KBr pellet):  $\tilde{\nu}$  = 1671 (DMF), 1608 cm<sup>-1</sup> (carboxylate).

**Synthesis of [Zn<sub>4</sub>O(CVB-OPr)<sub>3</sub>]•16DMF•3H<sub>2</sub>O (SNU-174).** The compound was synthesized by a method similar to the synthesis of SNU-170, using H<sub>2</sub>CVB-OPr (0.025 g, 0.100 mmol). Yield: 0.040 g (53 %). Anal. Calcd for C<sub>87</sub>H<sub>154</sub>N<sub>16</sub>O<sub>35</sub>Zn<sub>4</sub>: C, 46.53; H, 6.91; N, 9.98. Found: C, 45.45; H, 7.44; N, 9.73. FTIR (KBr pellet):  $\tilde{\nu}$  = 1671 (DMF), 1602 cm<sup>-1</sup> (carboxylate).

**Synthesis of [Zn<sub>4</sub>O(CVB-OBu)<sub>3</sub>]•15DMF•3H<sub>2</sub>O (SNU-175).** The compound was synthesized by a method similar to the synthesis of SNU-170, using H<sub>2</sub>CVB-OBu (0.027 g, 0.102 mmol). Yield: 0.040 g (54 %). Anal. Calcd for C<sub>87</sub>H<sub>153</sub>N<sub>15</sub>O<sub>34</sub>Zn<sub>4</sub>: C, 47.18; H, 6.96; N, 9.48. Found: C, 45.80; H, 7.00; N, 9.48. FTIR (KBr pellet):  $\tilde{\nu}$  = 1671 (DMF), 1601 cm<sup>-1</sup> (carboxylate).

**Synthesis of [Zn<sub>4</sub>O(CVB-SMe)<sub>1</sub>(CVB-OMe)<sub>2</sub>]•7DMF•3H<sub>2</sub>O (SNU-176).** The compound was synthesized by a method similar to the synthesis of SNU-170, using H<sub>2</sub>CVB-SMe (0.012 g, 0.050 mmol) and H<sub>2</sub>CVB-OMe (0.011 g, 0.050 mmol). Yield: 0.030 g (40 %). Anal. Calcd for



$C_{54}H_{79}N_7O_{25}SZn_4$ : C, 42.67; H, 5.24; N, 6.45. Found: C, 42.97; H, 5.28; N, 6.87. FTIR (KBr pellet):  $\tilde{\nu}$  = 1671 (DMF), 1605  $cm^{-1}$  (carboxylate). The ratio between CVB-SMe<sup>2-</sup> and CVB-OMe<sup>2-</sup> were confirmed by the NMR analysis of the activated sample, digested in DCI/D<sub>2</sub>O (35%), and dissolved in DMSO (Fig. S10).

### C. References

S1 G. S. Cockerill, P. C. Levett, D. A. Whiting, *J. Chem. Soc., Perkin Trans. 1*, **1995**, 1103-1113.

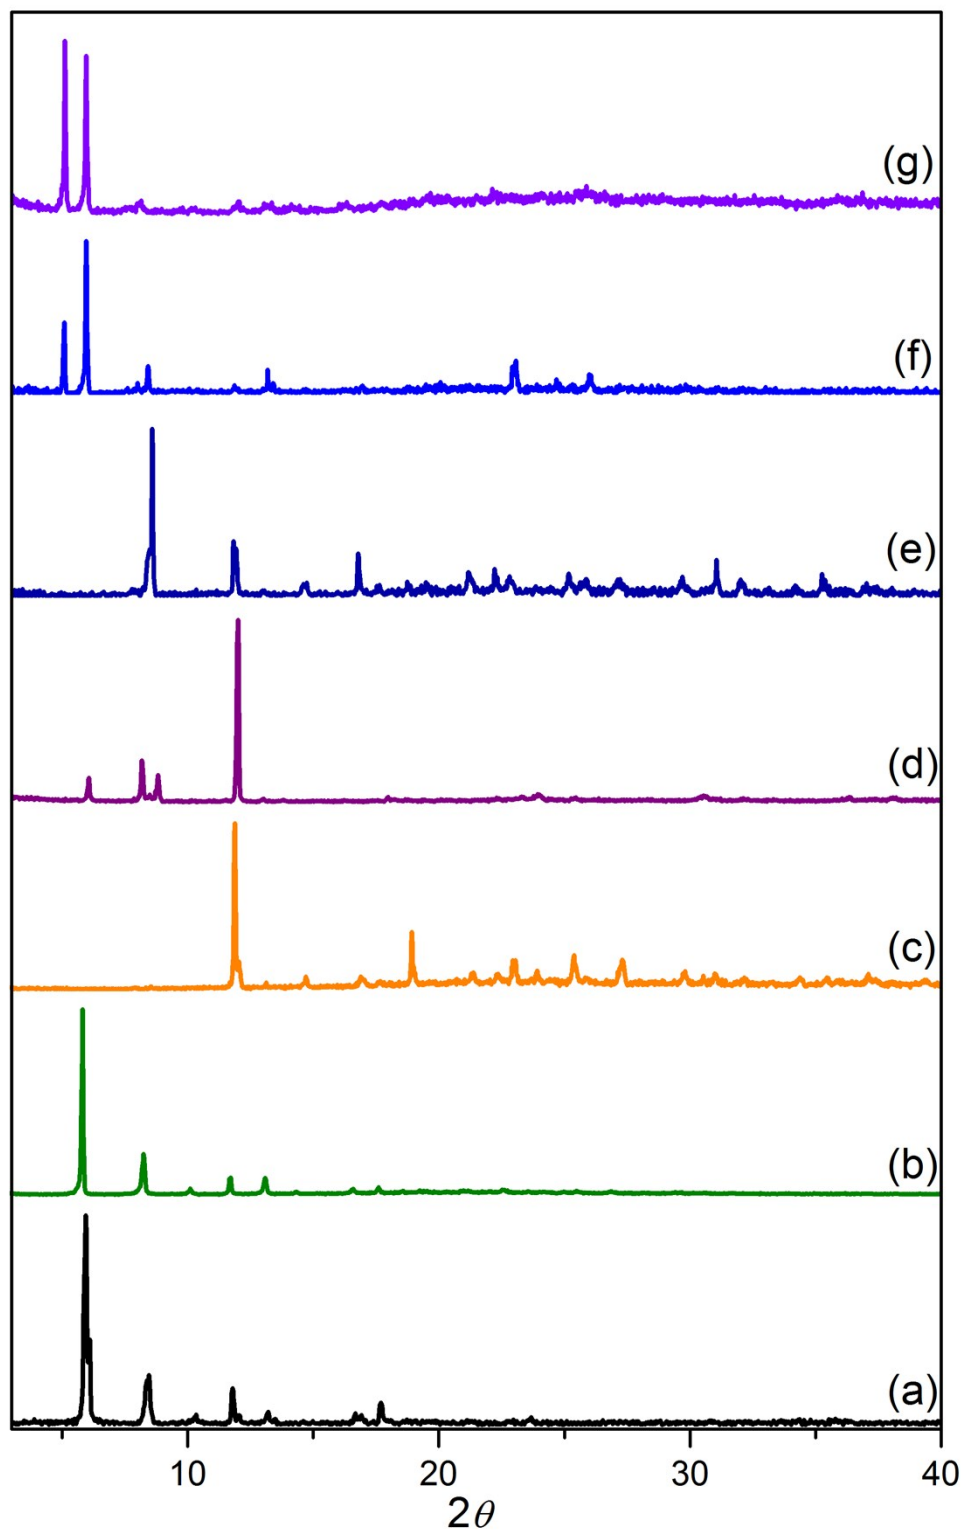

**Fig. S1** The PXRD patterns of as-synthesized samples: (a) SNU-70, (b) SNU-170, (c) SNU-171, (d) SNU-172, (e) SNU-173, (f) SNU-174, and (g) SNU-175.

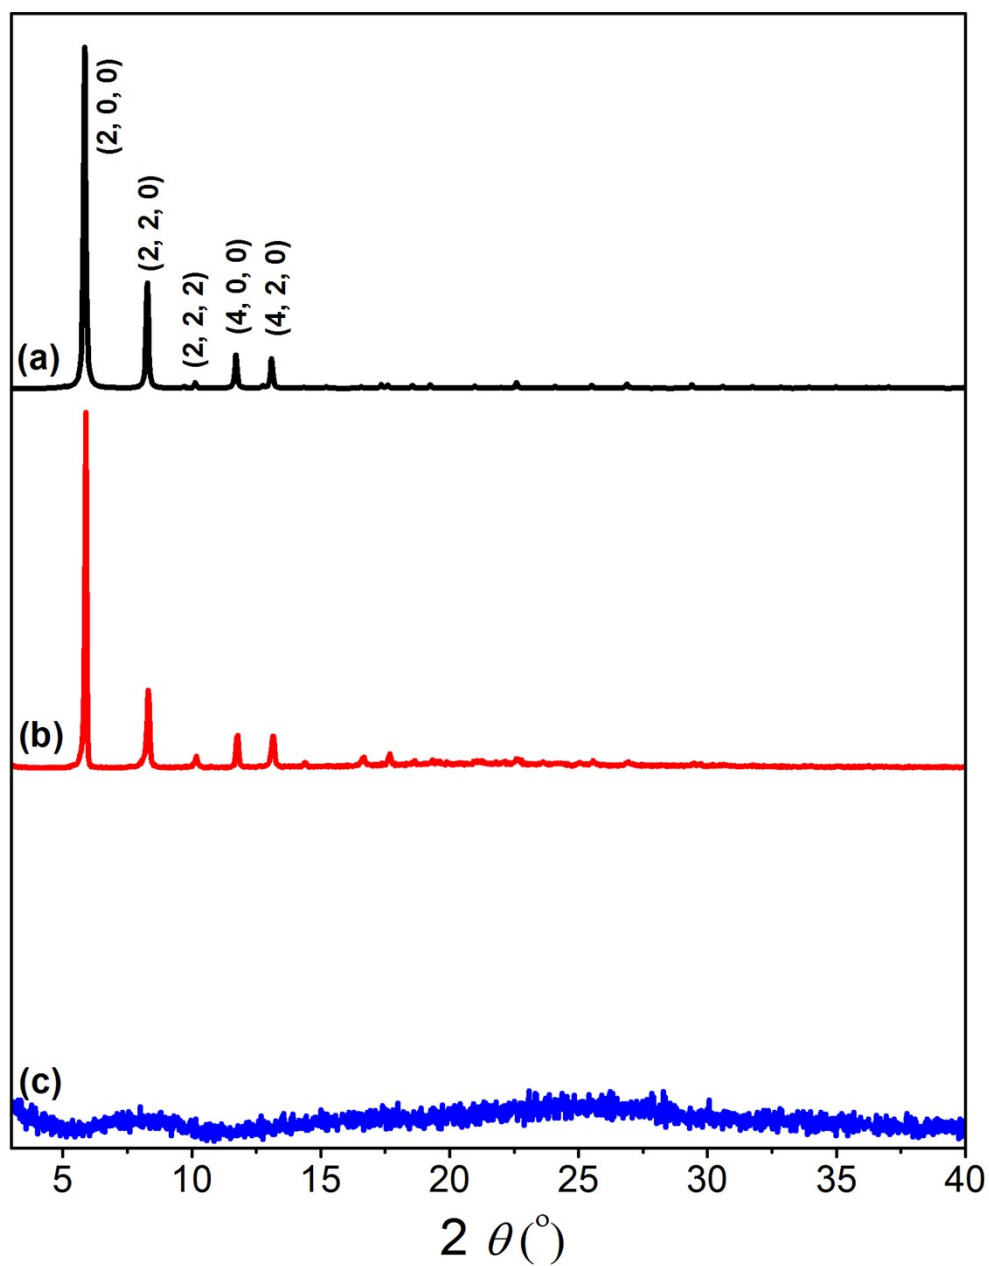

**Fig. S2** The PXRd patterns of SNU-170: (a) simulated from the X-ray crystallographic data, (b) measured for as-synthesized sample, and (c) measured after activation with supercritical  $\text{CO}_2$ .

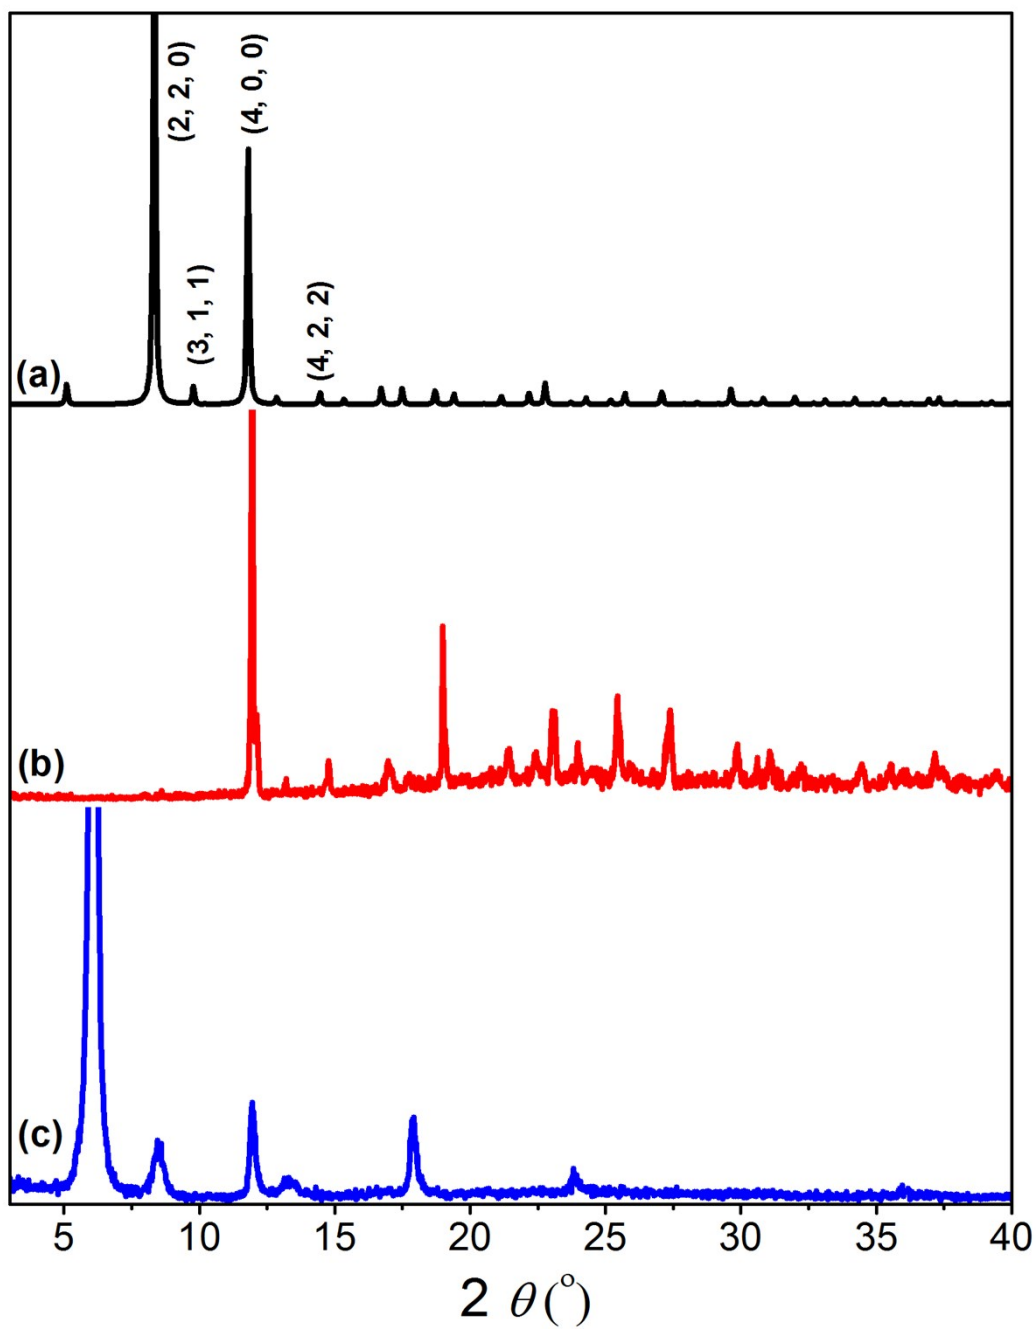

**Fig. S3** The PXR D patterns of SNU-171: (a) simulated from the X-ray crystallographic data, (b) measured for as-synthesized sample, and (c) measured after activation with supercritical  $\text{CO}_2$ .

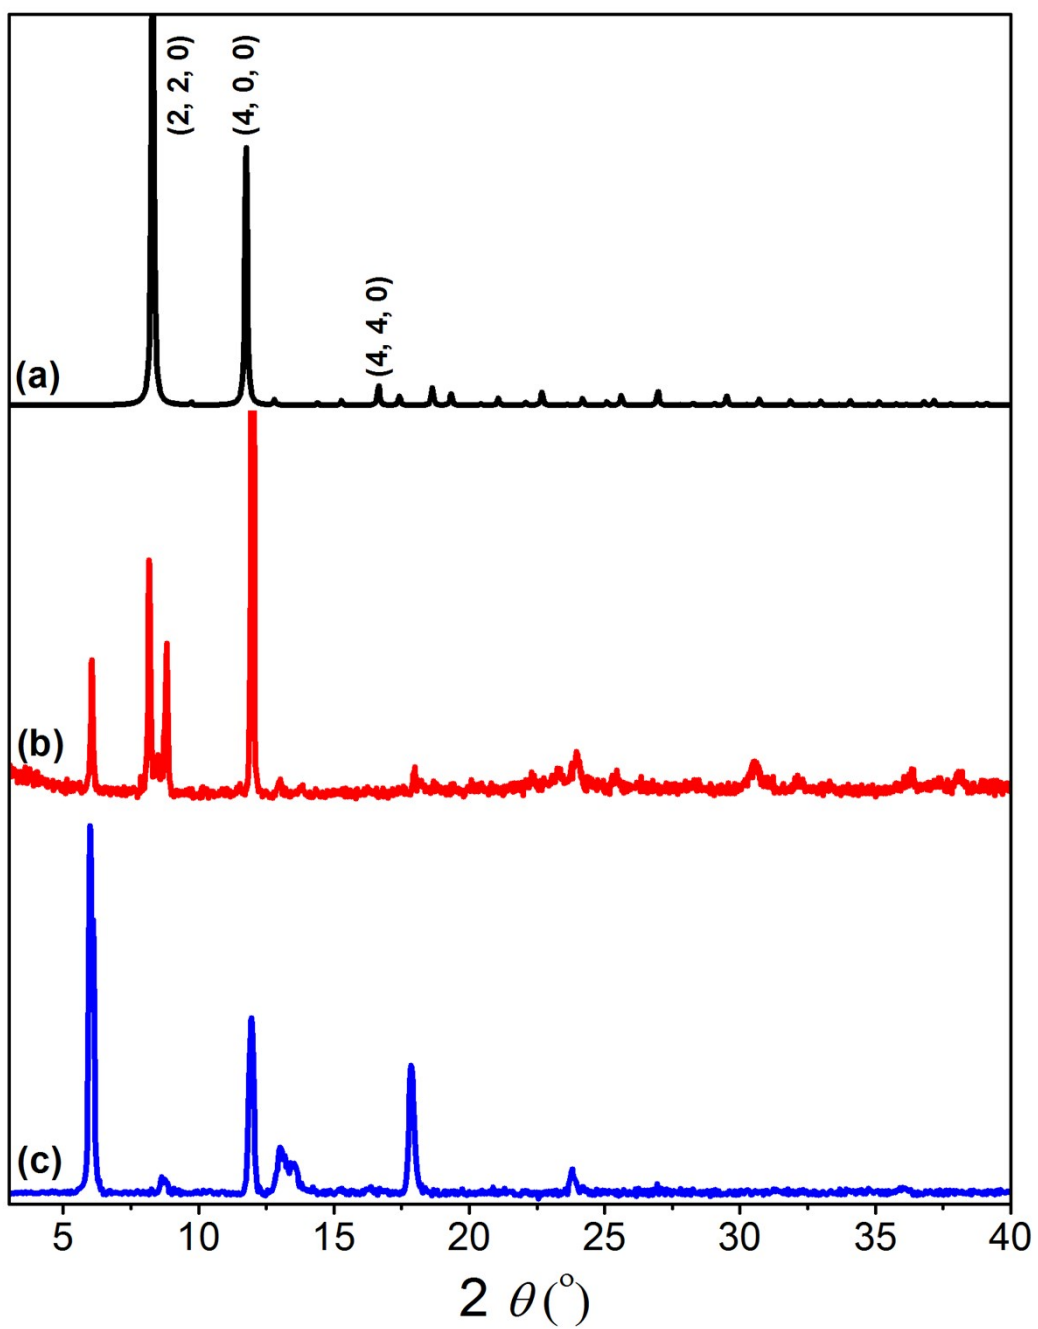

**Fig. S4** The PXRD patterns of SNU-172: (a) simulated from the X-ray crystallographic data, (b) measured for as-synthesized sample, and (c) measured after activation with supercritical  $\text{CO}_2$ .

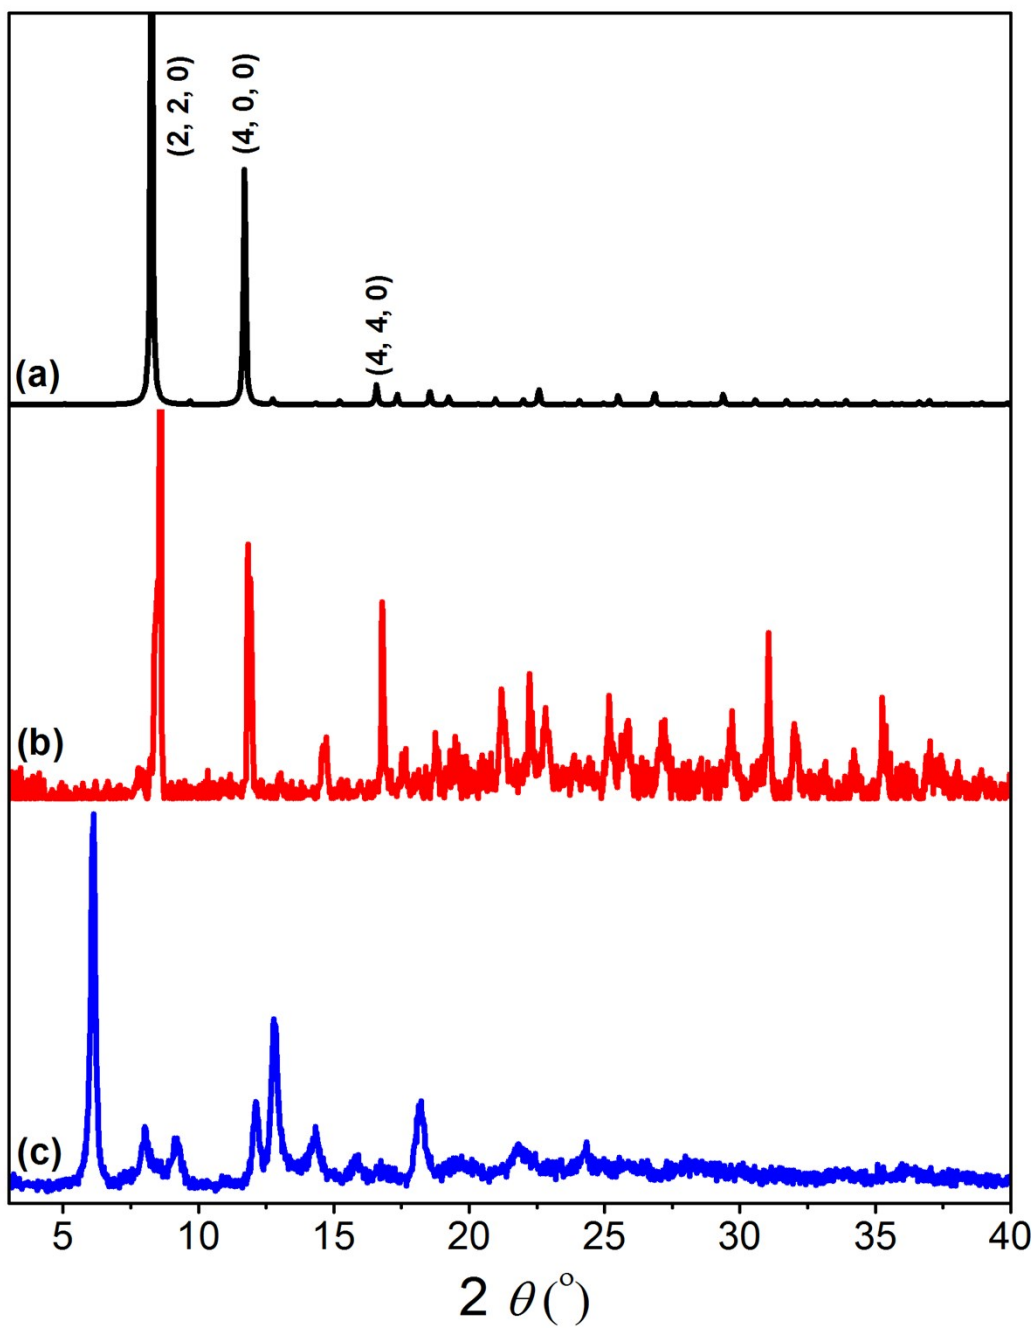

**Fig. S5** The PXRD patterns of SNU-173: (a) simulated from the X-ray crystallographic data, (b) measured for as-synthesized sample, and (c) measured after activation with supercritical CO<sub>2</sub>.

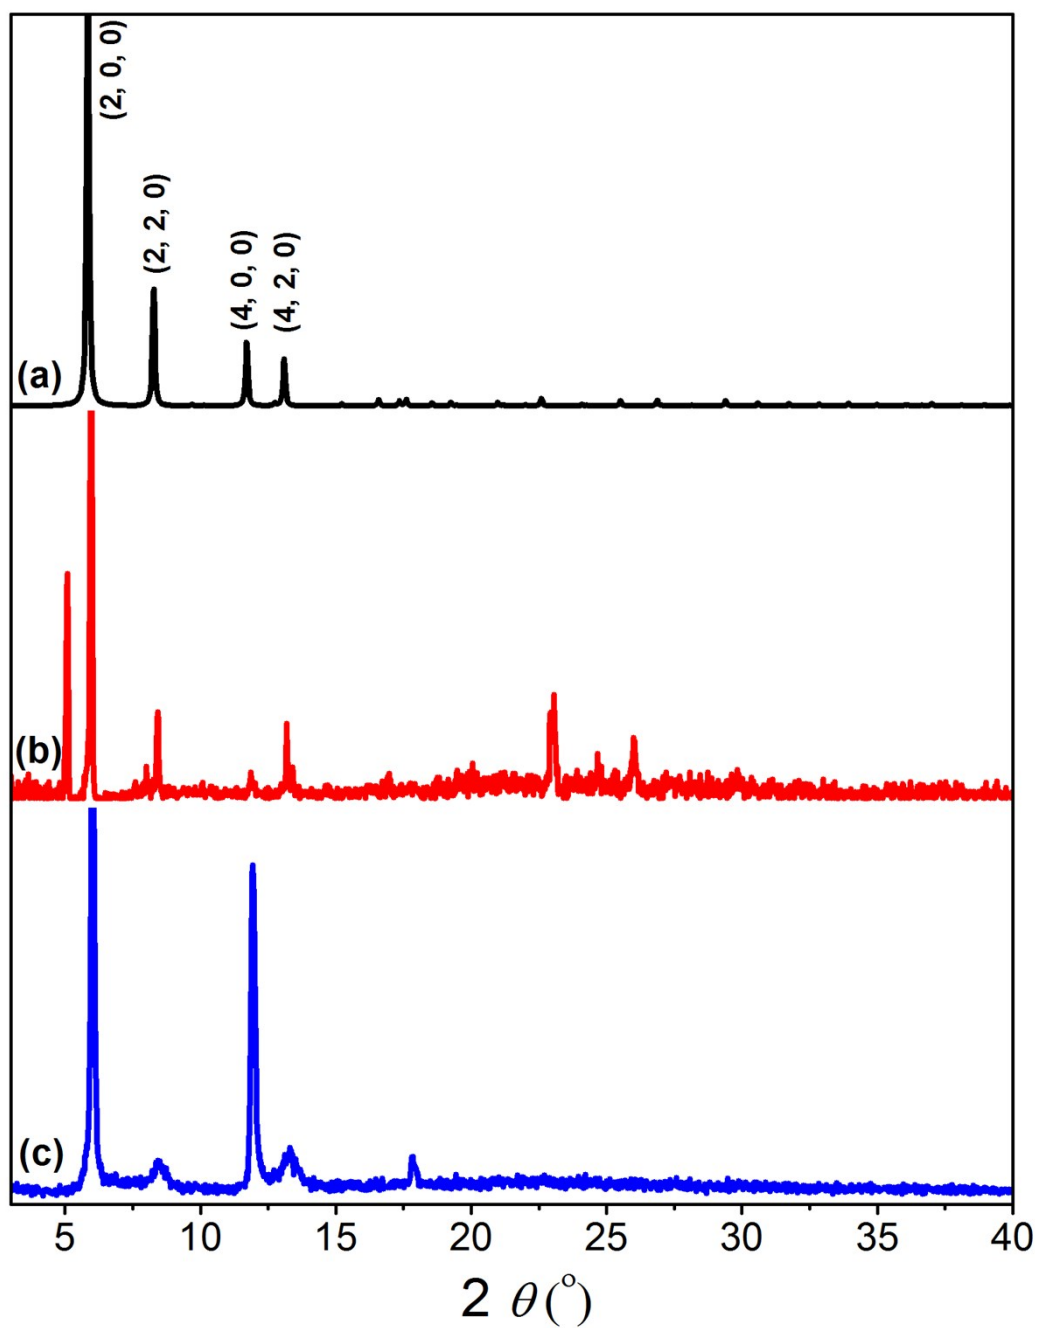

**Fig. S6** The PXRD patterns of SNU-174: (a) simulated from the X-ray crystallographic data, (b) measured for as-synthesized sample, and (c) measured after activation with supercritical  $\text{CO}_2$ .

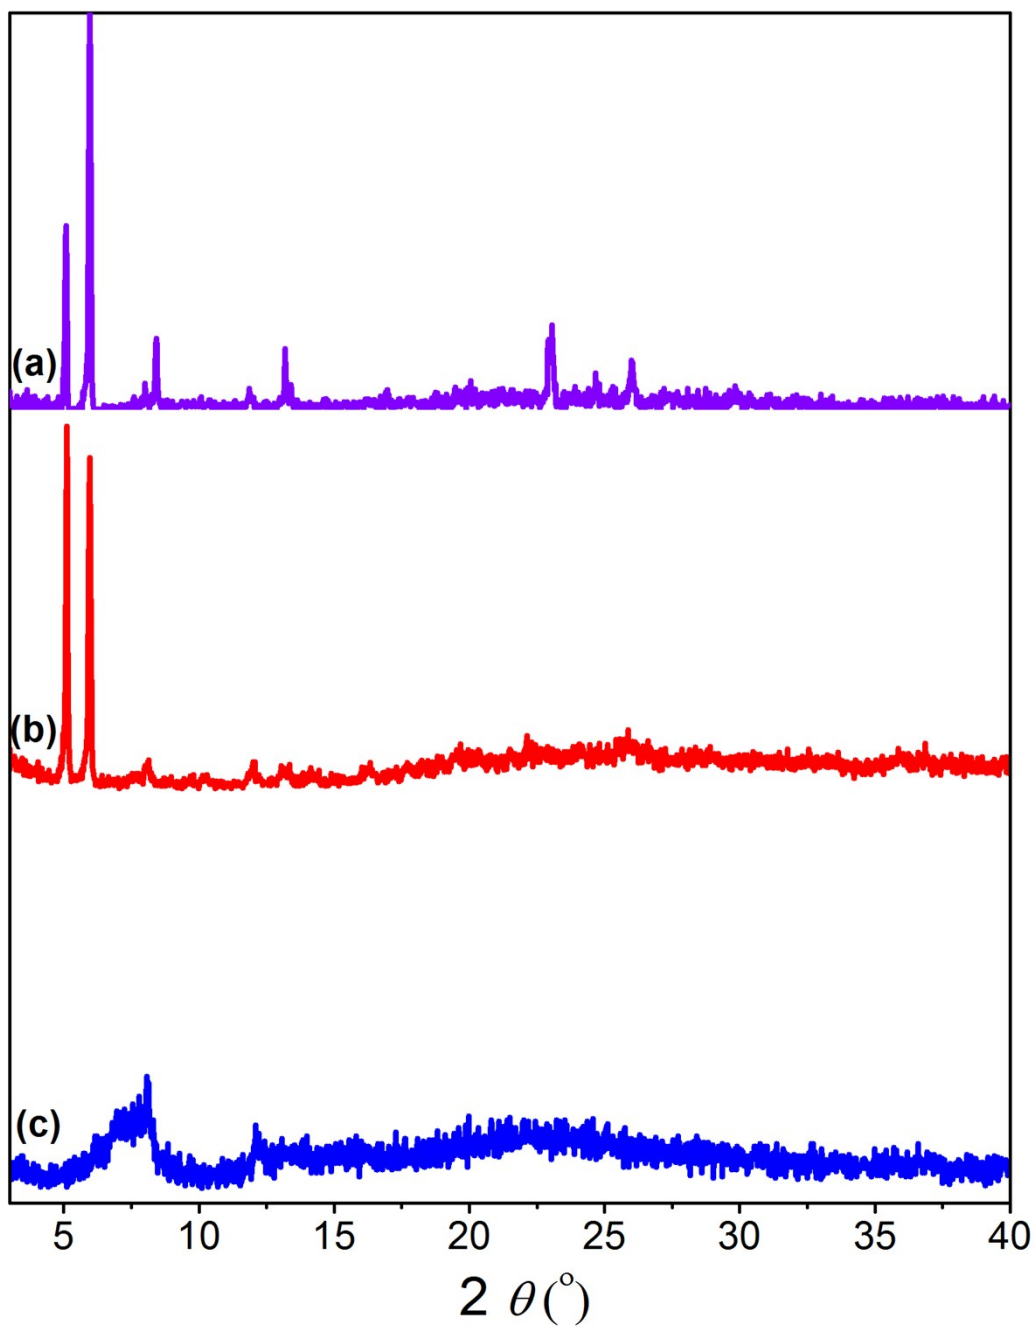

**Fig. S7** The PXRD patterns of SNU-175: (a) measured for an as-synthesized sample of SNU-174, (b) measured for an as-synthesized sample of SNU-175, and (c) measured for SNU-175 after activation with supercritical CO<sub>22</sub>.



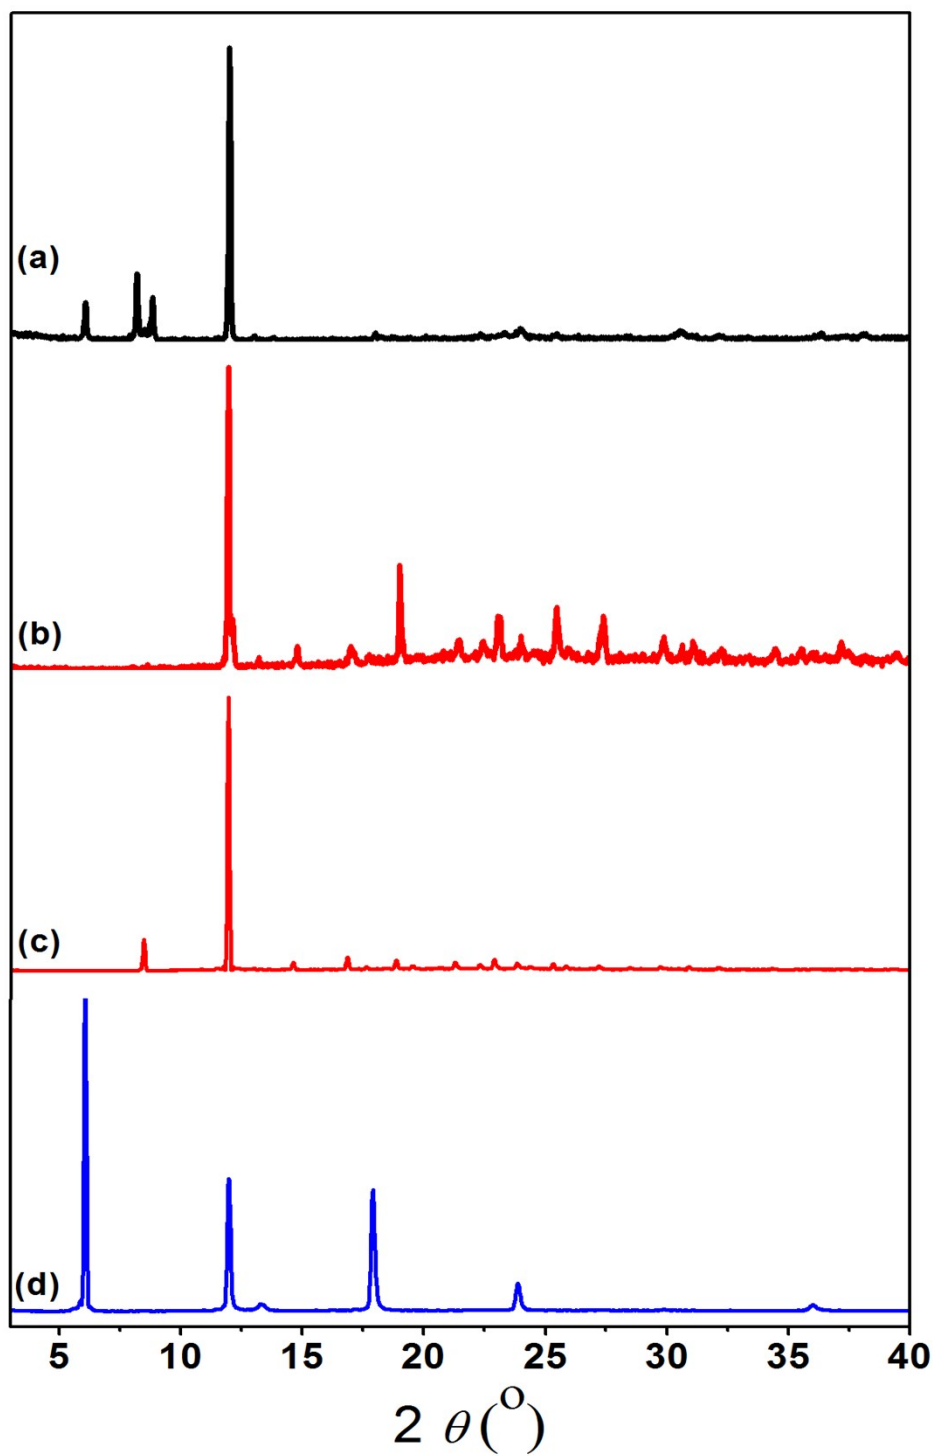

**Fig. S8** The PXRD patterns of SNU-176: (a) as-synthesized sample of SNU-172, (b) as-synthesized sample of SNU-171, (c) as-synthesized sample of SNU-176, and (d) after activation of SNU-176 by using supercritical  $\text{CO}_2$ .

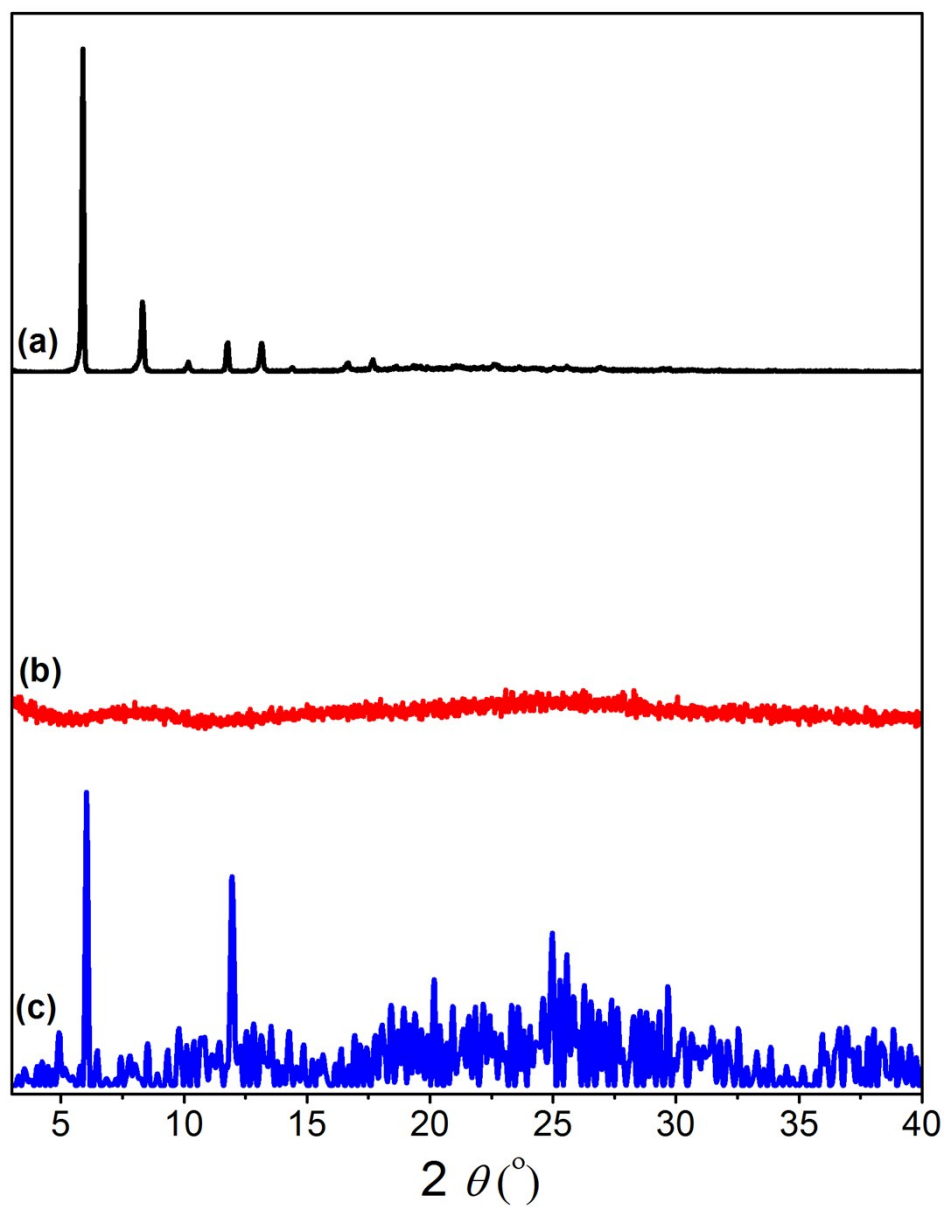

**Fig. S9** The PXR D patterns of SNU-170: (a) as-synthesized sample, (b) SNU-170' resulted from the treatment with supercritical  $\text{CO}_2$ , and (c) SNU-170' after immersed in DMF for 1 hour.

|                        |                      |                   |                                              |                        |                      |
|------------------------|----------------------|-------------------|----------------------------------------------|------------------------|----------------------|
| Acquisition Time (sec) | 5.3084               | Comment           | Zn_CVB_SMe_OMe_SCD/DMSO/DCI_lock_DMSO        | Date                   | 20 Jan 2014 18:36:00 |
| Date Stamp             | 20 Jan 2014 18:36:00 | File Name         | D:\SkyDrive\DATA\NMR\140120TKP\11\PDATA\111r | Origin                 | spect                |
| Frequency (MHz)        | 300.13               | Nucleus           | 1H                                           | Number of Transients   | 16                   |
| Original Points Count  | 32768                | Owner             | root                                         | Points Count           | 32768                |
| Receiver Gain          | 256.00               | SW(cyclical) (Hz) | 6172.84                                      | Solvent                | DMSO-d6              |
| Spectrum Type          | STANDARD             | Sweep Width (Hz)  | 6172.65                                      | Temperature (degree C) | 23.600               |
|                        |                      |                   |                                              | Pulse Sequence         | zg30                 |
|                        |                      |                   |                                              | Spectrum Offset (Hz)   | 1853.4263            |

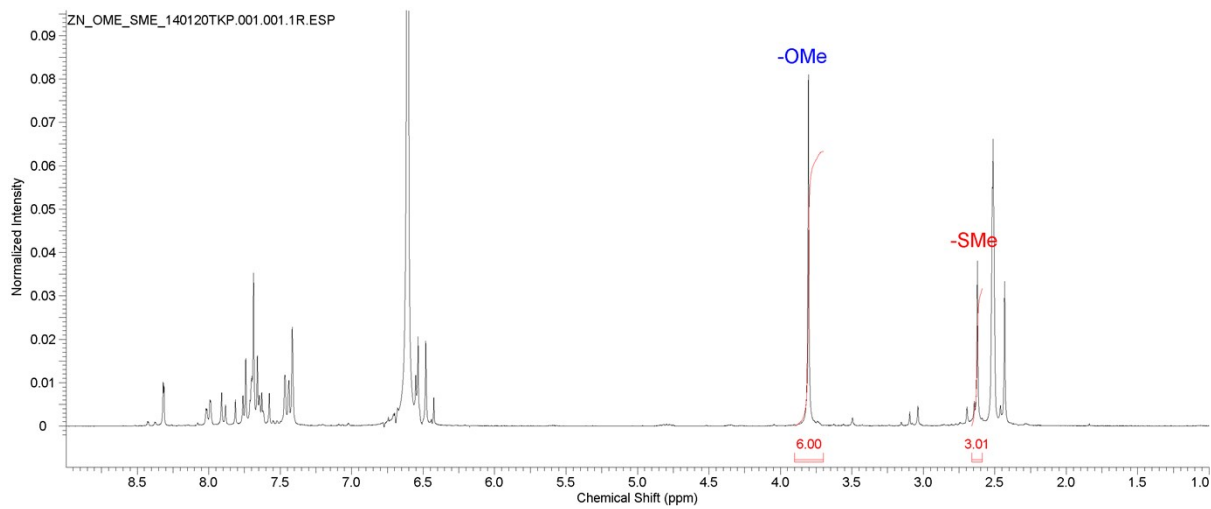

**Fig. S10** <sup>1</sup>H NMR spectrum of [Zn<sub>4</sub>O(CVB-SMe)<sub>1</sub>(CVB-OMe)<sub>2</sub>] (SNU-176') digested in DMSO-d<sub>6</sub>/DCI.

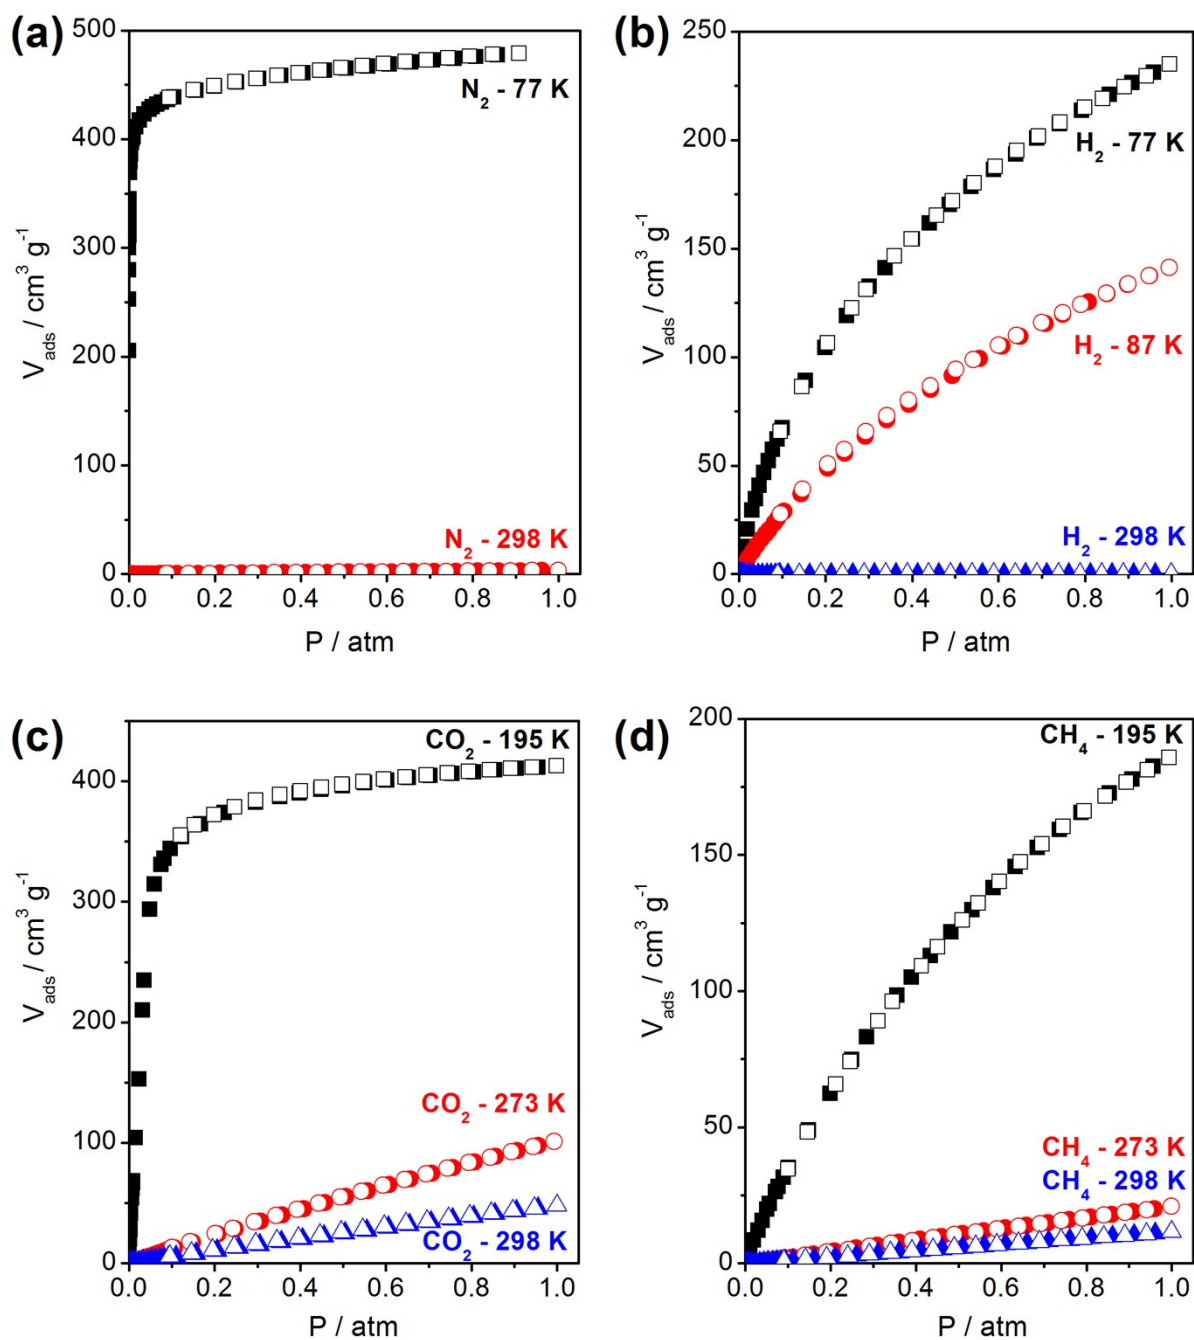

**Fig. S11** Gas adsorption isotherms of SNU-176': a)  $\text{N}_2$  at 77 K (black) and 298 K (red), b)  $\text{H}_2$  at 77 K (black), 87 K (red) and 298 K (blue), c)  $\text{CO}_2$  at 195 K (black), 273 K (red) and 298 K (blue), and d)  $\text{CH}_4$  at 195 K (black), 273 K (red), and 298 K (blue). Filled shapes: adsorption; open shapes: desorption

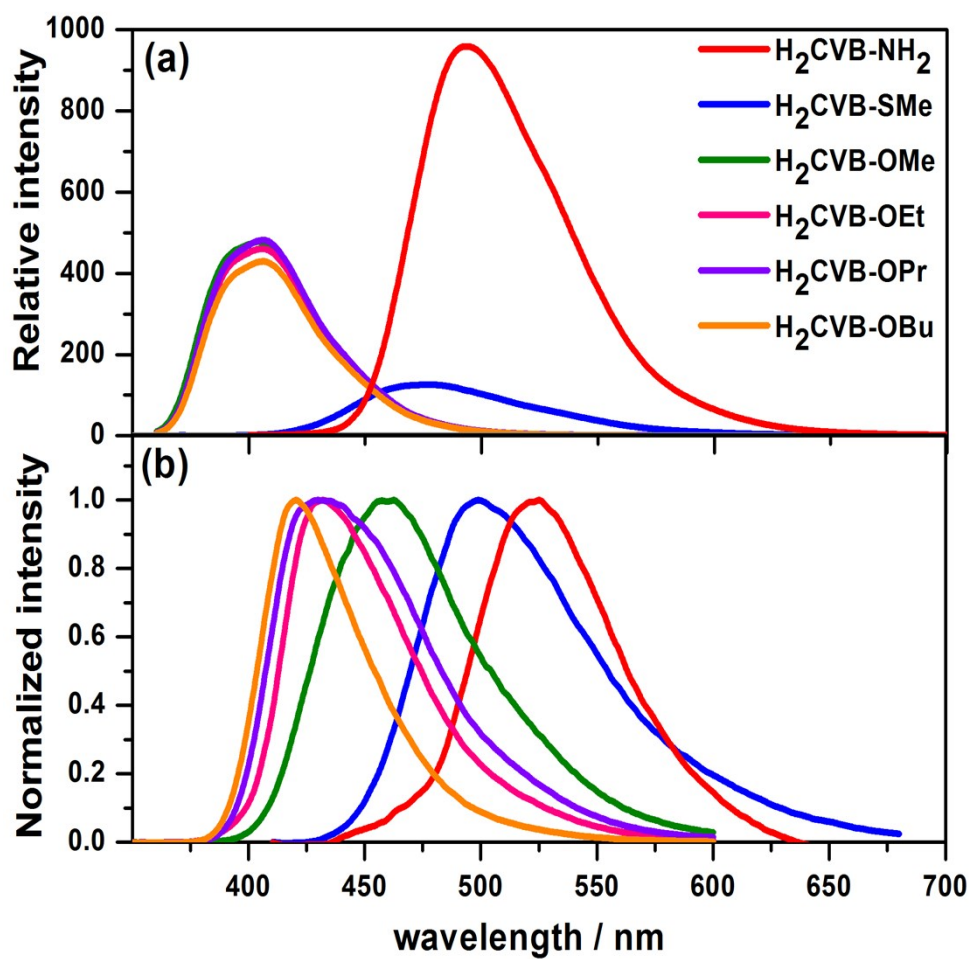

**Fig. S12** Photoluminescence spectra of various ligands: (a) In the DMF solution ( $1 \times 10^{-4}$  M), excitation at 395 nm for H<sub>2</sub>CVB-NH<sub>2</sub>, 362 nm for H<sub>2</sub>CVB-SMe, and 350 nm for the rest of the samples. (b) Pure solid, excitation at 360 nm for H<sub>2</sub>CVB-NH<sub>2</sub> and H<sub>2</sub>CVB-SMe, and 320 nm for the rest of the samples.

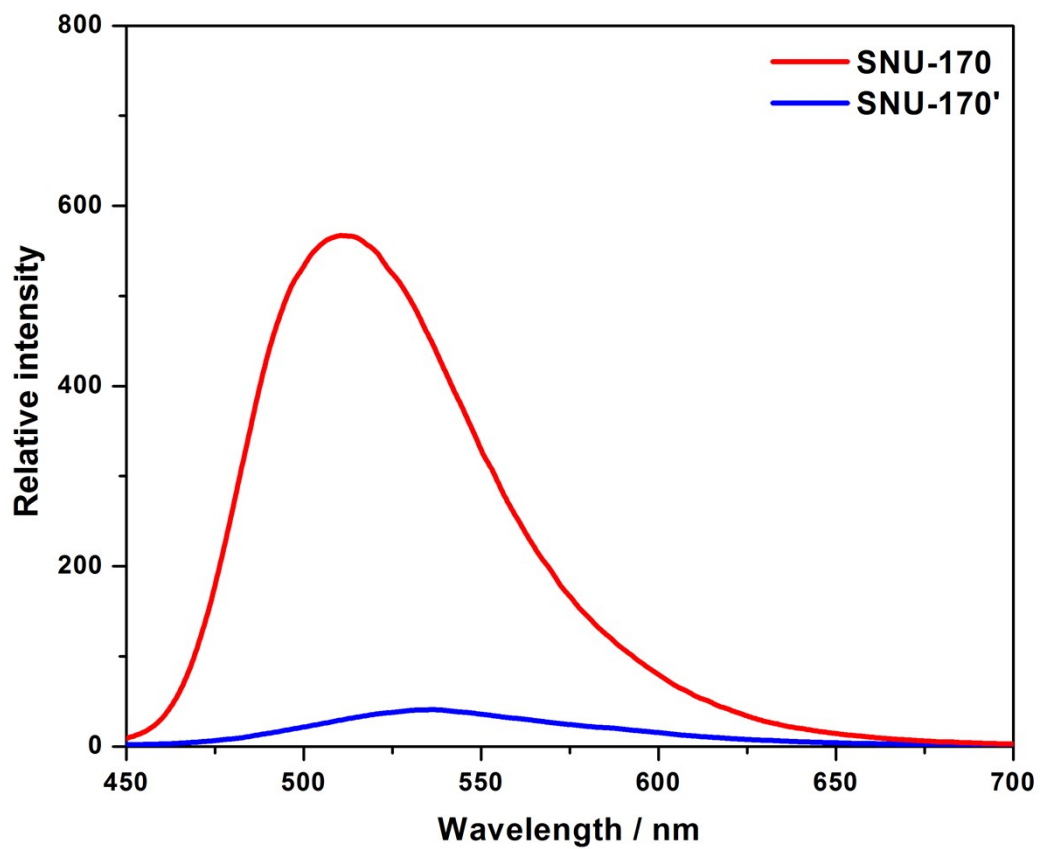

**Fig. S13** Comparison of the photoluminescence intensities of as-synthesized (SNU-170, red) and activated (SNU-170', blue) MOFs.

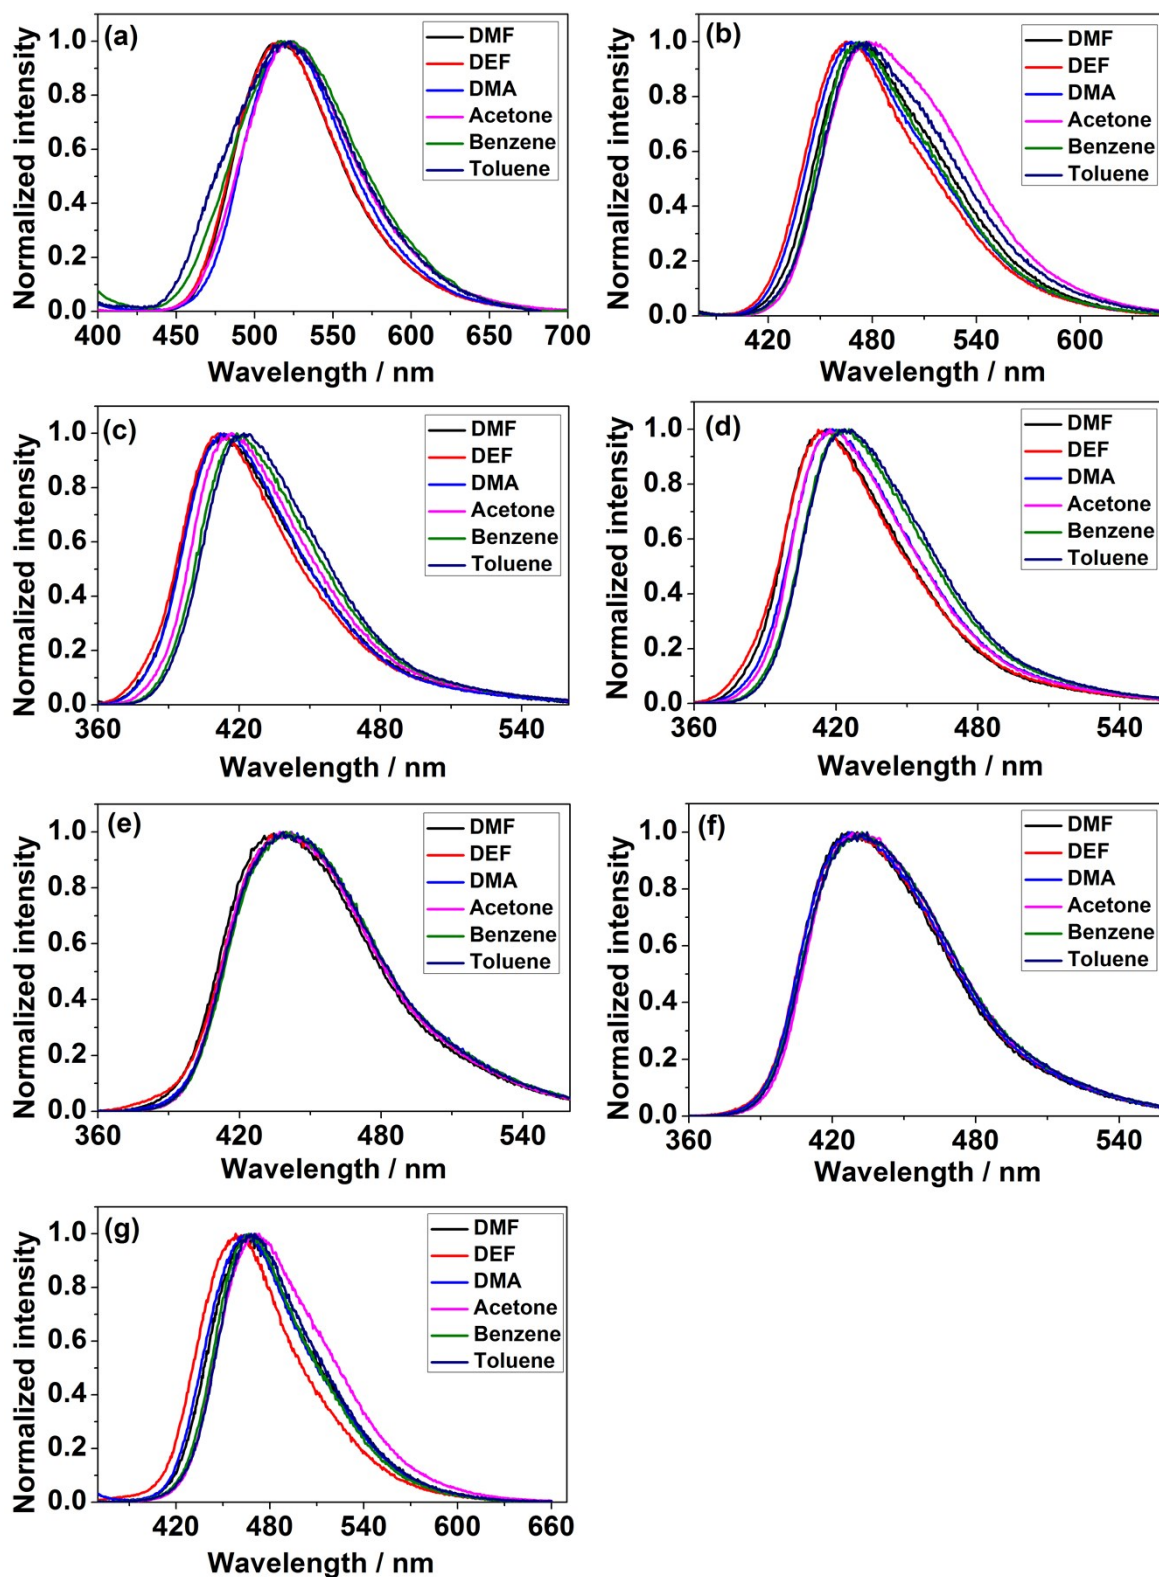

Fig. S14 Photoluminescence spectra changes of the activated MOFs on the addition of various solvents: (a) SNU-170', (b) SNU-171', (c) SNU-172', (d) SNU-173', (e) SNU-174', (f) SNU-175', and (g) SNU-176'.

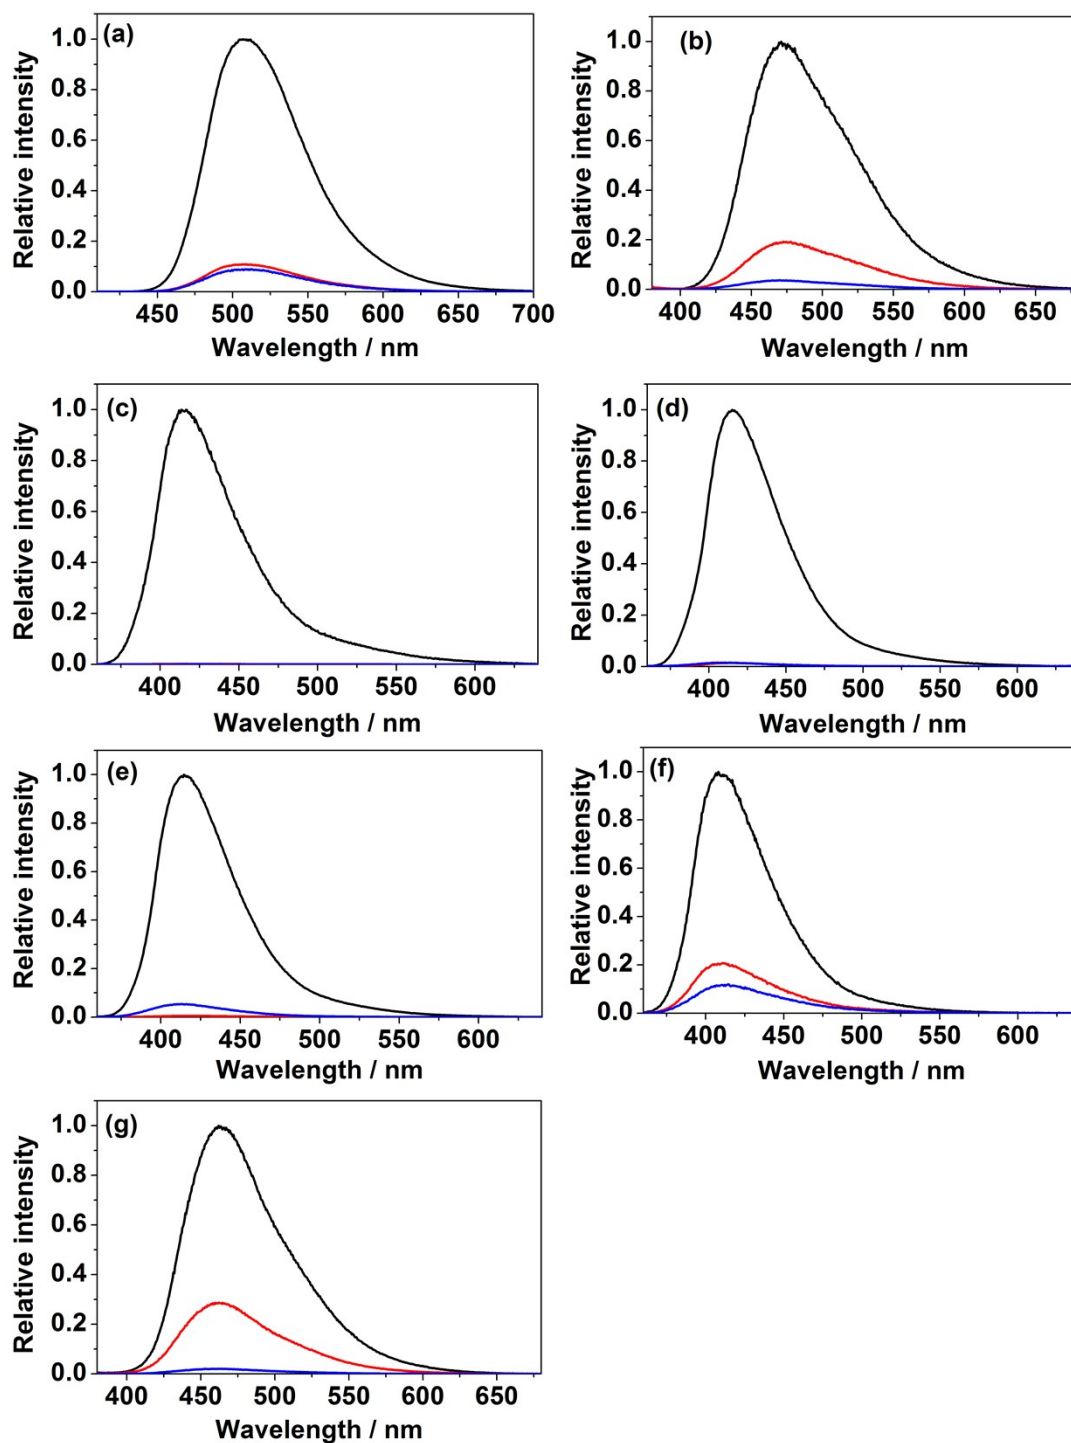

**Fig. S15** Changes of photoluminescence spectra of as-synthesized MOFs on the addition of a drop of 0.5 M DMF solution of nitrobenzene (NB) and 2,4-dinitrotoluene (DNT). Black, MOF; Red, MOF + NB; Blue, MOF + DNT: (a) SNU-170, (b) SNU-171, (c) SNU-172, (d) SNU-173, (e) SNU-174, (f) SNU-175, and (g) SNU-176.



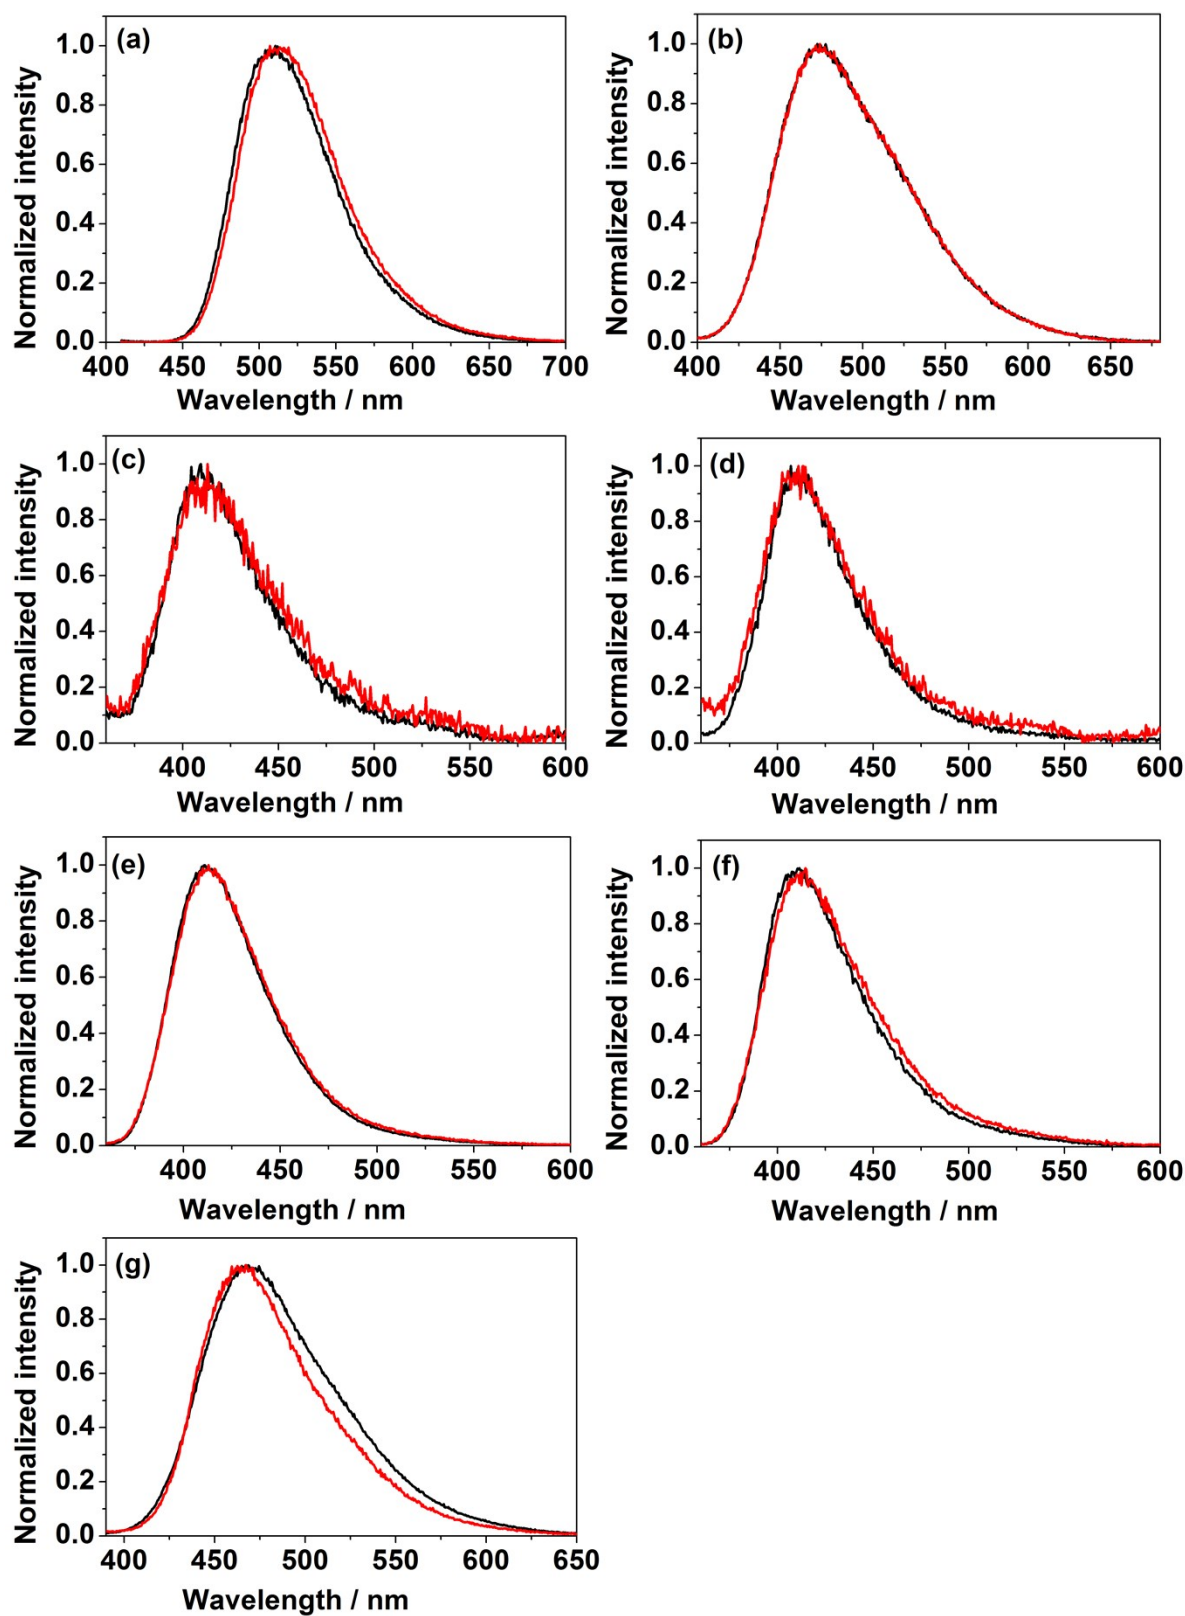

**Fig. S16** Normalized luminescence spectra of as-synthesized MOFs after the addition of a drop of 0.5 M DMF solution of nitrobenzene (NB) and 2,4-dinitrotoluene (DNT). Black: MOF + NB, Red: MOF + DNT. (a) SNU-170, (b) SNU-171, (c) SNU-172, (d) SNU-173, (e) SNU-174, (f) SNU-175, and (g) SNU-176.

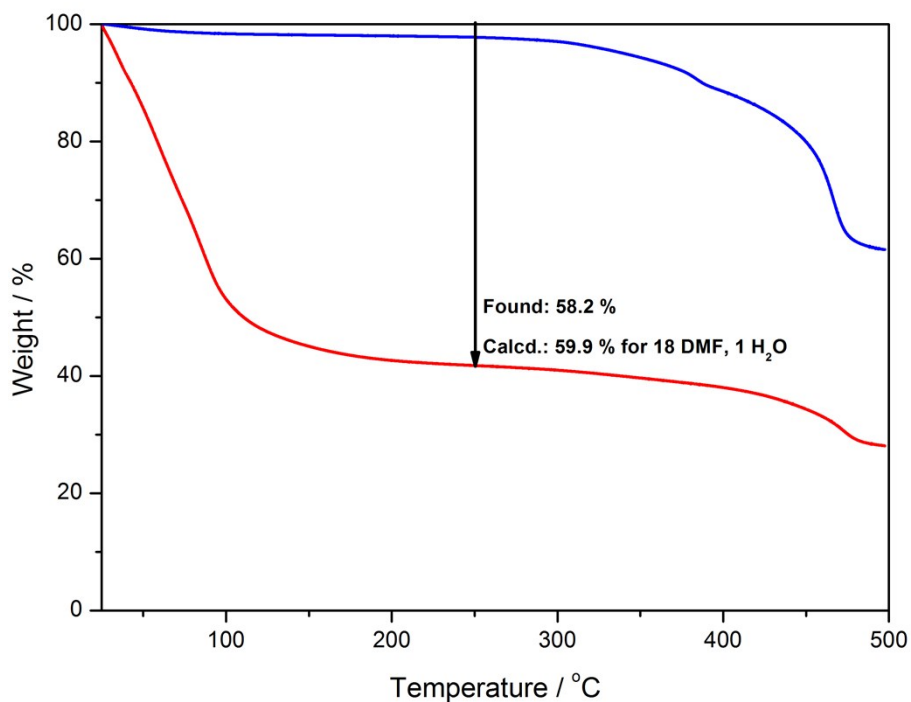

**Fig. S17** TGA curves of  $[\text{Zn}_4\text{O}(\text{CVB-NH}_2)_3] \cdot 18\text{DMF} \cdot \text{H}_2\text{O}$  (SNU-170, red) and its dried sample  $[\text{Zn}_4\text{O}(\text{CVB-NH}_2)_3]$  (SNU-171', blue) obtained by treatment with supercritical  $\text{CO}_2$ .

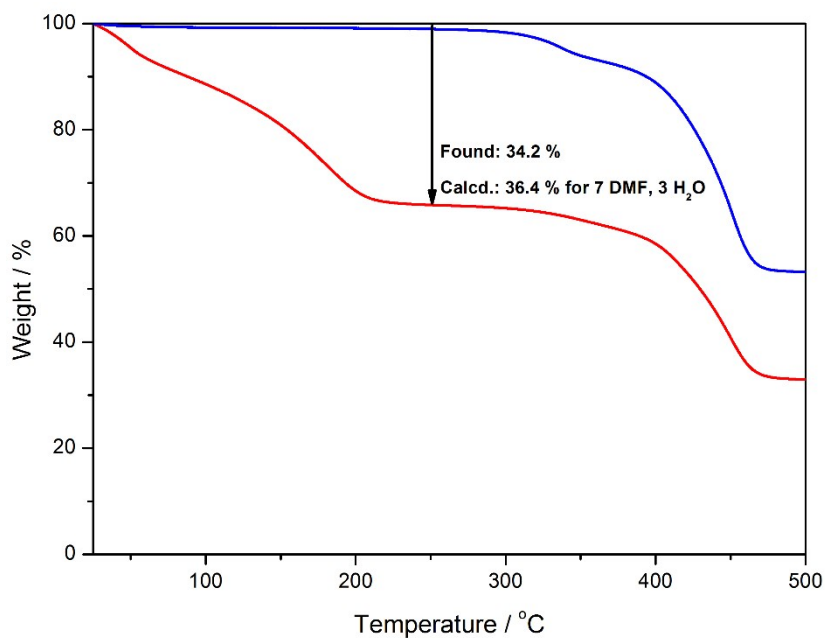

**Fig. S18** TGA curves of  $[\text{Zn}_4\text{O}(\text{CVB-SMe})_3] \cdot 7\text{DMF} \cdot 3\text{H}_2\text{O}$  (SNU-171, red) and its dried sample  $[\text{Zn}_4\text{O}(\text{CVB-SMe})_3]$  (SNU-171', blue) obtained by treatment with supercritical  $\text{CO}_2$ .

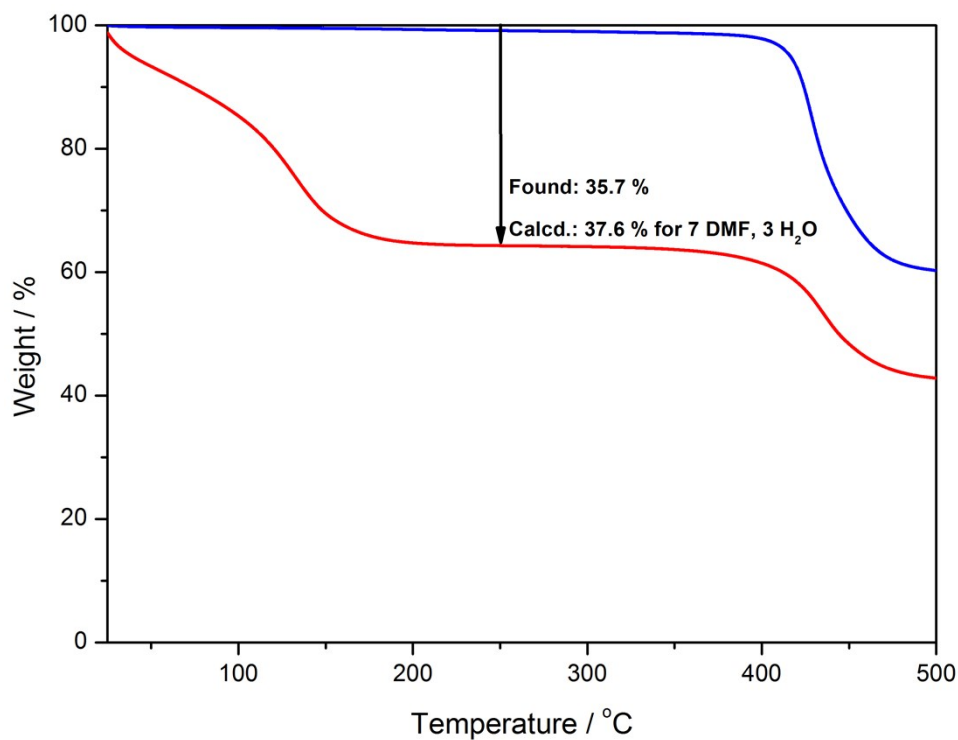

**Fig. S19** TGA curves of  $[\text{Zn}_4\text{O}(\text{CVB-OMe})_3] \cdot 7\text{DMF} \cdot 3 \text{H}_2\text{O}$  (SNU-172, red) and its dried sample  $[\text{Zn}_4\text{O}(\text{CVB-OMe})_3]$  (SNU-172', blue) obtained by treatment with supercritical  $\text{CO}_2$ .

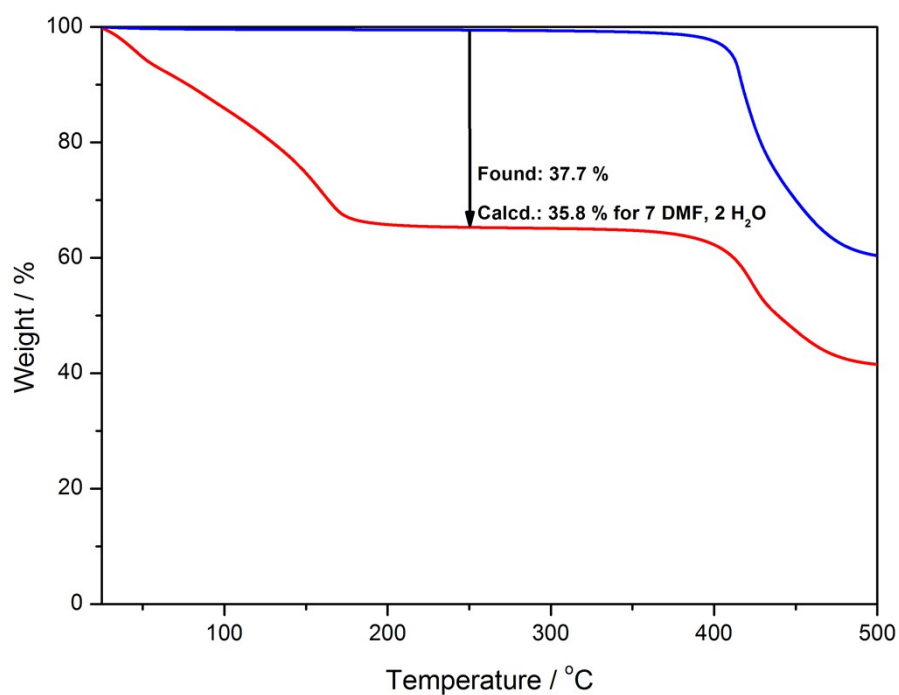

**Fig. S20** TGA curves of  $[\text{Zn}_4\text{O}(\text{CVB-OEt})_3] \cdot 7\text{DMF} \cdot 2\text{H}_2\text{O}$  (SNU-173, red) and its dried sample  $[\text{Zn}_4\text{O}(\text{CVB-OEt})_3]$  (SNU-173', blue) obtained by treatment with supercritical  $\text{CO}_2$ .

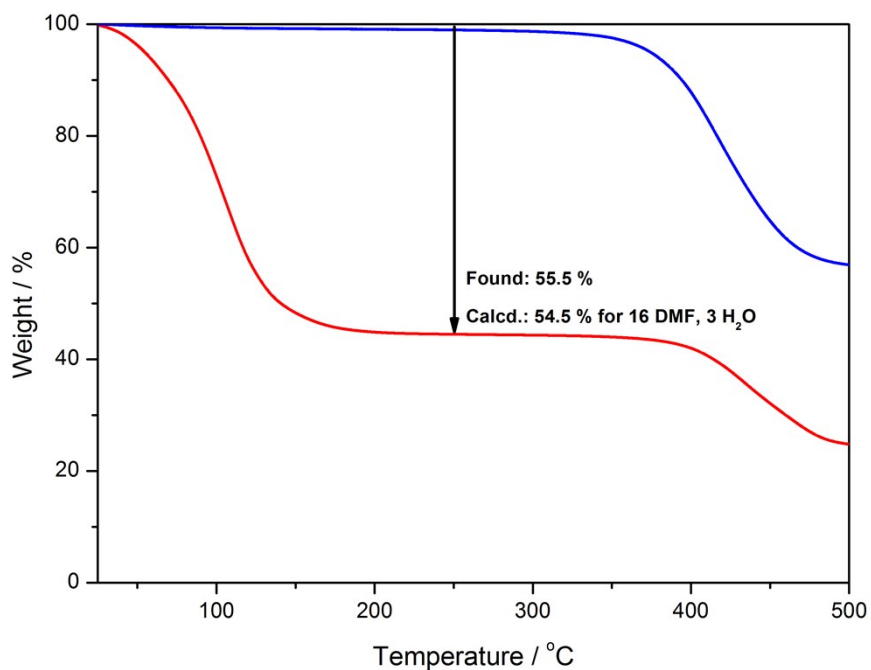

**Fig. S21** TGA curves of  $[\text{Zn}_4\text{O}(\text{CVB-OPr})_3] \cdot 16\text{DMF} \cdot 3\text{H}_2\text{O}$  (SNU-174, red) and its dried sample  $[\text{Zn}_4\text{O}(\text{CVB-OPr})_3]$  (SNU-174', blue) obtained by treatment with supercritical  $\text{CO}_2$ .

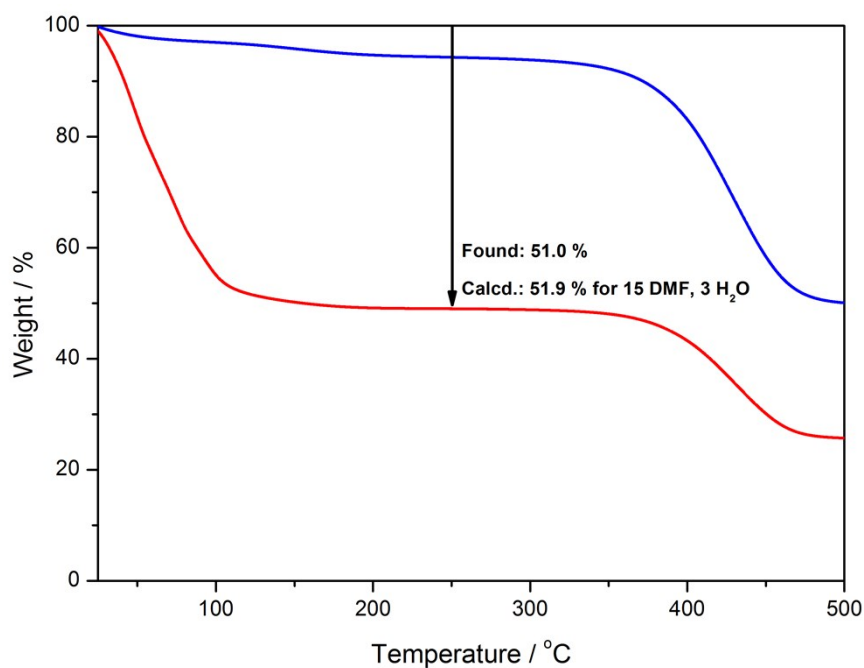

**Fig. S22** TGA curves of  $[\text{Zn}_4\text{O}(\text{CVB-OBu})_3] \cdot 15\text{DMF} \cdot 3\text{H}_2\text{O}$  (SNU-175, red) and its dried sample  $[\text{Zn}_4\text{O}(\text{CVB-OBu})_3]$  (SNU-175', blue) obtained by treatment with supercritical  $\text{CO}_2$ .

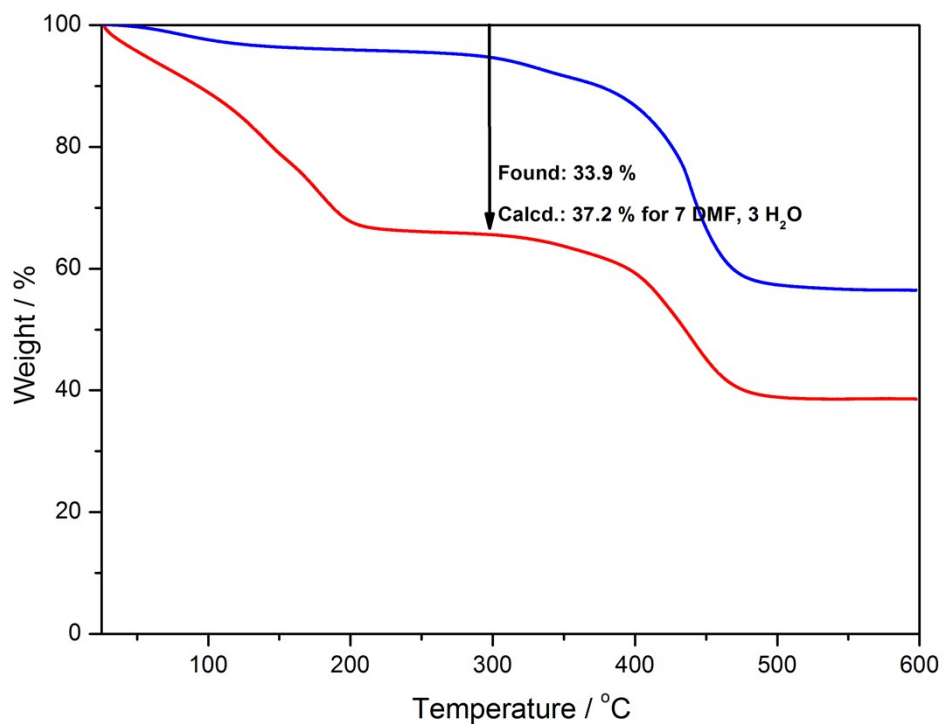

**Fig. S23** TGA curves of  $[\text{Zn}_4\text{O}(\text{CVB-SMe})_1(\text{CVB-OMe})_2]\cdot 7\text{DMF}\cdot 3\text{H}_2\text{O}$  (SNU-176, red) and its dried sample  $[\text{Zn}_4\text{O}(\text{CVB-SMe})_1(\text{CVB-OMe})_2]$  (SNU-176', blue) obtained by treatment with supercritical  $\text{CO}_2$ .

**Table S1.** Crystallographic data for **SNU-170 ~ SNU-174** (squeezed data)

|                                          | <b>SNU-170</b>                                                                    | <b>SNU-171</b>                                                                      | <b>SNU-172</b>                                                      | <b>SNU-173</b>                                                      | <b>SNU-174</b>                                                     |
|------------------------------------------|-----------------------------------------------------------------------------------|-------------------------------------------------------------------------------------|---------------------------------------------------------------------|---------------------------------------------------------------------|--------------------------------------------------------------------|
| formula                                  | C <sub>120</sub> H <sub>84</sub> N <sub>12</sub> O <sub>52</sub> Zn <sub>16</sub> | C <sub>264</sub> H <sub>192</sub> O <sub>104</sub> S <sub>24</sub> Zn <sub>32</sub> | C <sub>264</sub> H <sub>192</sub> O <sub>104</sub> Zn <sub>32</sub> | C <sub>288</sub> H <sub>240</sub> O <sub>104</sub> Zn <sub>32</sub> | C <sub>156</sub> H <sub>144</sub> O <sub>64</sub> Zn <sub>16</sub> |
| F.W.                                     | 3571.91                                                                           | 7889.44                                                                             | 7120.00                                                             | 7456.63                                                             | 4088.62                                                            |
| crystal system                           | cubic                                                                             | cubic                                                                               | cubic                                                               | cubic                                                               | cubic                                                              |
| space group                              | <i>Fm-3m</i>                                                                      | <i>Fd-3m</i>                                                                        | <i>Fd-3m</i>                                                        | <i>Fd-3</i>                                                         | <i>Fm-3m</i>                                                       |
| $\lambda$ (Å)                            | 0.70000                                                                           | 0.69998                                                                             | 0.69999                                                             | 0.70000                                                             | 0.70000                                                            |
| $a$ (Å)                                  | 30.197(10)                                                                        | 29.970(10)                                                                          | 30.089(3)                                                           | 30.222(10)                                                          | 30.206(10)                                                         |
| $V$ (Å <sup>3</sup> )                    | 27535(27)                                                                         | 26919(27)                                                                           | 27241(8)                                                            | 27604(27)                                                           | 27560(27)                                                          |
| $Z$                                      | 2                                                                                 | 2                                                                                   | 2                                                                   | 2                                                                   | 2                                                                  |
| $D_{calcd}$ (g cm <sup>-3</sup> )        | 0.431                                                                             | 0.973                                                                               | 0.868                                                               | 0.897                                                               | 0.493                                                              |
| $T$ (K)                                  | 293                                                                               | 293                                                                                 | 293                                                                 | 293                                                                 | 293                                                                |
| $GOF$ ( $F^2$ )                          | 1.344                                                                             | 1.429                                                                               | 1.174                                                               | 1.435                                                               | 1.229                                                              |
| $R_I$ [ $I > 2\sigma(I)$ ] <sup>a</sup>  | 0.0988                                                                            | 0.1334                                                                              | 0.1156                                                              | 0.1054                                                              | 0.0927                                                             |
| $wR_2$ [ $I > 2\sigma(I)$ ] <sup>b</sup> | 0.3146                                                                            | 0.3691                                                                              | 0.3886                                                              | 0.3617                                                              | 0.2909                                                             |

<sup>a</sup>  $R_1 = \sum(|F_o| - |F_c|) / \sum|F_o|$ ; <sup>b</sup>  $wR_2 = [\sum w(F_o^2 - F_c^2)^2 / \sum w(F_o^2)^2]^{1/2}$ ;  $w = 1/[\sigma^2(F_o^2) + (AP)^2 + (BP)]$ ,  $P = (F_o^2 + 2F_c^2)/3$ ; A = 0.2000, B = 0.0000 for **SNU-170**; A = 0.2000, B = 0.0000 for **SNU-171**; A = 0.2000, B = 0.0000 for **SNU-172**; A = 0.2000, B = 0.0000 for **SNU-173**; A = 0.2000, B = 0.0000 for **SNU-174**.

**Table S2.** CO<sub>2</sub> separation parameters for vacuum swing adsorption (VSA) process <sup>a</sup>

| Sample          | Gas mixtures                           | $N_I^{ads}$ (mol kg <sup>-1</sup> ) | $\Delta N_I$ (mol kg <sup>-1</sup> ) | $R$ (%) | $\alpha_{12}^{ads}$ | $S$  |
|-----------------|----------------------------------------|-------------------------------------|--------------------------------------|---------|---------------------|------|
| <b>SNU-170'</b> | CO <sub>2</sub> :CH <sub>4</sub> (1:1) | 0.465                               | 0.427                                | 91.8    | 4.00                | 7.00 |
|                 | CO <sub>2</sub> :N <sub>2</sub> (1:9)  | 0.082                               | 0.075                                | 92.2    | 7.73                | 7.06 |
| <b>SNU-171'</b> | CO <sub>2</sub> :CH <sub>4</sub> (1:1) | 1.042                               | 0.934                                | 89.6    | 2.86                | 14.0 |
|                 | CO <sub>2</sub> :N <sub>2</sub> (1:9)  | 0.216                               | 0.195                                | 89.9    | 13.97               | 20.9 |
| <b>SNU-172'</b> | CO <sub>2</sub> :CH <sub>4</sub> (1:1) | 1.104                               | 0.985                                | 89.2    | 4.35                | 16.6 |
|                 | CO <sub>2</sub> :N <sub>2</sub> (1:9)  | 0.235                               | 0.211                                | 89.7    | 14.9                | 22.6 |
| <b>SNU-173'</b> | CO <sub>2</sub> :CH <sub>4</sub> (1:1) | 1.271                               | 1.133                                | 89.1    | 4.69                | 15.0 |
|                 | CO <sub>2</sub> :N <sub>2</sub> (1:9)  | 0.274                               | 0.248                                | 90.1    | 17.09               | 13.2 |
| <b>SNU-174'</b> | CO <sub>2</sub> :CH <sub>4</sub> (1:1) | 0.335                               | 0.300                                | 89.5    | 4.50                | 6.8  |
|                 | CO <sub>2</sub> :N <sub>2</sub> (1:9)  | 0.070                               | 0.063                                | 90.1    | -                   | -    |
| <b>SNU-176'</b> | CO <sub>2</sub> :CH <sub>4</sub> (1:1) | 1.102                               | 0.989                                | 89.8    | 4.32                | 14.8 |
|                 | CO <sub>2</sub> :N <sub>2</sub> (1:9)  | 0.225                               | 0.205                                | 90.1    | 15.34               | 25.0 |

<sup>a</sup> Adsorption at 1 bar, Desorption at 0.1 bar.

**Table S3.** The photoluminescence spectra ( $\lambda_{max}$ , nm) of the activated MOFs on the addition of various solvents <sup>a</sup>

|                 | none | DMF | DEF | DMA | Acetone | Benzene | Toluene |
|-----------------|------|-----|-----|-----|---------|---------|---------|
| <b>SNU-170'</b> | 536  | 517 | 515 | 523 | 525     | 519     | 522     |
| <b>SNU-171'</b> | 482  | 473 | 468 | 468 | 478     | 473     | 477     |
| <b>SNU-172'</b> | 442  | 414 | 414 | 412 | 417     | 419     | 422     |
| <b>SNU-173'</b> | 440  | 416 | 417 | 419 | 418     | 426     | 424     |
| <b>SNU-174'</b> | 442  | 440 | 442 | 442 | 437     | 440     | 439     |
| <b>SNU-175'</b> | 440  | 427 | 427 | 428 | 433     | 433     | 435     |
| <b>SNU-176'</b> | 470  | 467 | 458 | 468 | 473     | 467     | 470     |

<sup>a</sup> A few drops of solvents were added to the activated MOFs. Measured at room temperature.

**Table S4.** N<sub>2</sub> adsorption data of SNU-170', SNU-171', SNU-172' and SNU-173' at 77 K.

| SNU-170' |                                                     | SNU-171' |                                                     | SNU-172' |                                                     | SNU-173' |                                                     |
|----------|-----------------------------------------------------|----------|-----------------------------------------------------|----------|-----------------------------------------------------|----------|-----------------------------------------------------|
| P (atm)  | V <sub>ads</sub> (cm <sup>3</sup> g <sup>-1</sup> ) | P (atm)  | V <sub>ads</sub> (cm <sup>3</sup> g <sup>-1</sup> ) | P (atm)  | V <sub>ads</sub> (cm <sup>3</sup> g <sup>-1</sup> ) | P (atm)  | V <sub>ads</sub> (cm <sup>3</sup> g <sup>-1</sup> ) |
| 9.91E-05 | 47.0311                                             | 8.66E-05 | 171.9842                                            | 1.75E-05 | 82.1943                                             | 3.66E-05 | 124.9302                                            |
| 1.99E-04 | 74.7807                                             | 1.79E-04 | 215.6568                                            | 1.18E-04 | 211.718                                             | 1.20E-04 | 197.6302                                            |
| 3.06E-04 | 94.5341                                             | 2.80E-04 | 243.2024                                            | 2.18E-04 | 242.882                                             | 2.28E-04 | 228.7104                                            |
| 4.04E-04 | 108.4955                                            | 3.82E-04 | 261.9872                                            | 3.23E-04 | 265.2492                                            | 3.23E-04 | 244.5093                                            |
| 5.13E-04 | 121.582                                             | 4.83E-04 | 275.5355                                            | 4.29E-04 | 278.2017                                            | 4.24E-04 | 255.7349                                            |
| 6.01E-04 | 130.5536                                            | 5.84E-04 | 285.1517                                            | 6.07E-04 | 292.1352                                            | 5.98E-04 | 268.1802                                            |
| 7.04E-04 | 139.8179                                            | 6.85E-04 | 293.7318                                            | 7.15E-04 | 298.0606                                            | 7.15E-04 | 274.2604                                            |
| 8.12E-04 | 148.5998                                            | 7.86E-04 | 300.0394                                            | 8.02E-04 | 302.0418                                            | 7.94E-04 | 277.6163                                            |
| 9.15E-04 | 156.3689                                            | 8.88E-04 | 305.2063                                            | 9.09E-04 | 306.0811                                            | 9.42E-04 | 282.8511                                            |
| 1.03E-03 | 164.0691                                            | 9.96E-04 | 310.2336                                            | 1.02E-03 | 309.5943                                            | 1.02E-03 | 285.3744                                            |
| 2.03E-03 | 221.7157                                            | 2.01E-03 | 332.4378                                            | 2.06E-03 | 328.8336                                            | 2.08E-03 | 304.2663                                            |
| 3.05E-03 | 268.8091                                            | 3.01E-03 | 342.2072                                            | 3.00E-03 | 337.5705                                            | 3.00E-03 | 312.7791                                            |
| 4.03E-03 | 307.9705                                            | 4.02E-03 | 348.2296                                            | 4.02E-03 | 343.6697                                            | 4.02E-03 | 319.1465                                            |
| 5.04E-03 | 343.2114                                            | 5.02E-03 | 352.4864                                            | 5.01E-03 | 347.9435                                            | 5.05E-03 | 323.843                                             |
| 7.46E-03 | 412.7773                                            | 6.04E-03 | 355.8298                                            | 7.02E-03 | 353.9934                                            | 6.78E-03 | 329.5965                                            |
| 7.41E-03 | 412.5682                                            | 7.04E-03 | 358.5073                                            | 7.02E-03 | 353.9992                                            | 7.66E-03 | 331.9256                                            |
| 8.70E-03 | 442.3341                                            | 8.10E-03 | 360.8586                                            | 8.60E-03 | 357.3828                                            | 8.34E-03 | 333.507                                             |
| 9.39E-03 | 457.7954                                            | 9.09E-03 | 362.7078                                            | 9.24E-03 | 358.5606                                            | 9.45E-03 | 335.8232                                            |
| 9.32E-03 | 459.6318                                            | 1.01E-02 | 364.2915                                            | 9.73E-03 | 359.3394                                            | 1.01E-02 | 336.8779                                            |
| 1.26E-02 | 526.8432                                            | 2.00E-02 | 374.0215                                            | 2.06E-02 | 370.6516                                            | 1.75E-02 | 346.4453                                            |
| 2.06E-02 | 705.1136                                            | 2.96E-02 | 379.4614                                            | 2.77E-02 | 374.768                                             | 3.18E-02 | 356.0023                                            |
| 2.90E-02 | 847.9409                                            | 4.05E-02 | 383.7227                                            | 3.80E-02 | 379.0311                                            | 4.04E-02 | 359.7884                                            |
| 4.10E-02 | 928.0523                                            | 5.23E-02 | 387.1162                                            | 4.62E-02 | 381.723                                             | 5.07E-02 | 363.2395                                            |
| 5.38E-02 | 957.1841                                            | 6.09E-02 | 389.1702                                            | 5.69E-02 | 384.3025                                            | 5.70E-02 | 365.0163                                            |
| 6.15E-02 | 967.7363                                            | 7.10E-02 | 391.209                                             | 7.04E-02 | 386.8795                                            | 7.09E-02 | 368.2361                                            |
| 7.19E-02 | 978.0909                                            | 8.13E-02 | 392.9915                                            | 7.71E-02 | 387.9557                                            | 8.07E-02 | 370.1454                                            |
| 8.32E-02 | 987.0023                                            | 8.94E-02 | 394.2643                                            | 8.62E-02 | 389.2672                                            | 9.09E-02 | 371.8453                                            |
| 1.01E-01 | 998.2523                                            | 1.06E-01 | 396.4699                                            | 1.02E-01 | 391.2541                                            | 1.05E-01 | 373.9325                                            |
| 1.32E-01 | 1012.4454                                           | 1.49E-01 | 401.0316                                            | 1.53E-01 | 396.2746                                            | 1.56E-01 | 379.5744                                            |
| 1.79E-01 | 1027.4501                                           | 2.00E-01 | 405.138                                             | 2.05E-01 | 399.9819                                            | 1.99E-01 | 383.0686                                            |
| 2.49E-01 | 1042.3182                                           | 2.51E-01 | 408.7576                                            | 2.50E-01 | 402.3574                                            | 2.50E-01 | 386.3651                                            |
| 3.04E-01 | 1051.6091                                           | 3.04E-01 | 411.7248                                            | 2.99E-01 | 404.8803                                            | 3.02E-01 | 388.9791                                            |
| 3.48E-01 | 1057.8068                                           | 3.55E-01 | 414.3022                                            | 3.51E-01 | 407.0369                                            | 3.54E-01 | 391.2709                                            |
| 3.98E-01 | 1064.175                                            | 4.06E-01 | 416.6383                                            | 4.02E-01 | 408.8918                                            | 4.04E-01 | 393.2186                                            |
| 4.51E-01 | 1069.3932                                           | 4.56E-01 | 418.7985                                            | 4.54E-01 | 410.5016                                            | 4.56E-01 | 394.8942                                            |
| 5.01E-01 | 1074.3613                                           | 5.06E-01 | 420.8374                                            | 5.04E-01 | 412.1008                                            | 5.06E-01 | 396.4628                                            |
| 5.53E-01 | 1078.7318                                           | 5.57E-01 | 422.7594                                            | 5.55E-01 | 413.5402                                            | 5.57E-01 | 397.7907                                            |
| 6.03E-01 | 1082.8114                                           | 6.07E-01 | 424.6056                                            | 6.05E-01 | 414.923                                             | 6.07E-01 | 399.1116                                            |
| 6.54E-01 | 1086.5409                                           | 6.57E-01 | 426.3895                                            | 6.56E-01 | 416.1024                                            | 6.58E-01 | 400.2419                                            |
| 7.05E-01 | 1089.8182                                           | 7.08E-01 | 428.1083                                            | 7.06E-01 | 417.2369                                            | 7.07E-01 | 401.3244                                            |
| 7.55E-01 | 1092.9319                                           | 7.58E-01 | 429.8013                                            | 7.56E-01 | 418.3737                                            | 7.58E-01 | 402.3791                                            |
| 8.02E-01 | 1097.0205                                           | 8.08E-01 | 431.4563                                            | 8.07E-01 | 419.4828                                            | 8.08E-01 | 403.2895                                            |
| 8.55E-01 | 1100.2181                                           | 8.58E-01 | 433.1068                                            | 8.56E-01 | 420.5131                                            | 8.58E-01 | 404.3767                                            |
| 9.06E-01 | 1102.9773                                           | 9.04E-01 | 435.4429                                            | 9.07E-01 | 421.5533                                            | 9.08E-01 | 404.9837                                            |



**Table S5.** N<sub>2</sub> adsorption data of SNU-174', SNU-175' and SNU-176' at 77 K.

| SNU-174' |                                                     | SNU-175' |                                                     | SNU-176' |                                                     |
|----------|-----------------------------------------------------|----------|-----------------------------------------------------|----------|-----------------------------------------------------|
| P (atm)  | V <sub>ads</sub> (cm <sup>3</sup> g <sup>-1</sup> ) | P (atm)  | V <sub>ads</sub> (cm <sup>3</sup> g <sup>-1</sup> ) | P (atm)  | V <sub>ads</sub> (cm <sup>3</sup> g <sup>-1</sup> ) |
| 8.66E-05 | 17.0289                                             | 9.60E-05 | 1.6617                                              | 1.00E-04 | 205.3386                                            |
| 1.86E-04 | 22.8088                                             | 2.09E-04 | 1.8787                                              | 1.94E-04 | 252.3943                                            |
| 2.88E-04 | 26.6626                                             | 3.27E-04 | 1.9311                                              | 2.97E-04 | 279.6057                                            |
| 3.90E-04 | 29.6033                                             | 4.12E-04 | 1.9453                                              | 4.11E-04 | 299.94                                              |
| 4.91E-04 | 32.0953                                             | 5.27E-04 | 1.9541                                              | 4.98E-04 | 311.0529                                            |
| 5.92E-04 | 34.3031                                             | 6.21E-04 | 1.9588                                              | 6.06E-04 | 321.6514                                            |
| 6.92E-04 | 36.2252                                             | 7.32E-04 | 1.9626                                              | 7.01E-04 | 328.8214                                            |
| 7.94E-04 | 37.9542                                             | 8.29E-04 | 1.9652                                              | 8.10E-04 | 335.6                                               |
| 8.94E-04 | 39.7491                                             | 9.23E-04 | 1.9672                                              | 9.27E-04 | 341.3828                                            |
| 9.95E-04 | 41.792                                              | 1.01E-03 | 1.972                                               | 1.00E-03 | 344.7314                                            |
| 2.00E-03 | 54.3438                                             | 2.12E-03 | 1.9922                                              | 2.06E-03 | 369.0614                                            |
| 3.00E-03 | 63.2632                                             | 3.18E-03 | 2.0129                                              | 3.00E-03 | 379.0186                                            |
| 4.00E-03 | 70.1323                                             | 4.23E-03 | 2.0323                                              | 4.08E-03 | 386.0043                                            |
| 5.00E-03 | 75.6538                                             | 5.28E-03 | 2.0513                                              | 5.02E-03 | 390.2943                                            |
| 6.02E-03 | 80.401                                              | 6.33E-03 | 2.0707                                              | 7.06E-03 | 396.8128                                            |
| 7.03E-03 | 84.3986                                             | 7.37E-03 | 2.0884                                              | 7.06E-03 | 396.8414                                            |
| 8.02E-03 | 87.7705                                             | 8.42E-03 | 2.1181                                              | 8.61E-03 | 400.37                                              |
| 9.01E-03 | 90.8667                                             | 9.47E-03 | 2.1409                                              | 9.27E-03 | 401.6571                                            |
| 1.00E-02 | 93.6374                                             | 1.05E-02 | 2.1648                                              | 1.02E-02 | 402.6757                                            |
| 1.91E-02 | 107.4798                                            | 2.12E-02 | 2.6631                                              | 1.66E-02 | 410.9485                                            |
| 2.93E-02 | 118.547                                             | 3.26E-02 | 2.9256                                              | 2.48E-02 | 417.2614                                            |
| 4.23E-02 | 124.5879                                            | 4.27E-02 | 3.0827                                              | 3.60E-02 | 422.9214                                            |
| 5.44E-02 | 127.4609                                            | 5.28E-02 | 3.1892                                              | 4.74E-02 | 427.1014                                            |
| 6.01E-02 | 128.6133                                            | 6.29E-02 | 3.2801                                              | 5.55E-02 | 429.4371                                            |
| 6.95E-02 | 130.019                                             | 7.29E-02 | 3.3666                                              | 6.53E-02 | 431.7928                                            |
| 7.99E-02 | 131.3354                                            | 8.27E-02 | 3.5438                                              | 7.61E-02 | 433.9014                                            |
| 9.03E-02 | 132.4697                                            | 9.29E-02 | 3.6256                                              | 9.06E-02 | 436.25                                              |
| 1.08E-01 | 134.0628                                            | 1.12E-01 | 3.7938                                              | 1.05E-01 | 438.4586                                            |
| 1.55E-01 | 137.1626                                            | 1.61E-01 | 4.1936                                              | 1.56E-01 | 444.3986                                            |
| 2.06E-01 | 139.8839                                            | 2.12E-01 | 4.6074                                              | 2.00E-01 | 448.3786                                            |
| 2.57E-01 | 142.3088                                            | 2.61E-01 | 5.0818                                              | 2.51E-01 | 452.05                                              |
| 3.07E-01 | 144.4787                                            | 3.11E-01 | 5.5457                                              | 3.02E-01 | 455.2885                                            |
| 3.56E-01 | 146.9241                                            | 3.61E-01 | 6.0552                                              | 3.54E-01 | 458.1229                                            |
| 4.08E-01 | 148.9554                                            | 4.11E-01 | 6.5848                                              | 4.05E-01 | 460.6386                                            |
| 4.58E-01 | 150.8744                                            | 4.61E-01 | 7.1404                                              | 4.56E-01 | 462.8614                                            |
| 5.08E-01 | 152.7395                                            | 5.11E-01 | 7.699                                               | 5.06E-01 | 465.0128                                            |
| 5.58E-01 | 154.5748                                            | 5.62E-01 | 8.2023                                              | 5.56E-01 | 467.0057                                            |
| 6.09E-01 | 156.3697                                            | 6.10E-01 | 9.5607                                              | 6.06E-01 | 468.9543                                            |
| 6.59E-01 | 158.1679                                            | 6.61E-01 | 10.334                                              | 6.57E-01 | 470.6943                                            |
| 7.09E-01 | 159.9405                                            | 7.11E-01 | 11.0033                                             | 7.07E-01 | 472.3871                                            |
| 7.59E-01 | 161.7051                                            | 7.61E-01 | 11.7465                                             | 7.57E-01 | 474.0114                                            |
| 8.09E-01 | 163.5327                                            | 8.11E-01 | 12.5533                                             | 8.07E-01 | 475.6386                                            |
| 8.59E-01 | 165.3335                                            | 8.62E-01 | 13.1973                                             | 8.57E-01 | 477.1871                                            |
| 9.09E-01 | 167.2337                                            | 9.11E-01 | 14.1541                                             | 9.08E-01 | 478.6314                                            |

**Table S6.** N<sub>2</sub> adsorption data of SNU-170', SNU-171', SNU-172' and SNU-173' at 298 K.

| SNU-170' |                                                     | SNU-171' |                                                     | SNU-172' |                                                     | SNU-173' |                                                     |
|----------|-----------------------------------------------------|----------|-----------------------------------------------------|----------|-----------------------------------------------------|----------|-----------------------------------------------------|
| P (atm)  | V <sub>ads</sub> (cm <sup>3</sup> g <sup>-1</sup> ) | P (atm)  | V <sub>ads</sub> (cm <sup>3</sup> g <sup>-1</sup> ) | P (atm)  | V <sub>ads</sub> (cm <sup>3</sup> g <sup>-1</sup> ) | P (atm)  | V <sub>ads</sub> (cm <sup>3</sup> g <sup>-1</sup> ) |
| 3.30E-02 | 0.0011                                              | 2.28E-02 | 0.0075                                              | 4.08E-03 | 0.0002                                              | 7.29E-02 | 0.0052                                              |
| 4.30E-02 | 0.0255                                              | 3.29E-02 | 0.0508                                              | 5.06E-03 | 0.0033                                              | 8.30E-02 | 0.0432                                              |
| 5.30E-02 | 0.0513                                              | 4.27E-02 | 0.0852                                              | 6.11E-03 | 0.0068                                              | 9.29E-02 | 0.0789                                              |
| 6.30E-02 | 0.0809                                              | 5.29E-02 | 0.1284                                              | 7.11E-03 | 0.0102                                              | 1.12E-01 | 0.1424                                              |
| 7.29E-02 | 0.1152                                              | 6.28E-02 | 0.1719                                              | 9.38E-03 | 0.0186                                              | 1.61E-01 | 0.3178                                              |
| 8.29E-02 | 0.144                                               | 7.26E-02 | 0.2304                                              | 1.00E-02 | 0.0207                                              | 2.11E-01 | 0.5152                                              |
| 9.29E-02 | 0.1737                                              | 8.28E-02 | 0.2641                                              | 1.33E-02 | 0.0217                                              | 2.62E-01 | 0.7014                                              |
| 1.12E-01 | 0.2138                                              | 9.29E-02 | 0.3134                                              | 2.24E-02 | 0.0522                                              | 3.11E-01 | 0.8796                                              |
| 1.62E-01 | 0.3487                                              | 1.12E-01 | 0.3848                                              | 3.30E-02 | 0.0871                                              | 3.61E-01 | 1.0797                                              |
| 2.11E-01 | 0.5023                                              | 1.61E-01 | 0.5786                                              | 4.29E-02 | 0.1203                                              | 4.11E-01 | 1.2759                                              |
| 2.62E-01 | 0.6251                                              | 2.11E-01 | 0.8171                                              | 5.29E-02 | 0.1587                                              | 4.62E-01 | 1.458                                               |
| 3.12E-01 | 0.7663                                              | 2.61E-01 | 0.9536                                              | 6.29E-02 | 0.1952                                              | 5.11E-01 | 1.6554                                              |
| 3.62E-01 | 0.8801                                              | 3.11E-01 | 1.1426                                              | 7.29E-02 | 0.2361                                              | 5.61E-01 | 1.8601                                              |
| 4.11E-01 | 1.0152                                              | 3.62E-01 | 1.3735                                              | 8.28E-02 | 0.2759                                              | 6.11E-01 | 2.0655                                              |
| 4.62E-01 | 1.1169                                              | 4.11E-01 | 1.5507                                              | 9.26E-02 | 0.3169                                              | 6.61E-01 | 2.252                                               |
| 5.11E-01 | 1.2403                                              | 4.61E-01 | 1.6533                                              | 1.12E-01 | 0.3876                                              | 7.11E-01 | 2.4535                                              |
| 5.62E-01 | 1.3437                                              | 5.11E-01 | 1.8813                                              | 1.61E-01 | 0.5681                                              | 7.61E-01 | 2.6652                                              |
| 6.12E-01 | 1.4722                                              | 5.61E-01 | 1.9728                                              | 2.11E-01 | 0.7661                                              | 8.11E-01 | 2.8787                                              |
| 6.61E-01 | 1.5697                                              | 6.11E-01 | 2.1871                                              | 2.61E-01 | 0.9387                                              | 8.62E-01 | 3.0583                                              |
| 7.11E-01 | 1.7132                                              | 6.61E-01 | 2.3013                                              | 3.11E-01 | 1.1216                                              | 9.11E-01 | 3.2815                                              |
| 7.62E-01 | 1.8175                                              | 7.11E-01 | 2.5233                                              | 3.61E-01 | 1.2897                                              | 9.61E-01 | 3.4979                                              |
| 8.11E-01 | 1.9016                                              | 7.61E-01 | 2.6529                                              | 4.11E-01 | 1.4707                                              | 9.99E-01 | 3.6719                                              |
| 8.61E-01 | 2.0094                                              | 8.11E-01 | 2.8253                                              | 4.61E-01 | 1.6332                                              |          |                                                     |
| 9.11E-01 | 2.139                                               | 8.62E-01 | 3.0401                                              | 5.11E-01 | 1.8168                                              |          |                                                     |
| 9.61E-01 | 2.2821                                              | 9.11E-01 | 3.1335                                              | 5.61E-01 | 1.9835                                              |          |                                                     |
| 9.99E-01 | 2.4144                                              | 9.61E-01 | 3.3689                                              | 6.11E-01 | 2.1748                                              |          |                                                     |
|          |                                                     | 9.99E-01 | 3.4261                                              | 6.61E-01 | 2.3394                                              |          |                                                     |
|          |                                                     |          |                                                     | 7.11E-01 | 2.5237                                              |          |                                                     |
|          |                                                     |          |                                                     | 7.61E-01 | 2.6968                                              |          |                                                     |
|          |                                                     |          |                                                     | 8.10E-01 | 2.879                                               |          |                                                     |
|          |                                                     |          |                                                     | 8.61E-01 | 3.0514                                              |          |                                                     |
|          |                                                     |          |                                                     | 9.10E-01 | 3.2204                                              |          |                                                     |
|          |                                                     |          |                                                     | 9.61E-01 | 3.4014                                              |          |                                                     |
|          |                                                     |          |                                                     | 9.99E-01 | 3.5502                                              |          |                                                     |

**Table S7.** N<sub>2</sub> adsorption data of SNU-174', SNU-175' and SNU-176' at 298 K.

| SNU-174' |                                                     | SNU-175' |                                                     | SNU-176' |                                                     |
|----------|-----------------------------------------------------|----------|-----------------------------------------------------|----------|-----------------------------------------------------|
| P (atm)  | V <sub>ads</sub> (cm <sup>3</sup> g <sup>-1</sup> ) | P (atm)  | V <sub>ads</sub> (cm <sup>3</sup> g <sup>-1</sup> ) | P (atm)  | V <sub>ads</sub> (cm <sup>3</sup> g <sup>-1</sup> ) |
| 5.62E-01 | 0.018                                               | Nil      | Nil                                                 | 3.31E-02 | 0.0269                                              |
| 6.12E-01 | 0.0779                                              |          |                                                     | 4.31E-02 | 0.0611                                              |
| 6.62E-01 | 0.1253                                              |          |                                                     | 5.31E-02 | 0.0992                                              |
| 7.12E-01 | 0.1927                                              |          |                                                     | 6.30E-02 | 0.139                                               |
| 7.62E-01 | 0.2524                                              |          |                                                     | 7.29E-02 | 0.1858                                              |
| 8.12E-01 | 0.3412                                              |          |                                                     | 8.27E-02 | 0.2318                                              |
| 8.62E-01 | 0.4042                                              |          |                                                     | 9.28E-02 | 0.2805                                              |
| 9.12E-01 | 0.4972                                              |          |                                                     | 1.12E-01 | 0.358                                               |
| 9.62E-01 | 0.5784                                              |          |                                                     | 1.61E-01 | 0.5371                                              |
| 9.99E-01 | 0.6359                                              |          |                                                     | 2.11E-01 | 0.7449                                              |
|          |                                                     |          |                                                     | 2.61E-01 | 0.9054                                              |
|          |                                                     |          |                                                     | 3.11E-01 | 1.1029                                              |
|          |                                                     |          |                                                     | 3.61E-01 | 1.2479                                              |
|          |                                                     |          |                                                     | 4.11E-01 | 1.4421                                              |
|          |                                                     |          |                                                     | 4.61E-01 | 1.5524                                              |
|          |                                                     |          |                                                     | 5.11E-01 | 1.7099                                              |
|          |                                                     |          |                                                     | 5.61E-01 | 1.8763                                              |
|          |                                                     |          |                                                     | 6.11E-01 | 2.0132                                              |
|          |                                                     |          |                                                     | 6.61E-01 | 2.1408                                              |
|          |                                                     |          |                                                     | 7.11E-01 | 2.3474                                              |
|          |                                                     |          |                                                     | 7.61E-01 | 2.4608                                              |
|          |                                                     |          |                                                     | 8.11E-01 | 2.6712                                              |
|          |                                                     |          |                                                     | 8.61E-01 | 2.8492                                              |
|          |                                                     |          |                                                     | 9.11E-01 | 2.9597                                              |
|          |                                                     |          |                                                     | 9.61E-01 | 3.1163                                              |
|          |                                                     |          |                                                     | 9.99E-01 | 3.3782                                              |

**Table S8.** H<sub>2</sub> adsorption data of SNU-170', SNU-171', SNU-172' and SNU-173' at 77 K.

| SNU-170' |                                                     | SNU-171' |                                                     | SNU-172' |                                                     | SNU-173' |                                                     |
|----------|-----------------------------------------------------|----------|-----------------------------------------------------|----------|-----------------------------------------------------|----------|-----------------------------------------------------|
| P (atm)  | V <sub>ads</sub> (cm <sup>3</sup> g <sup>-1</sup> ) | P (atm)  | V <sub>ads</sub> (cm <sup>3</sup> g <sup>-1</sup> ) | P (atm)  | V <sub>ads</sub> (cm <sup>3</sup> g <sup>-1</sup> ) | P (atm)  | V <sub>ads</sub> (cm <sup>3</sup> g <sup>-1</sup> ) |
| 2.27E-04 | 0.8189                                              | 9.68E-05 | 0.1239                                              | 2.03E-04 | 0.2844                                              | 2.23E-04 | 0.8111                                              |
| 2.27E-04 | 0.8181                                              | 3.34E-04 | 0.5259                                              | 2.05E-04 | 0.288                                               | 2.23E-04 | 0.812                                               |
| 2.93E-04 | 0.8382                                              | 3.34E-04 | 0.5259                                              | 4.43E-04 | 0.6709                                              | 4.40E-04 | 1.6452                                              |
| 4.39E-04 | 0.8792                                              | 4.03E-04 | 0.6332                                              | 4.41E-04 | 0.6693                                              | 4.38E-04 | 1.6421                                              |
| 5.06E-04 | 0.8971                                              | 4.95E-04 | 0.7782                                              | 6.71E-04 | 1.0245                                              | 6.66E-04 | 2.4423                                              |
| 6.38E-04 | 0.931                                               | 5.94E-04 | 0.9328                                              | 6.67E-04 | 1.0199                                              | 6.63E-04 | 2.4334                                              |
| 7.07E-04 | 0.9485                                              | 6.95E-04 | 1.0861                                              | 8.80E-04 | 1.3412                                              | 8.93E-04 | 3.1731                                              |
| 8.38E-04 | 0.9816                                              | 7.96E-04 | 1.2383                                              | 8.76E-04 | 1.3359                                              | 8.88E-04 | 3.1583                                              |
| 8.99E-04 | 0.9963                                              | 8.98E-04 | 1.388                                               | 8.95E-04 | 1.3627                                              | 8.97E-04 | 3.1829                                              |
| 1.05E-03 | 1.0342                                              | 1.00E-03 | 1.5357                                              | 1.15E-03 | 1.7446                                              | 1.18E-03 | 4.0228                                              |
| 2.07E-03 | 1.3183                                              | 2.49E-03 | 3.4764                                              | 2.21E-03 | 3.2145                                              | 2.16E-03 | 6.5159                                              |
| 3.11E-03 | 1.6012                                              | 3.58E-03 | 4.7468                                              | 3.07E-03 | 4.3368                                              | 3.26E-03 | 8.7473                                              |
| 4.00E-03 | 1.8437                                              | 4.57E-03 | 5.8439                                              | 4.04E-03 | 5.5274                                              | 4.08E-03 | 10.2032                                             |
| 5.03E-03 | 2.1207                                              | 5.56E-03 | 6.8947                                              | 5.08E-03 | 6.7481                                              | 5.14E-03 | 11.8501                                             |
| 6.18E-03 | 2.4276                                              | 6.54E-03 | 7.8765                                              | 6.38E-03 | 8.1815                                              | 6.22E-03 | 13.3686                                             |
| 7.11E-03 | 2.6831                                              | 7.62E-03 | 8.9263                                              | 7.24E-03 | 9.0892                                              | 7.22E-03 | 14.637                                              |
| 8.49E-03 | 3.051                                               | 8.24E-03 | 9.5107                                              | 8.24E-03 | 10.1189                                             | 8.50E-03 | 16.164                                              |
| 9.29E-03 | 3.2609                                              | 9.35E-03 | 10.5337                                             | 9.11E-03 | 10.9741                                             | 9.16E-03 | 16.9081                                             |
| 1.18E-02 | 3.9268                                              | 1.09E-02 | 11.5063                                             | 1.01E-02 | 11.4315                                             | 1.06E-02 | 17.7563                                             |
| 1.96E-02 | 6.049                                               | 2.05E-02 | 19.0228                                             | 2.00E-02 | 19.6837                                             | 2.03E-02 | 26.3666                                             |
| 2.93E-02 | 8.5553                                              | 3.06E-02 | 25.8887                                             | 3.05E-02 | 27.0426                                             | 2.97E-02 | 33.049                                              |
| 3.94E-02 | 11.0952                                             | 4.11E-02 | 32.3642                                             | 4.00E-02 | 32.8789                                             | 4.00E-02 | 39.5051                                             |
| 4.87E-02 | 13.4683                                             | 4.94E-02 | 37.1214                                             | 5.01E-02 | 38.5556                                             | 5.04E-02 | 45.4145                                             |
| 5.92E-02 | 15.9383                                             | 6.10E-02 | 43.2506                                             | 5.87E-02 | 43.061                                              | 6.07E-02 | 50.6488                                             |
| 6.95E-02 | 18.1563                                             | 7.00E-02 | 47.5989                                             | 7.02E-02 | 48.736                                              | 7.09E-02 | 55.5457                                             |
| 8.02E-02 | 20.339                                              | 7.97E-02 | 52.106                                              | 8.11E-02 | 53.7                                                | 7.93E-02 | 59.3538                                             |
| 9.00E-02 | 22.4207                                             | 8.99E-02 | 56.5636                                             | 8.83E-02 | 56.8487                                             | 9.08E-02 | 64.2187                                             |
| 1.07E-01 | 26.1536                                             | 1.02E-01 | 61.3236                                             | 9.48E-02 | 59.5658                                             | 1.01E-01 | 68.2592                                             |
| 1.49E-01 | 34.9584                                             | 1.50E-01 | 78.4766                                             | 1.51E-01 | 80.2933                                             | 1.54E-01 | 86.774                                              |
| 1.98E-01 | 44.2659                                             | 2.01E-01 | 93.6876                                             | 1.93E-01 | 93.1083                                             | 1.99E-01 | 99.7663                                             |
| 2.49E-01 | 53.4523                                             | 2.39E-01 | 103.2198                                            | 2.43E-01 | 106.2896                                            | 2.51E-01 | 111.8743                                            |
| 2.99E-01 | 62.3282                                             | 3.02E-01 | 117.3054                                            | 2.94E-01 | 118.3518                                            | 2.99E-01 | 122.9232                                            |
| 3.49E-01 | 70.7093                                             | 3.42E-01 | 125.0696                                            | 3.53E-01 | 130.3067                                            | 3.38E-01 | 130.2407                                            |
| 4.00E-01 | 78.5927                                             | 3.90E-01 | 133.5771                                            | 3.91E-01 | 137.4731                                            | 4.02E-01 | 141.0151                                            |
| 4.51E-01 | 85.9241                                             | 4.40E-01 | 141.6493                                            | 4.39E-01 | 145.4772                                            | 4.42E-01 | 146.9895                                            |
| 5.00E-01 | 93.1732                                             | 4.92E-01 | 149.1323                                            | 4.89E-01 | 153.3036                                            | 4.90E-01 | 153.6314                                            |
| 5.51E-01 | 100.19                                              | 5.43E-01 | 155.9906                                            | 5.41E-01 | 160.6471                                            | 5.38E-01 | 160.4221                                            |
| 6.02E-01 | 106.8064                                            | 6.08E-01 | 163.791                                             | 5.92E-01 | 167.4223                                            | 5.92E-01 | 166.3384                                            |
| 6.50E-01 | 113.7275                                            | 6.49E-01 | 168.395                                             | 6.53E-01 | 174.7782                                            | 6.43E-01 | 171.8012                                            |
| 7.02E-01 | 120.1645                                            | 7.08E-01 | 174.6223                                            | 6.84E-01 | 178.2663                                            | 7.05E-01 | 178.6128                                            |
| 7.52E-01 | 126.2461                                            | 7.50E-01 | 178.7272                                            | 7.53E-01 | 185.6176                                            | 7.60E-01 | 183.1709                                            |
| 8.02E-01 | 132.2011                                            | 8.09E-01 | 184.1095                                            | 7.80E-01 | 189.2653                                            | 8.00E-01 | 186.3965                                            |
| 8.53E-01 | 137.8811                                            | 8.52E-01 | 187.767                                             | 8.54E-01 | 196.2746                                            | 8.59E-01 | 191.086                                             |
| 9.02E-01 | 143.2611                                            | 9.10E-01 | 192.55                                              | 8.88E-01 | 199.286                                             | 9.01E-01 | 194.2907                                            |
| 9.53E-01 | 148.7732                                            | 9.52E-01 | 195.807                                             | 9.31E-01 | 202.9969                                            | 9.59E-01 | 198.4581                                            |
| 9.99E-01 | 153.5734                                            | 9.97E-01 | 199.1019                                            | 9.76E-01 | 206.6715                                            | 9.97E-01 | 201.0709                                            |

**Table S9.** H<sub>2</sub> adsorption data of SNU-174', SNU-175' and SNU-176' at 77 K.

| SNU-174' |                                                     | SNU-175' |                                                     | SNU-176' |                                                     |
|----------|-----------------------------------------------------|----------|-----------------------------------------------------|----------|-----------------------------------------------------|
| P (atm)  | V <sub>ads</sub> (cm <sup>3</sup> g <sup>-1</sup> ) | P (atm)  | V <sub>ads</sub> (cm <sup>3</sup> g <sup>-1</sup> ) | P (atm)  | V <sub>ads</sub> (cm <sup>3</sup> g <sup>-1</sup> ) |
| 1.30E-04 | 0.0421                                              | 1.31E-04 | 0.1974                                              | 9.51E-05 | 0.1179                                              |
| 2.18E-04 | 0.0867                                              | 2.10E-04 | 0.2142                                              | 3.26E-04 | 0.5183                                              |
| 3.19E-04 | 0.1363                                              | 3.14E-04 | 0.2288                                              | 3.26E-04 | 0.5182                                              |
| 4.16E-04 | 0.1843                                              | 4.16E-04 | 0.2393                                              | 3.94E-04 | 0.63                                                |
| 5.15E-04 | 0.2355                                              | 5.17E-04 | 0.2457                                              | 9.08E-04 | 1.438                                               |
| 6.17E-04 | 0.2842                                              | 6.18E-04 | 0.247                                               | 8.65E-04 | 1.3755                                              |
| 7.15E-04 | 0.3348                                              | 7.46E-04 | 0.2436                                              | 8.45E-04 | 1.3438                                              |
| 8.16E-04 | 0.3842                                              | 7.96E-04 | 0.2383                                              | 8.42E-04 | 1.3386                                              |
| 9.16E-04 | 0.4343                                              | 9.58E-04 | 0.228                                               | 9.03E-04 | 1.4331                                              |
| 1.02E-03 | 0.4829                                              | 1.09E-03 | 0.1687                                              | 1.41E-03 | 2.1816                                              |
| 2.14E-03 | 1.0182                                              | 2.11E-03 | 0.1883                                              | 2.41E-03 | 3.5852                                              |
| 3.12E-03 | 1.461                                               | 3.26E-03 | 0.1357                                              | 3.40E-03 | 4.8883                                              |
| 4.18E-03 | 1.9261                                              | 4.22E-03 | 0.142                                               | 4.41E-03 | 6.1501                                              |
| 5.02E-03 | 2.2465                                              | 5.31E-03 | 0.1306                                              | 5.45E-03 | 7.3824                                              |
| 6.09E-03 | 2.67                                                | 6.37E-03 | 0.0908                                              | 6.51E-03 | 8.5818                                              |
| 7.04E-03 | 3.134                                               | 7.49E-03 | 0.0993                                              | 7.56E-03 | 9.7192                                              |
| 8.46E-03 | 3.6112                                              | 8.42E-03 | 0.0836                                              | 8.43E-03 | 10.6446                                             |
| 9.39E-03 | 3.9046                                              | 9.47E-03 | 0.0805                                              | 9.22E-03 | 11.4586                                             |
| 1.18E-02 | 4.4066                                              | 1.05E-02 | 0.0883                                              | 1.03E-02 | 12.6947                                             |
| 2.17E-02 | 6.8831                                              | 2.32E-02 | 0.1371                                              | 1.91E-02 | 20.7144                                             |
| 2.98E-02 | 8.6066                                              | 3.28E-02 | 0.206                                               | 3.03E-02 | 29.4123                                             |
| 3.96E-02 | 10.6685                                             | 4.29E-02 | 0.2617                                              | 3.79E-02 | 34.7287                                             |
| 5.00E-02 | 12.6809                                             | 5.29E-02 | 0.3091                                              | 4.72E-02 | 40.7817                                             |
| 5.98E-02 | 14.5411                                             | 6.30E-02 | 0.3509                                              | 5.71E-02 | 46.6816                                             |
| 6.98E-02 | 16.3417                                             | 7.29E-02 | 0.4126                                              | 6.77E-02 | 52.2654                                             |
| 8.02E-02 | 17.9957                                             | 8.29E-02 | 0.4693                                              | 7.82E-02 | 57.3726                                             |
| 9.00E-02 | 19.629                                              | 9.30E-02 | 0.5261                                              | 8.88E-02 | 62.1989                                             |
| 1.08E-01 | 22.2935                                             | 1.12E-01 | 0.6137                                              | 9.98E-02 | 67.2129                                             |
| 1.52E-01 | 28.1542                                             | 1.61E-01 | 1.0647                                              | 1.54E-01 | 89.1253                                             |
| 2.02E-01 | 33.9605                                             | 2.11E-01 | 1.3964                                              | 1.99E-01 | 104.2623                                            |
| 2.52E-01 | 39.5436                                             | 2.61E-01 | 1.7632                                              | 2.49E-01 | 118.9634                                            |
| 3.03E-01 | 44.4536                                             | 3.11E-01 | 2.1509                                              | 3.01E-01 | 132.4956                                            |
| 3.54E-01 | 49.2959                                             | 3.61E-01 | 2.4238                                              | 3.38E-01 | 141.0687                                            |
| 4.04E-01 | 53.6789                                             | 4.12E-01 | 2.8063                                              | 4.01E-01 | 154.2343                                            |
| 4.55E-01 | 57.5845                                             | 4.61E-01 | 3.1472                                              | 4.41E-01 | 161.6686                                            |
| 5.04E-01 | 61.7313                                             | 5.12E-01 | 3.5273                                              | 4.87E-01 | 170.0914                                            |
| 5.56E-01 | 64.9202                                             | 5.61E-01 | 3.9422                                              | 5.38E-01 | 178.4057                                            |
| 6.05E-01 | 68.6247                                             | 6.11E-01 | 4.2331                                              | 5.89E-01 | 186.2029                                            |
| 6.56E-01 | 71.6793                                             | 6.61E-01 | 4.6168                                              | 6.40E-01 | 193.5071                                            |
| 7.06E-01 | 74.7325                                             | 7.11E-01 | 4.9977                                              | 6.90E-01 | 200.8486                                            |
| 7.56E-01 | 77.9456                                             | 7.58E-01 | 6.3337                                              | 7.42E-01 | 207.3829                                            |
| 8.07E-01 | 80.3785                                             | 8.11E-01 | 6.8438                                              | 7.93E-01 | 213.5757                                            |
| 8.57E-01 | 83.4354                                             | 8.61E-01 | 7.1981                                              | 8.57E-01 | 220.8386                                            |
| 9.07E-01 | 85.6855                                             | 9.11E-01 | 7.6281                                              | 9.09E-01 | 226.2257                                            |
| 9.57E-01 | 88.3446                                             | 9.61E-01 | 8.0472                                              | 9.59E-01 | 231.1429                                            |
| 9.99E-01 | 90.7094                                             | 9.99E-01 | 8.3126                                              | 9.96E-01 | 234.8043                                            |

**Table S10.** H<sub>2</sub> adsorption data of SNU-170', SNU-171', SNU-172' and SNU-173' at 87 K.

| SNU-170' |                                                     | SNU-171' |                                                     | SNU-172' |                                                     | SNU-173' |                                                     |
|----------|-----------------------------------------------------|----------|-----------------------------------------------------|----------|-----------------------------------------------------|----------|-----------------------------------------------------|
| P (atm)  | V <sub>ads</sub> (cm <sup>3</sup> g <sup>-1</sup> ) | P (atm)  | V <sub>ads</sub> (cm <sup>3</sup> g <sup>-1</sup> ) | P (atm)  | V <sub>ads</sub> (cm <sup>3</sup> g <sup>-1</sup> ) | P (atm)  | V <sub>ads</sub> (cm <sup>3</sup> g <sup>-1</sup> ) |
| 1.12E-04 | 0.0067                                              | 1.18E-04 | 0.0367                                              | 9.64E-05 | 0.0286                                              | 9.88E-05 | 0.0631                                              |
| 1.97E-04 | 0.0181                                              | 2.12E-04 | 0.0796                                              | 2.08E-04 | 0.0776                                              | 2.09E-04 | 0.1694                                              |
| 3.42E-04 | 0.0386                                              | 3.12E-04 | 0.1239                                              | 3.11E-04 | 0.1216                                              | 2.94E-04 | 0.248                                               |
| 4.03E-04 | 0.0468                                              | 4.11E-04 | 0.1674                                              | 4.09E-04 | 0.1637                                              | 4.09E-04 | 0.3531                                              |
| 5.40E-04 | 0.0663                                              | 5.12E-04 | 0.2107                                              | 5.10E-04 | 0.2062                                              | 4.94E-04 | 0.4286                                              |
| 6.03E-04 | 0.0747                                              | 6.13E-04 | 0.2536                                              | 6.11E-04 | 0.2482                                              | 6.12E-04 | 0.5335                                              |
| 7.41E-04 | 0.0944                                              | 7.13E-04 | 0.2957                                              | 7.10E-04 | 0.29                                                | 6.95E-04 | 0.6069                                              |
| 8.03E-04 | 0.1026                                              | 8.14E-04 | 0.338                                               | 8.11E-04 | 0.3317                                              | 8.14E-04 | 0.7093                                              |
| 9.41E-04 | 0.1222                                              | 9.14E-04 | 0.3793                                              | 9.12E-04 | 0.373                                               | 8.97E-04 | 0.7808                                              |
| 1.00E-03 | 0.1304                                              | 1.01E-03 | 0.4203                                              | 1.01E-03 | 0.4146                                              | 1.02E-03 | 0.8811                                              |
| 2.14E-03 | 0.3013                                              | 2.14E-03 | 0.8891                                              | 2.54E-03 | 1.0494                                              | 2.65E-03 | 2.215                                               |
| 3.09E-03 | 0.4418                                              | 3.11E-03 | 1.2827                                              | 3.56E-03 | 1.4577                                              | 3.64E-03 | 2.9602                                              |
| 4.06E-03 | 0.583                                               | 4.13E-03 | 1.6808                                              | 4.54E-03 | 1.849                                               | 4.64E-03 | 3.6739                                              |
| 5.04E-03 | 0.7254                                              | 5.04E-03 | 2.0255                                              | 5.52E-03 | 2.2284                                              | 5.65E-03 | 4.354                                               |
| 6.09E-03 | 0.8754                                              | 6.07E-03 | 2.41                                                | 6.49E-03 | 2.6008                                              | 6.68E-03 | 5.0227                                              |
| 7.10E-03 | 1.0195                                              | 7.02E-03 | 2.6977                                              | 7.54E-03 | 2.9944                                              | 7.79E-03 | 5.7052                                              |
| 8.47E-03 | 1.2119                                              | 8.29E-03 | 3.1508                                              | 8.11E-03 | 3.209                                               | 8.47E-03 | 6.114                                               |
| 9.22E-03 | 1.3191                                              | 9.51E-03 | 3.5876                                              | 9.28E-03 | 3.6377                                              | 9.27E-03 | 6.586                                               |
| 1.24E-02 | 1.6297                                              | 1.18E-02 | 4.1311                                              | 1.07E-02 | 4.0128                                              | 1.10E-02 | 7.2519                                              |
| 2.05E-02 | 2.7028                                              | 2.14E-02 | 7.1845                                              | 1.94E-02 | 7.0239                                              | 1.94E-02 | 11.3003                                             |
| 3.03E-02 | 3.9579                                              | 3.16E-02 | 10.2426                                             | 3.04E-02 | 10.4952                                             | 2.93E-02 | 15.2426                                             |
| 4.01E-02 | 5.1796                                              | 4.16E-02 | 13.0744                                             | 3.98E-02 | 13.2484                                             | 4.00E-02 | 18.8976                                             |
| 5.01E-02 | 6.405                                               | 5.15E-02 | 15.7869                                             | 4.99E-02 | 16.0868                                             | 5.03E-02 | 22.1251                                             |
| 6.02E-02 | 7.6105                                              | 6.19E-02 | 18.4421                                             | 5.99E-02 | 18.7655                                             | 6.07E-02 | 25.1046                                             |
| 6.99E-02 | 8.7498                                              | 6.92E-02 | 20.2825                                             | 7.01E-02 | 21.3462                                             | 7.05E-02 | 27.7721                                             |
| 8.02E-02 | 9.9284                                              | 8.13E-02 | 23.2019                                             | 8.02E-02 | 23.8376                                             | 8.10E-02 | 30.4167                                             |
| 9.05E-02 | 11.098                                              | 8.91E-02 | 25.0197                                             | 9.03E-02 | 26.2146                                             | 9.07E-02 | 32.8138                                             |
| 1.07E-01 | 12.966                                              | 1.05E-01 | 28.4445                                             | 9.93E-02 | 28.2315                                             | 1.04E-01 | 35.7844                                             |
| 1.50E-01 | 17.4633                                             | 1.44E-01 | 36.4554                                             | 1.50E-01 | 38.7144                                             | 1.54E-01 | 46.0712                                             |
| 1.99E-01 | 22.3724                                             | 1.92E-01 | 45.2497                                             | 1.93E-01 | 46.5503                                             | 1.91E-01 | 52.9098                                             |
| 2.49E-01 | 27.0684                                             | 2.42E-01 | 53.662                                              | 2.42E-01 | 54.7135                                             | 2.54E-01 | 63.0516                                             |
| 3.00E-01 | 31.6129                                             | 2.93E-01 | 61.4105                                             | 2.93E-01 | 62.5352                                             | 2.94E-01 | 68.9134                                             |
| 3.50E-01 | 35.9328                                             | 3.44E-01 | 68.5602                                             | 3.44E-01 | 69.729                                              | 3.41E-01 | 75.3973                                             |
| 4.00E-01 | 40.1457                                             | 4.08E-01 | 76.7705                                             | 4.04E-01 | 77.5244                                             | 3.91E-01 | 81.7055                                             |
| 4.51E-01 | 44.0872                                             | 4.50E-01 | 81.7456                                             | 4.49E-01 | 82.9067                                             | 4.42E-01 | 87.6309                                             |
| 5.01E-01 | 47.9835                                             | 5.08E-01 | 88.3786                                             | 5.05E-01 | 89.4689                                             | 4.94E-01 | 93.2326                                             |
| 5.51E-01 | 51.7059                                             | 5.50E-01 | 92.8222                                             | 5.37E-01 | 92.8404                                             | 5.44E-01 | 98.5228                                             |
| 6.01E-01 | 55.3179                                             | 5.99E-01 | 97.6952                                             | 6.05E-01 | 99.9311                                             | 6.08E-01 | 104.6894                                            |
| 6.52E-01 | 58.7815                                             | 6.48E-01 | 102.7656                                            | 6.37E-01 | 103.0715                                            | 6.49E-01 | 108.2728                                            |
| 7.02E-01 | 62.2966                                             | 6.99E-01 | 107.4519                                            | 7.04E-01 | 109.5477                                            | 7.08E-01 | 113.6362                                            |
| 7.52E-01 | 65.5898                                             | 7.50E-01 | 111.8791                                            | 7.39E-01 | 112.5653                                            | 7.51E-01 | 116.8465                                            |
| 8.02E-01 | 68.8575                                             | 8.00E-01 | 116.1503                                            | 7.99E-01 | 117.7041                                            | 7.99E-01 | 120.6581                                            |
| 8.53E-01 | 71.99                                               | 8.51E-01 | 120.1206                                            | 8.37E-01 | 120.7912                                            | 8.48E-01 | 124.4221                                            |
| 9.03E-01 | 75.0863                                             | 9.01E-01 | 123.9945                                            | 8.83E-01 | 124.4311                                            | 9.09E-01 | 128.7791                                            |
| 9.53E-01 | 78.0825                                             | 9.51E-01 | 127.6074                                            | 9.49E-01 | 129.4176                                            | 9.52E-01 | 131.6314                                            |
| 9.98E-01 | 80.7644                                             | 9.98E-01 | 130.9964                                            | 9.85E-01 | 132.056                                             | 9.96E-01 | 134.636                                             |

**Table S11.** H<sub>2</sub> adsorption data of SNU-174', SNU-175' and SNU-176' at 87 K.

| SNU-174' |                                                     | SNU-175' |                                                     | SNU-176' |                                                     |
|----------|-----------------------------------------------------|----------|-----------------------------------------------------|----------|-----------------------------------------------------|
| P (atm)  | V <sub>ads</sub> (cm <sup>3</sup> g <sup>-1</sup> ) | P (atm)  | V <sub>ads</sub> (cm <sup>3</sup> g <sup>-1</sup> ) | P (atm)  | V <sub>ads</sub> (cm <sup>3</sup> g <sup>-1</sup> ) |
| 1.22E-04 | 0.0011                                              | 3.28E-02 | 0.0551                                              | 1.17E-04 | 0.0356                                              |
| 2.15E-04 | 0.0107                                              | 4.35E-02 | 0.141                                               | 2.11E-04 | 0.0765                                              |
| 3.04E-04 | 0.021                                               | 5.30E-02 | 0.2159                                              | 3.11E-04 | 0.119                                               |
| 4.06E-04 | 0.033                                               | 6.31E-02 | 0.3156                                              | 4.11E-04 | 0.1609                                              |
| 5.07E-04 | 0.0451                                              | 7.30E-02 | 0.4311                                              | 5.11E-04 | 0.2025                                              |
| 6.06E-04 | 0.0572                                              | 8.30E-02 | 0.5436                                              | 6.11E-04 | 0.2439                                              |
| 7.07E-04 | 0.069                                               | 9.31E-02 | 0.6561                                              | 7.12E-04 | 0.2849                                              |
| 8.06E-04 | 0.0805                                              | 1.12E-01 | 0.8053                                              | 8.12E-04 | 0.3256                                              |
| 9.07E-04 | 0.0924                                              | 1.62E-01 | 1.1541                                              | 9.13E-04 | 0.366                                               |
| 1.01E-03 | 0.1045                                              | 2.12E-01 | 1.6371                                              | 1.01E-03 | 0.4065                                              |
| 2.20E-03 | 0.2779                                              | 2.62E-01 | 1.985                                               | 2.12E-03 | 0.8594                                              |
| 3.17E-03 | 0.4239                                              | 3.11E-01 | 2.4645                                              | 3.07E-03 | 1.2383                                              |
| 4.12E-03 | 0.5668                                              | 3.62E-01 | 2.8655                                              | 4.05E-03 | 1.6223                                              |
| 5.12E-03 | 0.7193                                              | 4.11E-01 | 3.3241                                              | 5.05E-03 | 2.0046                                              |
| 6.13E-03 | 0.8713                                              | 4.62E-01 | 3.6333                                              | 6.03E-03 | 2.3744                                              |
| 7.09E-03 | 1.0306                                              | 5.11E-01 | 4.1415                                              | 7.04E-03 | 2.7433                                              |
| 8.60E-03 | 1.2415                                              | 5.62E-01 | 4.4024                                              | 8.18E-03 | 3.1613                                              |
| 9.81E-03 | 1.5965                                              | 6.11E-01 | 4.7943                                              | 9.27E-03 | 3.5477                                              |
| 1.19E-02 | 1.9682                                              | 6.61E-01 | 5.1138                                              | 1.17E-02 | 4.1985                                              |
| 2.05E-02 | 2.955                                               | 7.12E-01 | 5.4883                                              | 2.11E-02 | 7.2865                                              |
| 3.05E-02 | 4.0793                                              | 7.61E-01 | 5.72                                                | 3.11E-02 | 10.3484                                             |
| 4.08E-02 | 5.2333                                              | 8.11E-01 | 6.1002                                              | 4.14E-02 | 13.2672                                             |
| 5.07E-02 | 6.345                                               | 8.62E-01 | 6.434                                               | 5.15E-02 | 16.0294                                             |
| 6.10E-02 | 7.4136                                              | 9.12E-01 | 6.715                                               | 6.13E-02 | 18.6109                                             |
| 7.06E-02 | 8.4137                                              | 9.61E-01 | 7.1873                                              | 6.89E-02 | 20.5083                                             |
| 8.09E-02 | 9.3938                                              | 9.99E-01 | 7.724                                               | 8.12E-02 | 23.556                                              |
| 9.05E-02 | 10.355                                              |          |                                                     | 8.88E-02 | 25.375                                              |
| 1.09E-01 | 11.836                                              |          |                                                     | 1.04E-01 | 28.9041                                             |
| 1.56E-01 | 15.3844                                             |          |                                                     | 1.43E-01 | 37.0089                                             |
| 2.05E-01 | 19.0698                                             |          |                                                     | 2.05E-01 | 48.9237                                             |
| 2.56E-01 | 22.4339                                             |          |                                                     | 2.45E-01 | 55.7483                                             |
| 3.06E-01 | 25.7072                                             |          |                                                     | 2.92E-01 | 63.4679                                             |
| 3.56E-01 | 28.7802                                             |          |                                                     | 3.42E-01 | 71.0351                                             |
| 4.07E-01 | 31.7409                                             |          |                                                     | 3.93E-01 | 78.2221                                             |
| 4.57E-01 | 34.4851                                             |          |                                                     | 4.44E-01 | 85.0003                                             |
| 5.06E-01 | 37.2008                                             |          |                                                     | 4.94E-01 | 91.4756                                             |
| 5.57E-01 | 39.7685                                             |          |                                                     | 5.56E-01 | 99.2117                                             |
| 6.07E-01 | 42.3053                                             |          |                                                     | 6.08E-01 | 105.1063                                            |
| 6.57E-01 | 44.8049                                             |          |                                                     | 6.50E-01 | 109.4483                                            |
| 7.07E-01 | 47.1679                                             |          |                                                     | 7.08E-01 | 115.4219                                            |
| 7.58E-01 | 49.38                                               |          |                                                     | 7.49E-01 | 119.7514                                            |
| 8.07E-01 | 51.4176                                             |          |                                                     | 8.09E-01 | 125.3387                                            |
| 8.58E-01 | 53.4849                                             |          |                                                     | 8.51E-01 | 129.0897                                            |
| 9.08E-01 | 55.4679                                             |          |                                                     | 8.99E-01 | 133.4381                                            |
| 9.58E-01 | 57.4677                                             |          |                                                     | 9.50E-01 | 137.486                                             |
| 9.99E-01 | 59.1986                                             |          |                                                     | 9.95E-01 | 141.1641                                            |

**Table S12.** CO<sub>2</sub> adsorption data of SNU-170', SNU-171', SNU-172' and SNU-173' at 195 K.

| SNU-170' |                                                     | SNU-171' |                                                     | SNU-172' |                                                     | SNU-173' |                                                     |
|----------|-----------------------------------------------------|----------|-----------------------------------------------------|----------|-----------------------------------------------------|----------|-----------------------------------------------------|
| P (atm)  | V <sub>ads</sub> (cm <sup>3</sup> g <sup>-1</sup> ) | P (atm)  | V <sub>ads</sub> (cm <sup>3</sup> g <sup>-1</sup> ) | P (atm)  | V <sub>ads</sub> (cm <sup>3</sup> g <sup>-1</sup> ) | P (atm)  | V <sub>ads</sub> (cm <sup>3</sup> g <sup>-1</sup> ) |
| 1.09E-04 | 0.0966                                              | 5.35E-05 | 0.1376                                              | 9.87E-05 | 2.639                                               | 5.04E-05 | 0.1084                                              |
| 2.14E-04 | 0.2672                                              | 1.29E-04 | 1.5874                                              | 2.07E-04 | 5.7771                                              | 1.31E-04 | 3.2438                                              |
| 3.01E-04 | 0.3865                                              | 2.29E-04 | 3.1213                                              | 2.94E-04 | 7.551                                               | 2.26E-04 | 6.3174                                              |
| 4.03E-04 | 0.5346                                              | 3.40E-04 | 4.5838                                              | 4.33E-04 | 10.3272                                             | 3.40E-04 | 9.3148                                              |
| 5.09E-04 | 0.6774                                              | 4.59E-04 | 5.98                                                | 5.21E-04 | 11.7557                                             | 4.19E-04 | 11.2477                                             |
| 6.19E-04 | 0.8102                                              | 5.62E-04 | 7.0922                                              | 6.26E-04 | 13.2457                                             | 5.19E-04 | 13.0349                                             |
| 7.01E-04 | 0.9104                                              | 6.27E-04 | 7.733                                               | 7.24E-04 | 14.5084                                             | 6.23E-04 | 14.7038                                             |
| 8.18E-04 | 1.0484                                              | 7.77E-04 | 9.0851                                              | 7.94E-04 | 15.3662                                             | 7.20E-04 | 16.0507                                             |
| 9.01E-04 | 1.1462                                              | 8.30E-04 | 9.5557                                              | 9.26E-04 | 16.7884                                             | 8.23E-04 | 17.3935                                             |
| 9.96E-04 | 1.2558                                              | 1.01E-03 | 11.075                                              | 9.96E-04 | 17.5063                                             | 1.04E-03 | 20.0063                                             |
| 2.55E-03 | 3.3793                                              | 2.02E-03 | 18.8336                                             | 2.02E-03 | 27.2837                                             | 2.04E-03 | 29.3909                                             |
| 3.60E-03 | 4.7697                                              | 3.01E-03 | 25.4575                                             | 3.03E-03 | 34.881                                              | 3.01E-03 | 36.7846                                             |
| 4.54E-03 | 5.941                                               | 4.05E-03 | 32.0693                                             | 4.04E-03 | 41.661                                              | 4.00E-03 | 43.4552                                             |
| 5.63E-03 | 7.2807                                              | 5.09E-03 | 38.2371                                             | 5.03E-03 | 47.7567                                             | 5.01E-03 | 49.6934                                             |
| 7.05E-03 | 8.9342                                              | 7.05E-03 | 50.1071                                             | 7.18E-03 | 60.0451                                             | 6.96E-03 | 60.8855                                             |
| 7.06E-03 | 8.9358                                              | 7.05E-03 | 50.1188                                             | 7.18E-03 | 60.0525                                             | 7.75E-03 | 65.1982                                             |
| 8.78E-03 | 10.9201                                             | 8.51E-03 | 58.5696                                             | 8.52E-03 | 67.1471                                             | 8.41E-03 | 68.6209                                             |
| 9.57E-03 | 11.9384                                             | 9.32E-03 | 63.4974                                             | 9.28E-03 | 70.8465                                             | 9.22E-03 | 73.0048                                             |
| 1.06E-02 | 13.0259                                             | 9.64E-03 | 64.7975                                             | 9.45E-03 | 71.6436                                             | 9.56E-03 | 74.1501                                             |
| 1.68E-02 | 20.0866                                             | 1.61E-02 | 102.1505                                            | 1.56E-02 | 104.032                                             | 1.67E-02 | 109.211                                             |
| 2.69E-02 | 31.5316                                             | 2.48E-02 | 158.2312                                            | 2.48E-02 | 150.4451                                            | 2.54E-02 | 149.2465                                            |
| 3.69E-02 | 42.007                                              | 3.36E-02 | 216.3456                                            | 3.34E-02 | 192.9762                                            | 3.54E-02 | 193.5174                                            |
| 4.73E-02 | 51.5364                                             | 4.37E-02 | 259.5252                                            | 4.28E-02 | 236.1025                                            | 4.62E-02 | 235.7814                                            |
| 5.80E-02 | 60.055                                              | 5.44E-02 | 277.9187                                            | 5.09E-02 | 262.6475                                            | 5.58E-02 | 254.1372                                            |
| 6.67E-02 | 66.4066                                             | 6.51E-02 | 289.2369                                            | 6.28E-02 | 283.3377                                            | 6.45E-02 | 263.2849                                            |
| 7.64E-02 | 72.8182                                             | 7.58E-02 | 296.6217                                            | 7.36E-02 | 293.4246                                            | 7.64E-02 | 272.0744                                            |
| 8.61E-02 | 78.9923                                             | 8.56E-02 | 301.3622                                            | 8.99E-02 | 303.1516                                            | 8.40E-02 | 276.4105                                            |
| 1.02E-01 | 88.85                                               | 1.03E-01 | 307.9976                                            | 9.97E-02 | 307.2664                                            | 9.89E-02 | 283.25                                              |
| 1.27E-01 | 103.4266                                            | 1.31E-01 | 316.5215                                            | 1.30E-01 | 317.027                                             | 1.47E-01 | 297.6465                                            |
| 1.76E-01 | 131.2584                                            | 1.75E-01 | 326.1241                                            | 1.80E-01 | 326.6746                                            | 1.82E-01 | 304.2697                                            |
| 2.21E-01 | 161.9625                                            | 2.31E-01 | 334.3113                                            | 2.22E-01 | 332.3664                                            | 2.29E-01 | 311.3058                                            |
| 2.60E-01 | 210.9641                                            | 3.02E-01 | 341.8795                                            | 2.74E-01 | 337.5688                                            | 2.82E-01 | 317.4581                                            |
| 2.72E-01 | 256.9864                                            | 3.46E-01 | 345.8055                                            | 3.30E-01 | 341.8566                                            | 3.49E-01 | 323.6116                                            |
| 2.95E-01 | 305.9159                                            | 3.98E-01 | 349.3886                                            | 4.00E-01 | 346.0033                                            | 4.03E-01 | 327.6116                                            |
| 4.12E-01 | 322.6046                                            | 4.49E-01 | 352.6927                                            | 4.58E-01 | 348.7656                                            | 4.48E-01 | 330.4686                                            |
| 5.03E-01 | 330.5682                                            | 5.01E-01 | 355.6614                                            | 4.99E-01 | 350.4984                                            | 4.97E-01 | 333.5093                                            |
| 5.50E-01 | 334.2886                                            | 5.52E-01 | 358.0977                                            | 5.47E-01 | 352.3729                                            | 5.48E-01 | 336.2                                               |
| 6.01E-01 | 337.7682                                            | 6.03E-01 | 360.4809                                            | 5.98E-01 | 354.109                                             | 6.00E-01 | 338.5895                                            |
| 6.51E-01 | 341.5295                                            | 6.55E-01 | 362.3346                                            | 6.50E-01 | 355.6483                                            | 6.50E-01 | 340.8442                                            |
| 7.00E-01 | 345.0318                                            | 7.03E-01 | 364.4235                                            | 7.01E-01 | 357.0508                                            | 7.00E-01 | 343.0407                                            |
| 7.52E-01 | 348.0136                                            | 7.56E-01 | 366.1832                                            | 7.53E-01 | 358.209                                             | 7.52E-01 | 344.9814                                            |
| 8.00E-01 | 351.3705                                            | 8.04E-01 | 367.9672                                            | 8.02E-01 | 359.4115                                            | 8.02E-01 | 346.8372                                            |
| 8.54E-01 | 354.0136                                            | 8.54E-01 | 369.9712                                            | 8.53E-01 | 360.468                                             | 8.52E-01 | 348.5814                                            |
| 9.04E-01 | 356.3591                                            | 9.07E-01 | 371.3107                                            | 9.04E-01 | 361.4631                                            | 9.03E-01 | 350.3163                                            |
| 9.53E-01 | 358.8341                                            | 9.56E-01 | 372.6077                                            | 9.55E-01 | 362.377                                             | 9.54E-01 | 351.7663                                            |
| 9.99E-01 | 361.0182                                            | 9.99E-01 | 373.7788                                            | 9.99E-01 | 363.1877                                            | 9.99E-01 | 353.1581                                            |



**Table S13.** CO<sub>2</sub> adsorption data of SNU-174', SNU-175' and SNU-176' at 195 K.

| SNU-174' |                                                     | SNU-175' |                                                     | SNU-176' |                                                     |
|----------|-----------------------------------------------------|----------|-----------------------------------------------------|----------|-----------------------------------------------------|
| P (atm)  | V <sub>ads</sub> (cm <sup>3</sup> g <sup>-1</sup> ) | P (atm)  | V <sub>ads</sub> (cm <sup>3</sup> g <sup>-1</sup> ) | P (atm)  | V <sub>ads</sub> (cm <sup>3</sup> g <sup>-1</sup> ) |
| 9.37E-05 | 0.038                                               | 1.65E-04 | 1.6686                                              | 9.29E-05 | 0.9734                                              |
| 2.06E-04 | 0.0543                                              | 2.43E-04 | 2.2238                                              | 2.30E-04 | 3.0867                                              |
| 3.07E-04 | 0.0697                                              | 3.74E-04 | 2.7713                                              | 3.10E-04 | 4.0352                                              |
| 3.95E-04 | 0.0862                                              | 4.88E-04 | 3.3093                                              | 3.97E-04 | 5.1515                                              |
| 5.04E-04 | 0.1278                                              | 6.09E-04 | 3.747                                               | 5.00E-04 | 6.3711                                              |
| 6.00E-04 | 2.521                                               | 5.94E-04 | 3.7719                                              | 5.95E-04 | 7.4774                                              |
| 7.02E-04 | 3.3357                                              | 8.11E-04 | 4.3716                                              | 7.70E-04 | 9.2923                                              |
| 7.98E-04 | 3.667                                               | 8.07E-04 | 4.3766                                              | 8.54E-04 | 10.1346                                             |
| 9.12E-04 | 3.9843                                              | 1.05E-03 | 4.9628                                              | 9.45E-04 | 11.0301                                             |
| 1.01E-03 | 4.2521                                              | 1.02E-03 | 4.9696                                              | 1.04E-03 | 11.9496                                             |
| 2.01E-03 | 6.242                                               | 2.04E-03 | 6.9382                                              | 2.00E-03 | 20.1169                                             |
| 3.06E-03 | 7.9269                                              | 3.08E-03 | 8.3343                                              | 3.01E-03 | 27.6854                                             |
| 4.01E-03 | 9.2233                                              | 4.12E-03 | 9.4077                                              | 4.00E-03 | 34.6406                                             |
| 5.07E-03 | 10.5634                                             | 5.14E-03 | 10.5133                                             | 5.00E-03 | 41.1376                                             |
| 6.13E-03 | 11.7852                                             | 6.87E-03 | 11.7364                                             | 7.14E-03 | 54.1904                                             |
| 7.04E-03 | 12.7295                                             | 7.92E-03 | 12.8425                                             | 7.13E-03 | 54.1791                                             |
| 8.07E-03 | 13.7416                                             | 8.50E-03 | 13.1572                                             | 8.53E-03 | 62.3959                                             |
| 9.13E-03 | 14.7563                                             | 9.20E-03 | 13.516                                              | 9.29E-03 | 66.8683                                             |
| 1.02E-02 | 15.7506                                             | 1.02E-02 | 14.0427                                             | 9.58E-03 | 68.0363                                             |
| 1.95E-02 | 22.3883                                             | 1.72E-02 | 16.8665                                             | 1.57E-02 | 103.9124                                            |
| 2.92E-02 | 29.1346                                             | 2.70E-02 | 19.6867                                             | 2.37E-02 | 152.4814                                            |
| 4.12E-02 | 37.1775                                             | 4.02E-02 | 22.5121                                             | 3.25E-02 | 209.7729                                            |
| 4.97E-02 | 42.174                                              | 4.67E-02 | 23.6865                                             | 3.63E-02 | 234.6643                                            |
| 5.97E-02 | 47.4575                                             | 5.58E-02 | 25.0718                                             | 4.94E-02 | 293.5714                                            |
| 6.98E-02 | 52.4258                                             | 6.56E-02 | 26.4807                                             | 5.94E-02 | 314.6414                                            |
| 7.99E-02 | 57.1556                                             | 7.57E-02 | 27.8126                                             | 7.52E-02 | 330.7443                                            |
| 9.00E-02 | 61.6372                                             | 8.62E-02 | 29.0892                                             | 8.28E-02 | 335.86                                              |
| 1.00E-01 | 66.0761                                             | 1.02E-01 | 30.9328                                             | 9.77E-02 | 343.7186                                            |
| 1.46E-01 | 86.0611                                             | 1.51E-01 | 36.1634                                             | 1.23E-01 | 353.6257                                            |
| 1.99E-01 | 121.7174                                            | 2.01E-01 | 40.9484                                             | 1.67E-01 | 364.5343                                            |
| 2.49E-01 | 182.7333                                            | 2.54E-01 | 45.1724                                             | 2.24E-01 | 373.7257                                            |
| 3.00E-01 | 191.1525                                            | 3.01E-01 | 47.0582                                             | 2.97E-01 | 382.1257                                            |
| 3.55E-01 | 198.4166                                            | 3.52E-01 | 48.7141                                             | 3.53E-01 | 386.9785                                            |
| 3.97E-01 | 202.9689                                            | 4.03E-01 | 50.1744                                             | 3.98E-01 | 390.1814                                            |
| 4.46E-01 | 207.7055                                            | 4.54E-01 | 51.4212                                             | 4.49E-01 | 393.1929                                            |
| 4.97E-01 | 212.1452                                            | 5.05E-01 | 52.5306                                             | 4.99E-01 | 396.0457                                            |
| 5.48E-01 | 216.2863                                            | 5.56E-01 | 53.5383                                             | 5.51E-01 | 398.4785                                            |
| 5.99E-01 | 220.0593                                            | 6.07E-01 | 54.461                                              | 6.02E-01 | 400.6943                                            |
| 6.50E-01 | 223.4888                                            | 6.58E-01 | 55.2171                                             | 6.53E-01 | 402.67                                              |
| 7.01E-01 | 226.6646                                            | 7.09E-01 | 55.796                                              | 7.04E-01 | 404.4914                                            |
| 7.51E-01 | 229.7035                                            | 7.61E-01 | 56.1969                                             | 7.54E-01 | 406.0714                                            |
| 8.01E-01 | 232.82                                              | 8.11E-01 | 56.5175                                             | 8.05E-01 | 407.6671                                            |
| 8.51E-01 | 235.8875                                            | 8.51E-01 | 59.516                                              | 8.55E-01 | 409.0657                                            |
| 9.02E-01 | 238.5951                                            | 9.04E-01 | 60.5128                                             | 9.06E-01 | 410.3557                                            |
| 9.53E-01 | 241.1656                                            | 9.57E-01 | 61.2228                                             | 9.56E-01 | 411.5385                                            |
| 9.99E-01 | 243.5215                                            | 9.99E-01 | 61.9569                                             | 9.99E-01 | 412.6571                                            |

**Table S14.** CO<sub>2</sub> adsorption data of SNU-170', SNU-171', SNU-172' and SNU-173' at 273 K.

| SNU-170' |                                                     | SNU-171' |                                                     | SNU-172' |                                                     | SNU-173' |                                                     |
|----------|-----------------------------------------------------|----------|-----------------------------------------------------|----------|-----------------------------------------------------|----------|-----------------------------------------------------|
| P (atm)  | V <sub>ads</sub> (cm <sup>3</sup> g <sup>-1</sup> ) | P (atm)  | V <sub>ads</sub> (cm <sup>3</sup> g <sup>-1</sup> ) | P (atm)  | V <sub>ads</sub> (cm <sup>3</sup> g <sup>-1</sup> ) | P (atm)  | V <sub>ads</sub> (cm <sup>3</sup> g <sup>-1</sup> ) |
| 3.00E-03 | 0.0298                                              | 1.21E-04 | 0.0021                                              | 9.77E-05 | 0.004                                               | 1.37E-04 | 0.0311                                              |
| 4.34E-03 | 0.0801                                              | 2.07E-04 | 0.0096                                              | 2.28E-04 | 0.0148                                              | 2.15E-04 | 0.0423                                              |
| 5.02E-03 | 0.1045                                              | 3.04E-04 | 0.0177                                              | 3.30E-04 | 0.0228                                              | 3.10E-04 | 0.0565                                              |
| 6.31E-03 | 0.1531                                              | 4.06E-04 | 0.0267                                              | 4.26E-04 | 0.0308                                              | 4.09E-04 | 0.0712                                              |
| 7.00E-03 | 0.1781                                              | 5.04E-04 | 0.0354                                              | 5.25E-04 | 0.0393                                              | 5.08E-04 | 0.0857                                              |
| 9.14E-03 | 0.2658                                              | 6.05E-04 | 0.0442                                              | 6.24E-04 | 0.0481                                              | 6.11E-04 | 0.101                                               |
| 9.98E-03 | 0.2998                                              | 7.05E-04 | 0.0532                                              | 7.24E-04 | 0.0572                                              | 7.14E-04 | 0.1161                                              |
| 1.40E-02 | 0.0399                                              | 8.06E-04 | 0.0614                                              | 8.21E-04 | 0.0662                                              | 8.03E-04 | 0.1291                                              |
| 2.34E-02 | 0.3733                                              | 9.06E-04 | 0.0696                                              | 9.21E-04 | 0.0756                                              | 9.36E-04 | 0.1489                                              |
| 3.36E-02 | 0.751                                               | 1.01E-03 | 0.079                                               | 1.02E-03 | 0.0852                                              | 1.09E-03 | 0.1369                                              |
| 4.35E-02 | 1.1404                                              | 2.21E-03 | 0.2295                                              | 2.14E-03 | 0.2315                                              | 2.02E-03 | 0.2856                                              |
| 5.36E-02 | 1.5589                                              | 3.19E-03 | 0.3513                                              | 3.15E-03 | 0.3626                                              | 3.06E-03 | 0.4501                                              |
| 6.32E-02 | 1.9559                                              | 4.19E-03 | 0.4728                                              | 4.17E-03 | 0.4948                                              | 4.12E-03 | 0.6151                                              |
| 7.34E-02 | 2.3575                                              | 5.24E-03 | 0.6015                                              | 5.15E-03 | 0.6225                                              | 5.17E-03 | 0.7795                                              |
| 8.39E-02 | 2.7864                                              | 6.25E-03 | 0.7258                                              | 6.19E-03 | 0.7577                                              | 6.24E-03 | 0.9458                                              |
| 9.34E-02 | 3.1826                                              | 7.20E-03 | 0.8407                                              | 7.18E-03 | 0.8864                                              | 7.05E-03 | 1.0701                                              |
| 1.12E-01 | 3.9391                                              | 9.02E-03 | 1.0654                                              | 8.42E-03 | 1.0476                                              | 8.02E-03 | 1.222                                               |
| 1.60E-01 | 5.8242                                              | 9.74E-03 | 1.1515                                              | 9.22E-03 | 1.1516                                              | 9.05E-03 | 1.3821                                              |
| 2.10E-01 | 7.8305                                              | 1.32E-02 | 1.3145                                              | 1.13E-02 | 1.4155                                              | 1.01E-02 | 1.5454                                              |
| 2.60E-01 | 9.7821                                              | 2.12E-02 | 2.2626                                              | 2.04E-02 | 2.5837                                              | 2.16E-02 | 3.2901                                              |
| 3.10E-01 | 11.7554                                             | 3.07E-02 | 3.3446                                              | 3.02E-02 | 3.816                                               | 3.17E-02 | 4.8195                                              |
| 3.60E-01 | 13.7082                                             | 4.08E-02 | 4.5522                                              | 4.01E-02 | 5.0603                                              | 3.94E-02 | 5.937                                               |
| 4.10E-01 | 15.7523                                             | 5.07E-02 | 5.6907                                              | 5.01E-02 | 6.2969                                              | 5.47E-02 | 8.1063                                              |
| 4.60E-01 | 17.7304                                             | 6.07E-02 | 6.7939                                              | 6.00E-02 | 7.5123                                              | 6.04E-02 | 8.901                                               |
| 5.10E-01 | 19.7118                                             | 7.07E-02 | 7.9402                                              | 6.99E-02 | 8.7101                                              | 7.17E-02 | 10.4536                                             |
| 5.60E-01 | 21.6042                                             | 8.07E-02 | 9.0657                                              | 7.99E-02 | 9.9024                                              | 7.95E-02 | 11.4933                                             |
| 6.09E-01 | 23.5443                                             | 9.06E-02 | 10.1665                                             | 8.99E-02 | 11.0788                                             | 9.16E-02 | 13.0905                                             |
| 6.60E-01 | 25.5805                                             | 1.08E-01 | 12.0596                                             | 1.02E-01 | 12.4445                                             | 1.06E-01 | 14.8871                                             |
| 7.09E-01 | 27.4723                                             | 1.50E-01 | 16.5733                                             | 1.49E-01 | 17.6566                                             | 1.56E-01 | 21.0676                                             |
| 7.60E-01 | 29.3341                                             | 1.99E-01 | 21.581                                              | 2.05E-01 | 23.6545                                             | 2.07E-01 | 26.8299                                             |
| 8.09E-01 | 31.4175                                             | 2.59E-01 | 27.6537                                             | 2.48E-01 | 28.103                                              | 2.57E-01 | 32.4209                                             |
| 8.59E-01 | 33.3793                                             | 3.00E-01 | 31.7737                                             | 3.04E-01 | 33.6468                                             | 3.06E-01 | 37.9983                                             |
| 9.09E-01 | 35.2107                                             | 3.58E-01 | 37.4563                                             | 3.49E-01 | 37.8994                                             | 3.57E-01 | 43.2533                                             |
| 9.59E-01 | 37.0993                                             | 4.00E-01 | 41.5262                                             | 4.04E-01 | 43.0959                                             | 4.07E-01 | 48.1799                                             |
| 9.99E-01 | 38.9248                                             | 4.58E-01 | 47.1447                                             | 4.36E-01 | 45.9774                                             | 4.57E-01 | 52.9349                                             |
|          |                                                     | 4.99E-01 | 51.1185                                             | 5.03E-01 | 52.0119                                             | 5.07E-01 | 57.539                                              |
|          |                                                     | 5.58E-01 | 56.6044                                             | 5.35E-01 | 54.8845                                             | 5.57E-01 | 62.0187                                             |
|          |                                                     | 5.99E-01 | 60.4425                                             | 6.03E-01 | 60.7544                                             | 5.98E-01 | 65.5543                                             |
|          |                                                     | 6.57E-01 | 65.6778                                             | 6.35E-01 | 63.5088                                             | 6.56E-01 | 70.588                                              |
|          |                                                     | 6.99E-01 | 69.5241                                             | 7.01E-01 | 68.9933                                             | 6.97E-01 | 74.026                                              |
|          |                                                     | 7.57E-01 | 74.753                                              | 7.35E-01 | 71.7663                                             | 7.57E-01 | 78.8616                                             |
|          |                                                     | 7.98E-01 | 78.5323                                             | 8.01E-01 | 77.1202                                             | 7.98E-01 | 82.1886                                             |
|          |                                                     | 8.57E-01 | 83.6421                                             | 8.35E-01 | 79.7995                                             | 8.57E-01 | 86.8057                                             |
|          |                                                     | 9.07E-01 | 88.0749                                             | 8.77E-01 | 83.156                                              | 8.98E-01 | 90.0088                                             |
|          |                                                     | 9.49E-01 | 91.6258                                             | 9.50E-01 | 88.6819                                             | 9.57E-01 | 94.4428                                             |
|          |                                                     | 9.93E-01 | 95.4681                                             | 9.81E-01 | 91.1098                                             | 9.95E-01 | 97.2726                                             |

**Table S15.** CO<sub>2</sub> adsorption data of SNU-174', SNU-175' and SNU-176' at 273 K.

| SNU-174' |                                                     | SNU-175' |                                                     | SNU-176' |                                                     |
|----------|-----------------------------------------------------|----------|-----------------------------------------------------|----------|-----------------------------------------------------|
| P (atm)  | V <sub>ads</sub> (cm <sup>3</sup> g <sup>-1</sup> ) | P (atm)  | V <sub>ads</sub> (cm <sup>3</sup> g <sup>-1</sup> ) | P (atm)  | V <sub>ads</sub> (cm <sup>3</sup> g <sup>-1</sup> ) |
| 1.21E-04 | 0.0007                                              | 3.11E-04 | 0.001                                               | 1.11E-04 | 0.0051                                              |
| 2.25E-04 | 0.0011                                              | 4.12E-04 | 0.0045                                              | 2.10E-04 | 0.0119                                              |
| 3.23E-04 | 0.0019                                              | 5.13E-04 | 0.0076                                              | 3.06E-04 | 0.0199                                              |
| 4.22E-04 | 0.0037                                              | 6.12E-04 | 0.0109                                              | 4.05E-04 | 0.0283                                              |
| 5.22E-04 | 0.0053                                              | 7.14E-04 | 0.0135                                              | 5.04E-04 | 0.037                                               |
| 6.21E-04 | 0.0074                                              | 8.16E-04 | 0.016                                               | 6.04E-04 | 0.0459                                              |
| 7.21E-04 | 0.0091                                              | 9.15E-04 | 0.0183                                              | 7.04E-04 | 0.055                                               |
| 8.22E-04 | 0.011                                               | 1.02E-03 | 0.0205                                              | 8.03E-04 | 0.064                                               |
| 9.22E-04 | 0.0128                                              | 2.26E-03 | 0.078                                               | 9.04E-04 | 0.0731                                              |
| 1.02E-03 | 0.0143                                              | 3.22E-03 | 0.1211                                              | 1.00E-03 | 0.0822                                              |
| 2.34E-03 | 0.0828                                              | 4.21E-03 | 0.1644                                              | 2.20E-03 | 0.233                                               |
| 3.02E-03 | 0.1166                                              | 5.23E-03 | 0.208                                               | 3.18E-03 | 0.3568                                              |
| 4.03E-03 | 0.169                                               | 6.19E-03 | 0.2478                                              | 4.21E-03 | 0.4869                                              |
| 5.04E-03 | 0.2212                                              | 7.21E-03 | 0.2896                                              | 5.20E-03 | 0.6123                                              |
| 6.05E-03 | 0.2728                                              | 9.05E-03 | 0.3643                                              | 6.25E-03 | 0.745                                               |
| 7.36E-03 | 0.339                                               | 9.87E-03 | 0.3959                                              | 7.17E-03 | 0.8611                                              |
| 9.38E-03 | 0.4413                                              | 1.22E-02 | 0.5049                                              | 8.97E-03 | 1.0899                                              |
| 9.99E-03 | 0.4698                                              | 2.15E-02 | 0.8502                                              | 9.72E-03 | 1.1848                                              |
| 1.29E-02 | 0.595                                               | 3.11E-02 | 1.1764                                              | 1.26E-02 | 1.4421                                              |
| 2.21E-02 | 0.9695                                              | 4.13E-02 | 1.4897                                              | 2.05E-02 | 2.4385                                              |
| 3.20E-02 | 1.3897                                              | 5.14E-02 | 1.7681                                              | 3.00E-02 | 3.6196                                              |
| 4.21E-02 | 1.8136                                              | 6.17E-02 | 1.9963                                              | 4.00E-02 | 4.8583                                              |
| 5.22E-02 | 2.2134                                              | 7.20E-02 | 2.2371                                              | 5.00E-02 | 6.0759                                              |
| 6.24E-02 | 2.6277                                              | 8.20E-02 | 2.4557                                              | 6.00E-02 | 7.3001                                              |
| 7.20E-02 | 2.997                                               | 9.21E-02 | 2.6637                                              | 7.00E-02 | 8.5058                                              |
| 8.23E-02 | 3.3943                                              | 1.10E-01 | 3.0889                                              | 8.00E-02 | 9.7031                                              |
| 9.22E-02 | 3.7808                                              | 1.57E-01 | 4.021                                               | 8.99E-02 | 10.8887                                             |
| 1.11E-01 | 4.4704                                              | 2.09E-01 | 4.6637                                              | 1.07E-01 | 12.8482                                             |
| 1.59E-01 | 6.0386                                              | 2.59E-01 | 5.4192                                              | 1.49E-01 | 17.5751                                             |
| 2.09E-01 | 7.7417                                              | 3.09E-01 | 6.135                                               | 2.08E-01 | 24.1421                                             |
| 2.59E-01 | 9.2604                                              | 3.59E-01 | 6.7465                                              | 2.49E-01 | 28.5427                                             |
| 3.09E-01 | 10.8071                                             | 4.09E-01 | 7.337                                               | 3.07E-01 | 34.81                                               |
| 3.60E-01 | 12.23                                               | 4.59E-01 | 7.9002                                              | 3.58E-01 | 40.0637                                             |
| 4.08E-01 | 13.71                                               | 5.10E-01 | 8.4638                                              | 4.08E-01 | 45.2301                                             |
| 4.59E-01 | 15.1594                                             | 5.60E-01 | 8.9463                                              | 4.57E-01 | 50.226                                              |
| 5.09E-01 | 16.5475                                             | 6.10E-01 | 9.4747                                              | 5.07E-01 | 55.2261                                             |
| 5.58E-01 | 17.9072                                             | 6.60E-01 | 9.9228                                              | 5.57E-01 | 60.155                                              |
| 6.08E-01 | 19.2573                                             | 7.10E-01 | 10.338                                              | 6.07E-01 | 65.0307                                             |
| 6.59E-01 | 20.5566                                             | 7.60E-01 | 10.7134                                             | 6.57E-01 | 69.8499                                             |
| 7.09E-01 | 21.8628                                             | 8.09E-01 | 11.1731                                             | 7.06E-01 | 74.6584                                             |
| 7.59E-01 | 23.1135                                             | 8.60E-01 | 11.5837                                             | 7.56E-01 | 79.3431                                             |
| 8.09E-01 | 24.4264                                             | 9.10E-01 | 11.9354                                             | 8.06E-01 | 84.0881                                             |
| 8.59E-01 | 25.5988                                             | 9.60E-01 | 12.279                                              | 8.56E-01 | 88.6701                                             |
| 9.09E-01 | 26.8857                                             | 9.99E-01 | 12.6347                                             | 9.06E-01 | 93.3059                                             |
| 9.59E-01 | 27.8859                                             |          |                                                     | 9.56E-01 | 97.7823                                             |
| 9.99E-01 | 29.1517                                             |          |                                                     | 9.93E-01 | 101.1333                                            |

**Table S16.** CO<sub>2</sub> adsorption data of SNU-170', SNU-171', SNU-172' and SNU-173' at 298 K.

| SNU-170' |                                                     | SNU-171' |                                                     | SNU-172' |                                                     | SNU-173' |                                                     |
|----------|-----------------------------------------------------|----------|-----------------------------------------------------|----------|-----------------------------------------------------|----------|-----------------------------------------------------|
| P (atm)  | V <sub>ads</sub> (cm <sup>3</sup> g <sup>-1</sup> ) | P (atm)  | V <sub>ads</sub> (cm <sup>3</sup> g <sup>-1</sup> ) | P (atm)  | V <sub>ads</sub> (cm <sup>3</sup> g <sup>-1</sup> ) | P (atm)  | V <sub>ads</sub> (cm <sup>3</sup> g <sup>-1</sup> ) |
| 1.02E-03 | 0.0028                                              | 2.33E-03 | 0.0576                                              | 1.16E-04 | 0.0019                                              | 1.29E-04 | 0.0107                                              |
| 2.01E-03 | 0.0177                                              | 3.00E-03 | 0.0887                                              | 2.16E-04 | 0.0034                                              | 2.30E-04 | 0.0143                                              |
| 3.03E-03 | 0.0317                                              | 4.34E-03 | 0.1549                                              | 3.08E-04 | 0.0061                                              | 3.27E-04 | 0.0177                                              |
| 4.01E-03 | 0.0464                                              | 5.02E-03 | 0.1856                                              | 4.05E-04 | 0.0092                                              | 4.30E-04 | 0.0213                                              |
| 5.00E-03 | 0.0617                                              | 6.04E-03 | 0.2355                                              | 5.03E-04 | 0.0125                                              | 5.21E-04 | 0.0255                                              |
| 6.00E-03 | 0.0771                                              | 7.37E-03 | 0.3004                                              | 6.02E-04 | 0.016                                               | 6.12E-04 | 0.0312                                              |
| 7.05E-03 | 0.0922                                              | 9.36E-03 | 0.4005                                              | 7.01E-04 | 0.0197                                              | 7.15E-04 | 0.0409                                              |
| 9.03E-03 | 0.1304                                              | 1.02E-02 | 0.4415                                              | 8.01E-04 | 0.0234                                              | 8.07E-04 | 0.0513                                              |
| 9.79E-03 | 0.1416                                              | 1.31E-02 | 0.5405                                              | 9.01E-04 | 0.0271                                              | 9.04E-04 | 0.0603                                              |
| 1.29E-02 | 0.1561                                              | 2.20E-02 | 0.9719                                              | 1.00E-03 | 0.0308                                              | 1.02E-03 | 0.0691                                              |
| 2.23E-02 | 0.2792                                              | 3.18E-02 | 1.4693                                              | 2.16E-03 | 0.0931                                              | 2.11E-03 | 0.1347                                              |
| 3.27E-02 | 0.464                                               | 4.18E-02 | 1.9796                                              | 3.17E-03 | 0.1483                                              | 3.04E-03 | 0.1901                                              |
| 4.28E-02 | 0.6008                                              | 5.20E-02 | 2.4905                                              | 4.19E-03 | 0.2037                                              | 4.08E-03 | 0.2531                                              |
| 5.24E-02 | 0.7979                                              | 6.18E-02 | 2.9776                                              | 5.18E-03 | 0.2551                                              | 5.13E-03 | 0.3175                                              |
| 6.29E-02 | 1.076                                               | 7.19E-02 | 3.4809                                              | 6.16E-03 | 0.3056                                              | 6.18E-03 | 0.3833                                              |
| 7.27E-02 | 1.294                                               | 8.16E-02 | 4.0073                                              | 7.20E-03 | 0.3597                                              | 7.24E-03 | 0.4479                                              |
| 8.26E-02 | 1.5138                                              | 9.18E-02 | 4.5374                                              | 8.89E-03 | 0.4497                                              | 8.29E-03 | 0.5131                                              |
| 9.26E-02 | 1.7251                                              | 1.10E-01 | 5.4062                                              | 9.76E-03 | 0.4966                                              | 9.35E-03 | 0.5789                                              |
| 1.03E-01 | 1.9296                                              | 1.57E-01 | 7.5946                                              | 1.24E-02 | 0.6024                                              | 1.04E-02 | 0.6444                                              |
| 1.52E-01 | 2.8933                                              | 2.06E-01 | 9.9531                                              | 2.01E-02 | 1.0129                                              | 2.08E-02 | 1.2435                                              |
| 2.01E-01 | 3.9464                                              | 2.56E-01 | 12.2852                                             | 2.97E-02 | 1.5252                                              | 3.08E-02 | 1.8905                                              |
| 2.52E-01 | 5.0192                                              | 3.06E-01 | 14.6191                                             | 3.95E-02 | 2.0579                                              | 4.08E-02 | 2.5274                                              |
| 3.01E-01 | 6.128                                               | 3.56E-01 | 16.8407                                             | 4.95E-02 | 2.6027                                              | 5.83E-02 | 3.6111                                              |
| 3.51E-01 | 7.2033                                              | 4.06E-01 | 19.0922                                             | 5.95E-02 | 3.1509                                              | 6.22E-02 | 3.8652                                              |
| 4.01E-01 | 8.3131                                              | 4.56E-01 | 21.3369                                             | 6.95E-02 | 3.6955                                              | 7.11E-02 | 4.4244                                              |
| 4.51E-01 | 9.4578                                              | 5.05E-01 | 23.6147                                             | 7.95E-02 | 4.2344                                              | 8.10E-02 | 5.024                                               |
| 5.01E-01 | 10.545                                              | 5.56E-01 | 25.7667                                             | 8.94E-02 | 4.7692                                              | 9.10E-02 | 5.63                                                |
| 5.51E-01 | 11.4727                                             | 6.05E-01 | 27.9205                                             | 1.06E-01 | 5.6279                                              | 1.09E-01 | 6.6604                                              |
| 6.01E-01 | 12.497                                              | 6.55E-01 | 30.0901                                             | 1.48E-01 | 7.6995                                              | 1.53E-01 | 9.251                                               |
| 6.51E-01 | 13.6372                                             | 7.05E-01 | 32.3158                                             | 1.94E-01 | 10.0798                                             | 2.02E-01 | 12.0514                                             |
| 7.01E-01 | 14.6694                                             | 7.55E-01 | 34.4798                                             | 2.44E-01 | 12.5267                                             | 2.52E-01 | 14.901                                              |
| 7.51E-01 | 15.7048                                             | 8.05E-01 | 36.6022                                             | 2.93E-01 | 14.9777                                             | 3.01E-01 | 17.9312                                             |
| 8.01E-01 | 16.8139                                             | 8.55E-01 | 38.6981                                             | 3.43E-01 | 17.4001                                             | 3.51E-01 | 20.8837                                             |
| 8.51E-01 | 17.894                                              | 9.05E-01 | 40.7151                                             | 3.92E-01 | 19.8013                                             | 4.02E-01 | 23.594                                              |
| 9.00E-01 | 19.0217                                             | 9.55E-01 | 42.6749                                             | 4.43E-01 | 22.149                                              | 4.52E-01 | 26.1551                                             |
| 9.51E-01 | 19.968                                              | 9.99E-01 | 44.6162                                             | 5.07E-01 | 24.9292                                             | 5.02E-01 | 28.679                                              |
| 9.96E-01 | 20.8096                                             |          |                                                     | 5.56E-01 | 27.1907                                             | 5.53E-01 | 31.1297                                             |
|          |                                                     |          |                                                     | 6.06E-01 | 29.5232                                             | 6.03E-01 | 33.556                                              |
|          |                                                     |          |                                                     | 6.56E-01 | 31.8168                                             | 6.53E-01 | 35.9434                                             |
|          |                                                     |          |                                                     | 7.06E-01 | 34.0656                                             | 7.03E-01 | 38.2547                                             |
|          |                                                     |          |                                                     | 7.58E-01 | 36.1585                                             | 7.53E-01 | 40.5521                                             |
|          |                                                     |          |                                                     | 8.05E-01 | 38.3929                                             | 8.03E-01 | 42.8241                                             |
|          |                                                     |          |                                                     | 8.56E-01 | 40.5768                                             | 8.53E-01 | 45.0733                                             |
|          |                                                     |          |                                                     | 9.08E-01 | 42.6193                                             | 9.03E-01 | 47.2743                                             |
|          |                                                     |          |                                                     | 9.56E-01 | 44.648                                              | 9.53E-01 | 49.4449                                             |
|          |                                                     |          |                                                     | 9.99E-01 | 46.5286                                             | 9.99E-01 | 51.4269                                             |

**Table S17.** CO<sub>2</sub> adsorption data of SNU-174', SNU-175' and SNU-176' at 298 K.

| SNU-174' |                                                     | SNU-175' |                                                     | SNU-176' |                                                     |
|----------|-----------------------------------------------------|----------|-----------------------------------------------------|----------|-----------------------------------------------------|
| P (atm)  | V <sub>ads</sub> (cm <sup>3</sup> g <sup>-1</sup> ) | P (atm)  | V <sub>ads</sub> (cm <sup>3</sup> g <sup>-1</sup> ) | P (atm)  | V <sub>ads</sub> (cm <sup>3</sup> g <sup>-1</sup> ) |
| 5.11E-03 | 0.0086                                              | 5.32E-03 | 0.0017                                              | 7.21E-04 | 0.0016                                              |
| 6.13E-03 | 0.0255                                              | 6.38E-03 | 0.0107                                              | 8.21E-04 | 0.0033                                              |
| 7.07E-03 | 0.0406                                              | 7.44E-03 | 0.0198                                              | 9.20E-04 | 0.0051                                              |
| 9.38E-03 | 0.0816                                              | 8.49E-03 | 0.0293                                              | 1.02E-03 | 0.007                                               |
| 1.02E-02 | 0.0957                                              | 9.54E-03 | 0.0389                                              | 2.31E-03 | 0.0717                                              |
| 1.35E-02 | 0.0549                                              | 1.06E-02 | 0.048                                               | 3.01E-03 | 0.1062                                              |
| 2.27E-02 | 0.1625                                              | 2.27E-02 | 0.1632                                              | 4.35E-03 | 0.1752                                              |
| 3.25E-02 | 0.3755                                              | 3.28E-02 | 0.2924                                              | 5.01E-03 | 0.2087                                              |
| 4.30E-02 | 0.6162                                              | 4.26E-02 | 0.4086                                              | 6.00E-03 | 0.2601                                              |
| 5.26E-02 | 0.8448                                              | 5.28E-02 | 0.5271                                              | 7.34E-03 | 0.3294                                              |
| 6.28E-02 | 0.99                                                | 6.28E-02 | 0.6477                                              | 9.26E-03 | 0.4312                                              |
| 7.28E-02 | 1.1963                                              | 7.27E-02 | 0.765                                               | 1.01E-02 | 0.4752                                              |
| 8.30E-02 | 1.3909                                              | 8.27E-02 | 0.8903                                              | 1.35E-02 | 0.5056                                              |
| 9.28E-02 | 1.5438                                              | 9.27E-02 | 1.0208                                              | 2.20E-02 | 0.9459                                              |
| 1.12E-01 | 1.8536                                              | 1.12E-01 | 1.2199                                              | 3.22E-02 | 1.4791                                              |
| 1.61E-01 | 2.5616                                              | 1.61E-01 | 1.7127                                              | 4.21E-02 | 2.0048                                              |
| 2.10E-01 | 3.3647                                              | 2.11E-01 | 2.2445                                              | 5.21E-02 | 2.535                                               |
| 2.61E-01 | 4.05                                                | 2.60E-01 | 3.1095                                              | 6.22E-02 | 3.0675                                              |
| 3.10E-01 | 4.7398                                              | 3.09E-01 | 4.3808                                              | 7.22E-02 | 3.6019                                              |
| 3.61E-01 | 5.5537                                              | 3.61E-01 | 5.2328                                              | 8.22E-02 | 4.1331                                              |
| 4.10E-01 | 6.1584                                              | 4.11E-01 | 5.81                                                | 9.22E-02 | 4.6672                                              |
| 4.61E-01 | 6.9578                                              | 4.61E-01 | 6.3108                                              | 1.10E-01 | 5.5977                                              |
| 5.10E-01 | 7.614                                               | 5.11E-01 | 6.7296                                              | 1.56E-01 | 7.9272                                              |
| 5.61E-01 | 8.4004                                              | 5.61E-01 | 7.157                                               | 2.06E-01 | 10.4368                                             |
| 6.10E-01 | 9.0046                                              | 6.11E-01 | 7.5382                                              | 2.56E-01 | 12.8987                                             |
| 6.62E-01 | 9.8251                                              | 6.61E-01 | 7.9331                                              | 3.06E-01 | 15.3777                                             |
| 7.09E-01 | 10.3263                                             | 7.11E-01 | 8.3336                                              | 3.55E-01 | 17.7684                                             |
| 7.62E-01 | 11.1128                                             | 7.61E-01 | 8.6557                                              | 4.05E-01 | 20.1999                                             |
| 8.10E-01 | 11.5992                                             | 8.11E-01 | 9.0427                                              | 4.55E-01 | 22.5569                                             |
| 8.62E-01 | 12.3123                                             | 8.62E-01 | 9.3019                                              | 5.05E-01 | 24.9521                                             |
| 9.09E-01 | 12.7777                                             | 9.11E-01 | 9.6254                                              | 5.55E-01 | 27.2931                                             |
| 9.61E-01 | 13.6608                                             | 9.61E-01 | 10.0099                                             | 6.05E-01 | 29.6474                                             |
| 9.99E-01 | 14.0967                                             | 9.99E-01 | 10.2924                                             | 6.55E-01 | 31.925                                              |
|          |                                                     |          |                                                     | 7.05E-01 | 34.265                                              |
|          |                                                     |          |                                                     | 7.55E-01 | 36.5264                                             |
|          |                                                     |          |                                                     | 8.05E-01 | 38.8426                                             |
|          |                                                     |          |                                                     | 8.55E-01 | 41.0917                                             |
|          |                                                     |          |                                                     | 9.04E-01 | 43.3739                                             |
|          |                                                     |          |                                                     | 9.55E-01 | 45.6917                                             |
|          |                                                     |          |                                                     | 9.99E-01 | 47.9284                                             |

**Table S18.** CH<sub>4</sub> adsorption data of SNU-170', SNU-171', SNU-172' and SNU-173' at 195 K.

| SNU-170' |                                                     | SNU-171' |                                                     | SNU-172' |                                                     | SNU-173' |                                                     |
|----------|-----------------------------------------------------|----------|-----------------------------------------------------|----------|-----------------------------------------------------|----------|-----------------------------------------------------|
| P (atm)  | V <sub>ads</sub> (cm <sup>3</sup> g <sup>-1</sup> ) | P (atm)  | V <sub>ads</sub> (cm <sup>3</sup> g <sup>-1</sup> ) | P (atm)  | V <sub>ads</sub> (cm <sup>3</sup> g <sup>-1</sup> ) | P (atm)  | V <sub>ads</sub> (cm <sup>3</sup> g <sup>-1</sup> ) |
| 2.10E-04 | 0.0073                                              | 1.87E-04 | 0.0756                                              | 1.07E-04 | 0.0204                                              | 2.35E-04 | 0.2501                                              |
| 3.02E-04 | 0.0215                                              | 2.92E-04 | 0.1484                                              | 2.09E-04 | 0.0645                                              | 2.35E-04 | 0.2478                                              |
| 4.02E-04 | 0.0369                                              | 3.99E-04 | 0.2178                                              | 3.14E-04 | 0.1049                                              | 3.00E-04 | 0.3271                                              |
| 5.07E-04 | 0.0535                                              | 5.04E-04 | 0.2848                                              | 4.08E-04 | 0.1404                                              | 7.63E-04 | 0.9623                                              |
| 5.98E-04 | 0.0678                                              | 6.08E-04 | 0.3501                                              | 5.05E-04 | 0.177                                               | 7.25E-04 | 0.9187                                              |
| 7.49E-04 | 0.0928                                              | 7.12E-04 | 0.4137                                              | 6.03E-04 | 0.216                                               | 7.15E-04 | 0.8982                                              |
| 8.12E-04 | 0.1014                                              | 8.14E-04 | 0.4763                                              | 7.05E-04 | 0.2548                                              | 7.21E-04 | 0.8993                                              |
| 9.05E-04 | 0.1135                                              | 9.16E-04 | 0.5376                                              | 8.07E-04 | 0.2926                                              | 1.16E-03 | 1.4573                                              |
| 9.99E-04 | 0.1295                                              | 1.02E-03 | 0.5984                                              | 9.08E-04 | 0.3299                                              | 1.12E-03 | 1.4141                                              |
| 2.11E-03 | 0.3345                                              | 1.02E-03 | 0.5998                                              | 1.01E-03 | 0.3673                                              | 1.11E-03 | 1.3944                                              |
| 3.07E-03 | 0.5091                                              | 2.12E-03 | 1.2587                                              | 2.02E-03 | 0.7703                                              | 2.23E-03 | 2.7496                                              |
| 4.10E-03 | 0.684                                               | 3.10E-03 | 1.8298                                              | 3.03E-03 | 1.1701                                              | 3.34E-03 | 3.989                                               |
| 5.09E-03 | 0.8529                                              | 4.16E-03 | 2.4258                                              | 4.03E-03 | 1.556                                               | 4.43E-03 | 5.1052                                              |
| 6.08E-03 | 1.0007                                              | 5.02E-03 | 2.8982                                              | 5.03E-03 | 1.9374                                              | 5.48E-03 | 6.1106                                              |
| 7.10E-03 | 1.1622                                              | 6.19E-03 | 3.5298                                              | 6.09E-03 | 2.336                                               | 6.56E-03 | 7.0918                                              |
| 8.78E-03 | 1.3931                                              | 7.07E-03 | 3.994                                               | 7.87E-03 | 2.995                                               | 7.71E-03 | 8.0815                                              |
| 9.59E-03 | 1.51                                                | 8.74E-03 | 4.8649                                              | 8.53E-03 | 3.2325                                              | 8.21E-03 | 8.5                                                 |
| 1.18E-02 | 1.8249                                              | 9.23E-03 | 5.1123                                              | 9.36E-03 | 3.5349                                              | 9.19E-03 | 9.2948                                              |
| 2.07E-02 | 2.7055                                              | 1.11E-02 | 6.0114                                              | 1.09E-02 | 4.0909                                              | 1.02E-02 | 10.2832                                             |
| 3.23E-02 | 3.8866                                              | 1.94E-02 | 10.1116                                             | 1.81E-02 | 6.845                                               | 1.86E-02 | 16.3065                                             |
| 4.07E-02 | 4.6434                                              | 3.08E-02 | 15.3343                                             | 2.93E-02 | 10.7939                                             | 3.00E-02 | 23.3049                                             |
| 5.04E-02 | 5.3626                                              | 3.94E-02 | 19.0177                                             | 3.77E-02 | 13.5817                                             | 3.95E-02 | 28.2314                                             |
| 6.15E-02 | 6.1645                                              | 5.05E-02 | 23.6429                                             | 4.71E-02 | 16.6638                                             | 5.08E-02 | 33.7564                                             |
| 7.10E-02 | 6.7007                                              | 5.96E-02 | 27.1289                                             | 5.72E-02 | 19.6497                                             | 5.83E-02 | 36.9708                                             |
| 8.11E-02 | 7.2165                                              | 6.96E-02 | 30.667                                              | 6.74E-02 | 22.5203                                             | 6.78E-02 | 40.7751                                             |
| 9.15E-02 | 7.6931                                              | 7.97E-02 | 34.0282                                             | 7.78E-02 | 25.3408                                             | 7.76E-02 | 44.6286                                             |
| 1.10E-01 | 8.5438                                              | 8.99E-02 | 37.4804                                             | 8.84E-02 | 27.9802                                             | 8.81E-02 | 48.5022                                             |
| 1.58E-01 | 10.6469                                             | 1.02E-01 | 41.3862                                             | 9.92E-02 | 30.6422                                             | 9.89E-02 | 52.3693                                             |
| 2.07E-01 | 12.7809                                             | 1.55E-01 | 58.6722                                             | 1.41E-01 | 41.9046                                             | 1.43E-01 | 67.215                                              |
| 2.58E-01 | 14.5743                                             | 1.99E-01 | 71.3855                                             | 1.89E-01 | 53.6654                                             | 1.93E-01 | 81.6484                                             |
| 3.08E-01 | 16.4272                                             | 2.56E-01 | 86.3214                                             | 2.39E-01 | 65.178                                              | 2.54E-01 | 96.2455                                             |
| 3.58E-01 | 18.1504                                             | 2.87E-01 | 94.1204                                             | 2.88E-01 | 75.8193                                             | 2.85E-01 | 103.0737                                            |
| 4.09E-01 | 19.6756                                             | 3.55E-01 | 109.2576                                            | 3.39E-01 | 86.1631                                             | 3.56E-01 | 115.8551                                            |
| 4.58E-01 | 21.2011                                             | 3.90E-01 | 116.1238                                            | 3.90E-01 | 95.6541                                             | 3.90E-01 | 121.3605                                            |
| 5.08E-01 | 22.798                                              | 4.35E-01 | 124.2092                                            | 4.51E-01 | 105.8713                                            | 4.37E-01 | 127.6023                                            |
| 5.58E-01 | 24.2609                                             | 4.83E-01 | 132.7052                                            | 4.83E-01 | 110.7336                                            | 4.85E-01 | 134.0581                                            |
| 6.08E-01 | 25.7473                                             | 5.34E-01 | 140.6456                                            | 5.51E-01 | 120.5689                                            | 5.36E-01 | 140.3337                                            |
| 6.58E-01 | 27.185                                              | 5.86E-01 | 148.1236                                            | 5.83E-01 | 125.0467                                            | 5.88E-01 | 145.7663                                            |
| 7.08E-01 | 28.5114                                             | 6.39E-01 | 154.9393                                            | 6.24E-01 | 130.7631                                            | 6.40E-01 | 150.9361                                            |
| 7.58E-01 | 29.8707                                             | 7.04E-01 | 162.676                                             | 6.71E-01 | 136.968                                             | 7.06E-01 | 156.4326                                            |
| 8.08E-01 | 31.2475                                             | 7.57E-01 | 168.2797                                            | 7.54E-01 | 145.7328                                            | 7.58E-01 | 160.4465                                            |
| 8.58E-01 | 32.557                                              | 8.08E-01 | 173.1402                                            | 8.02E-01 | 150.1959                                            | 8.00E-01 | 163.3139                                            |
| 9.09E-01 | 33.7239                                             | 8.58E-01 | 177.6942                                            | 8.54E-01 | 154.4262                                            | 8.58E-01 | 167.1302                                            |
| 9.59E-01 | 35.0143                                             | 9.00E-01 | 181.1832                                            | 9.03E-01 | 158.6328                                            | 9.01E-01 | 169.8                                               |
| 9.99E-01 | 36.1823                                             | 9.58E-01 | 185.7934                                            | 9.53E-01 | 162.7287                                            | 9.50E-01 | 172.357                                             |
|          |                                                     | 9.97E-01 | 188.5422                                            | 9.99E-01 | 166.1484                                            | 9.96E-01 | 175.0581                                            |

**Table S19.** CH<sub>4</sub> adsorption data of SNU-174', SNU-175' and SNU-176' at 195 K.

| SNU-174' |                                                     | SNU-175' |                                                     | SNU-176' |                                                     |
|----------|-----------------------------------------------------|----------|-----------------------------------------------------|----------|-----------------------------------------------------|
| P (atm)  | V <sub>ads</sub> (cm <sup>3</sup> g <sup>-1</sup> ) | P (atm)  | V <sub>ads</sub> (cm <sup>3</sup> g <sup>-1</sup> ) | P (atm)  | V <sub>ads</sub> (cm <sup>3</sup> g <sup>-1</sup> ) |
| 9.50E-05 | 0.0363                                              | 2.62E-01 | 0.0034                                              | 9.52E-05 | 0.0124                                              |
| 2.10E-04 | 0.0517                                              | 3.12E-01 | 0.0629                                              | 1.96E-04 | 0.0658                                              |
| 3.08E-04 | 0.0648                                              | 3.62E-01 | 0.1601                                              | 3.02E-04 | 0.1146                                              |
| 4.11E-04 | 0.0787                                              | 4.12E-01 | 0.2369                                              | 3.95E-04 | 0.156                                               |
| 5.11E-04 | 0.0924                                              | 4.62E-01 | 0.3149                                              | 4.94E-04 | 0.2001                                              |
| 6.04E-04 | 0.1051                                              | 5.12E-01 | 0.4249                                              | 6.27E-04 | 0.2582                                              |
| 7.03E-04 | 0.1188                                              | 5.62E-01 | 0.5073                                              | 7.08E-04 | 0.2927                                              |
| 8.23E-04 | 0.1355                                              | 6.12E-01 | 0.6081                                              | 7.98E-04 | 0.3313                                              |
| 9.28E-04 | 0.1501                                              | 6.61E-01 | 0.7359                                              | 8.97E-04 | 0.3735                                              |
| 1.02E-03 | 0.1612                                              | 7.11E-01 | 0.8425                                              | 9.97E-04 | 0.4163                                              |
| 2.05E-03 | 0.3094                                              | 7.62E-01 | 0.9248                                              | 2.01E-03 | 0.8897                                              |
| 3.11E-03 | 0.4642                                              | 8.11E-01 | 1.1084                                              | 3.02E-03 | 1.3455                                              |
| 4.03E-03 | 0.5896                                              | 8.61E-01 | 1.2543                                              | 4.08E-03 | 1.8186                                              |
| 5.06E-03 | 0.7289                                              | 9.12E-01 | 1.4023                                              | 5.10E-03 | 2.2629                                              |
| 6.12E-03 | 0.8677                                              | 9.61E-01 | 1.7698                                              | 6.07E-03 | 2.6814                                              |
| 7.18E-03 | 1.004                                               | 9.99E-01 | 1.9346                                              | 7.14E-03 | 3.1296                                              |
| 8.24E-03 | 1.1372                                              |          |                                                     | 8.18E-03 | 3.5685                                              |
| 9.29E-03 | 1.2672                                              |          |                                                     | 9.33E-03 | 4.0433                                              |
| 1.04E-02 | 1.3951                                              |          |                                                     | 1.12E-02 | 4.804                                               |
| 2.08E-02 | 2.4191                                              |          |                                                     | 2.00E-02 | 8.3896                                              |
| 3.09E-02 | 3.3735                                              |          |                                                     | 2.97E-02 | 12.0923                                             |
| 4.11E-02 | 4.2672                                              |          |                                                     | 3.97E-02 | 15.7319                                             |
| 5.90E-02 | 5.6673                                              |          |                                                     | 5.09E-02 | 19.7709                                             |
| 6.23E-02 | 5.9795                                              |          |                                                     | 5.71E-02 | 21.8177                                             |
| 7.16E-02 | 6.6705                                              |          |                                                     | 7.11E-02 | 26.2074                                             |
| 8.15E-02 | 7.3951                                              |          |                                                     | 7.74E-02 | 28.0401                                             |
| 9.15E-02 | 8.097                                               |          |                                                     | 8.97E-02 | 31.5453                                             |
| 1.10E-01 | 9.2856                                              |          |                                                     | 1.02E-01 | 35.1843                                             |
| 1.56E-01 | 12.1389                                             |          |                                                     | 1.49E-01 | 48.9149                                             |
| 2.06E-01 | 14.9964                                             |          |                                                     | 1.99E-01 | 62.3057                                             |
| 2.56E-01 | 17.8377                                             |          |                                                     | 2.49E-01 | 74.7583                                             |
| 3.06E-01 | 20.5434                                             |          |                                                     | 2.85E-01 | 83.132                                              |
| 3.56E-01 | 23.1614                                             |          |                                                     | 3.55E-01 | 98.3539                                             |
| 4.06E-01 | 25.7495                                             |          |                                                     | 3.90E-01 | 105.0183                                            |
| 4.56E-01 | 28.2859                                             |          |                                                     | 4.35E-01 | 113.0346                                            |
| 5.06E-01 | 30.7575                                             |          |                                                     | 4.82E-01 | 121.5954                                            |
| 5.56E-01 | 33.2086                                             |          |                                                     | 5.32E-01 | 129.7184                                            |
| 6.06E-01 | 35.6256                                             |          |                                                     | 5.82E-01 | 137.866                                             |
| 6.56E-01 | 38.0027                                             |          |                                                     | 6.33E-01 | 145.5986                                            |
| 7.06E-01 | 40.3904                                             |          |                                                     | 6.85E-01 | 152.6857                                            |
| 7.56E-01 | 42.7207                                             |          |                                                     | 7.37E-01 | 159.2057                                            |
| 8.06E-01 | 45.0207                                             |          |                                                     | 7.88E-01 | 165.42                                              |
| 8.56E-01 | 47.3115                                             |          |                                                     | 8.54E-01 | 172.5957                                            |
| 9.06E-01 | 49.6033                                             |          |                                                     | 9.07E-01 | 177.7857                                            |
| 9.56E-01 | 51.8603                                             |          |                                                     | 9.57E-01 | 182.4171                                            |
| 9.99E-01 | 53.971                                              |          |                                                     | 9.94E-01 | 185.7257                                            |

**Table S20.** CH<sub>4</sub> adsorption data of SNU-170', SNU-171', SNU-172' and SNU-173' at 273 K.

| SNU-170' |                                                     | SNU-171' |                                                     | SNU-172' |                                                     | SNU-173' |                                                     |
|----------|-----------------------------------------------------|----------|-----------------------------------------------------|----------|-----------------------------------------------------|----------|-----------------------------------------------------|
| P (atm)  | V <sub>ads</sub> (cm <sup>3</sup> g <sup>-1</sup> ) | P (atm)  | V <sub>ads</sub> (cm <sup>3</sup> g <sup>-1</sup> ) | P (atm)  | V <sub>ads</sub> (cm <sup>3</sup> g <sup>-1</sup> ) | P (atm)  | V <sub>ads</sub> (cm <sup>3</sup> g <sup>-1</sup> ) |
| 9.19E-03 | 0.0011                                              | 6.01E-03 | 0.0026                                              | 2.19E-04 | 0.0002                                              | 2.24E-02 | 0.1585                                              |
| 9.87E-03 | 0.0038                                              | 7.08E-03 | 0.0213                                              | 3.17E-04 | 0.0012                                              | 3.21E-02 | 0.4028                                              |
| 1.30E-02 | 0.0655                                              | 9.42E-03 | 0.0711                                              | 4.18E-04 | 0.0023                                              | 4.23E-02 | 0.6549                                              |
| 2.27E-02 | 0.1475                                              | 1.00E-02 | 0.079                                               | 5.18E-04 | 0.0034                                              | 6.06E-02 | 1.1015                                              |
| 3.26E-02 | 0.2045                                              | 1.31E-02 | 0.0915                                              | 6.17E-04 | 0.0044                                              | 6.28E-02 | 1.1582                                              |
| 4.26E-02 | 0.2879                                              | 2.28E-02 | 0.2924                                              | 7.17E-04 | 0.0055                                              | 7.23E-02 | 1.3835                                              |
| 5.32E-02 | 0.41                                                | 3.27E-02 | 0.4977                                              | 8.18E-04 | 0.0066                                              | 8.23E-02 | 1.6239                                              |
| 6.26E-02 | 0.4704                                              | 4.29E-02 | 0.6793                                              | 9.17E-04 | 0.0076                                              | 9.23E-02 | 1.8648                                              |
| 7.32E-02 | 0.5814                                              | 5.25E-02 | 0.8819                                              | 1.02E-03 | 0.0087                                              | 1.11E-01 | 2.3072                                              |
| 8.27E-02 | 0.6877                                              | 6.24E-02 | 1.1405                                              | 2.29E-03 | 0.0344                                              | 1.58E-01 | 3.4474                                              |
| 9.27E-02 | 0.7974                                              | 7.26E-02 | 1.3442                                              | 3.20E-03 | 0.0526                                              | 2.08E-01 | 4.6191                                              |
| 1.12E-01 | 1.0257                                              | 8.28E-02 | 1.5984                                              | 4.20E-03 | 0.0727                                              | 2.58E-01 | 5.7994                                              |
| 1.61E-01 | 1.5382                                              | 9.29E-02 | 1.8214                                              | 5.30E-03 | 0.0947                                              | 3.08E-01 | 6.9626                                              |
| 2.11E-01 | 2.0672                                              | 1.11E-01 | 2.2021                                              | 6.18E-03 | 0.1119                                              | 3.58E-01 | 8.1254                                              |
| 2.61E-01 | 2.6383                                              | 1.60E-01 | 3.2651                                              | 7.17E-03 | 0.1318                                              | 4.08E-01 | 9.2785                                              |
| 3.10E-01 | 3.2217                                              | 2.10E-01 | 4.348                                               | 9.01E-03 | 0.1697                                              | 4.58E-01 | 10.4261                                             |
| 3.61E-01 | 3.8039                                              | 2.60E-01 | 5.4209                                              | 9.77E-03 | 0.1852                                              | 5.08E-01 | 11.5615                                             |
| 4.10E-01 | 4.4507                                              | 3.10E-01 | 6.4661                                              | 1.28E-02 | 0.2285                                              | 5.58E-01 | 12.6808                                             |
| 4.61E-01 | 4.8747                                              | 3.60E-01 | 7.4989                                              | 2.17E-02 | 0.4105                                              | 6.08E-01 | 13.8021                                             |
| 5.11E-01 | 5.442                                               | 4.09E-01 | 8.5963                                              | 3.20E-02 | 0.6177                                              | 6.58E-01 | 14.9023                                             |
| 5.61E-01 | 5.8676                                              | 4.59E-01 | 9.5523                                              | 4.20E-02 | 0.8208                                              | 7.08E-01 | 15.995                                              |
| 6.11E-01 | 6.4594                                              | 5.10E-01 | 10.5785                                             | 5.14E-02 | 1.0108                                              | 7.58E-01 | 17.0865                                             |
| 6.61E-01 | 6.8965                                              | 5.60E-01 | 11.5608                                             | 6.16E-02 | 1.2161                                              | 8.08E-01 | 18.1464                                             |
| 7.10E-01 | 7.4793                                              | 6.09E-01 | 12.5576                                             | 7.19E-02 | 1.4267                                              | 8.58E-01 | 19.2086                                             |
| 7.61E-01 | 8.0721                                              | 6.59E-01 | 13.5271                                             | 8.17E-02 | 1.627                                               | 9.08E-01 | 20.2787                                             |
| 8.11E-01 | 8.5239                                              | 7.10E-01 | 14.5434                                             | 9.18E-02 | 1.8329                                              | 9.58E-01 | 21.3343                                             |
| 8.61E-01 | 8.9868                                              | 7.59E-01 | 15.5388                                             | 1.10E-01 | 2.1949                                              | 9.99E-01 | 22.2866                                             |
| 9.11E-01 | 9.555                                               | 8.09E-01 | 16.5288                                             | 1.56E-01 | 3.1308                                              |          |                                                     |
| 9.61E-01 | 10.0152                                             | 8.60E-01 | 17.4501                                             | 2.05E-01 | 4.1413                                              |          |                                                     |
| 9.99E-01 | 10.6843                                             | 9.09E-01 | 18.4093                                             | 2.55E-01 | 5.142                                               |          |                                                     |
|          |                                                     | 9.60E-01 | 19.3073                                             | 3.05E-01 | 6.1509                                              |          |                                                     |
|          |                                                     | 9.99E-01 | 20.2397                                             | 3.55E-01 | 7.1276                                              |          |                                                     |
|          |                                                     |          |                                                     | 4.05E-01 | 8.1348                                              |          |                                                     |
|          |                                                     |          |                                                     | 4.55E-01 | 9.1037                                              |          |                                                     |
|          |                                                     |          |                                                     | 5.05E-01 | 10.0901                                             |          |                                                     |
|          |                                                     |          |                                                     | 5.55E-01 | 11.0565                                             |          |                                                     |
|          |                                                     |          |                                                     | 6.05E-01 | 12.0253                                             |          |                                                     |
|          |                                                     |          |                                                     | 6.55E-01 | 12.9792                                             |          |                                                     |
|          |                                                     |          |                                                     | 7.05E-01 | 13.9394                                             |          |                                                     |
|          |                                                     |          |                                                     | 7.55E-01 | 14.8803                                             |          |                                                     |
|          |                                                     |          |                                                     | 8.05E-01 | 15.8422                                             |          |                                                     |
|          |                                                     |          |                                                     | 8.55E-01 | 16.7762                                             |          |                                                     |
|          |                                                     |          |                                                     | 9.05E-01 | 17.682                                              |          |                                                     |
|          |                                                     |          |                                                     | 9.55E-01 | 18.5909                                             |          |                                                     |
|          |                                                     |          |                                                     | 9.99E-01 | 19.4387                                             |          |                                                     |



**Table S21.** CH<sub>4</sub> adsorption data of SNU-174', SNU-175' and SNU-176' at 273 K.

| SNU-174' |                                                     | SNU-175' |                                                     | SNU-176' |                                                     |
|----------|-----------------------------------------------------|----------|-----------------------------------------------------|----------|-----------------------------------------------------|
| P (atm)  | V <sub>ads</sub> (cm <sup>3</sup> g <sup>-1</sup> ) | P (atm)  | V <sub>ads</sub> (cm <sup>3</sup> g <sup>-1</sup> ) | P (atm)  | V <sub>ads</sub> (cm <sup>3</sup> g <sup>-1</sup> ) |
| 4.30E-02 | 0.0648                                              | 3.12E-01 | 0.018                                               | 2.33E-03 | 0.0217                                              |
| 5.31E-02 | 0.1325                                              | 3.62E-01 | 0.1402                                              | 3.23E-03 | 0.0395                                              |
| 6.32E-02 | 0.2024                                              | 4.12E-01 | 0.2529                                              | 4.04E-03 | 0.0563                                              |
| 7.27E-02 | 0.2923                                              | 4.62E-01 | 0.3874                                              | 5.04E-03 | 0.0777                                              |
| 8.28E-02 | 0.3156                                              | 5.12E-01 | 0.5163                                              | 6.25E-03 | 0.1033                                              |
| 9.27E-02 | 0.4127                                              | 5.62E-01 | 0.63                                                | 7.01E-03 | 0.119                                               |
| 1.12E-01 | 0.547                                               | 6.12E-01 | 0.7691                                              | 9.08E-03 | 0.1657                                              |
| 1.61E-01 | 0.9367                                              | 6.62E-01 | 0.8953                                              | 9.87E-03 | 0.1826                                              |
| 2.11E-01 | 1.4125                                              | 7.11E-01 | 1.0672                                              | 1.29E-02 | 0.2084                                              |
| 2.61E-01 | 1.7224                                              | 7.61E-01 | 1.2608                                              | 2.24E-02 | 0.4048                                              |
| 3.11E-01 | 2.2126                                              | 8.11E-01 | 1.4728                                              | 3.25E-02 | 0.6197                                              |
| 3.61E-01 | 2.5853                                              | 8.62E-01 | 1.5747                                              | 4.27E-02 | 0.8356                                              |
| 4.11E-01 | 3.0372                                              | 9.12E-01 | 1.719                                               | 5.23E-02 | 1.041                                               |
| 4.61E-01 | 3.4497                                              | 9.61E-01 | 1.9224                                              | 6.28E-02 | 1.2661                                              |
| 5.11E-01 | 3.8493                                              | 9.99E-01 | 1.9959                                              | 7.28E-02 | 1.4823                                              |
| 5.61E-01 | 4.1905                                              |          |                                                     | 8.26E-02 | 1.6917                                              |
| 6.11E-01 | 4.6359                                              |          |                                                     | 9.26E-02 | 1.912                                               |
| 6.62E-01 | 4.9726                                              |          |                                                     | 1.11E-01 | 2.3131                                              |
| 7.10E-01 | 5.4106                                              |          |                                                     | 1.60E-01 | 3.3738                                              |
| 7.61E-01 | 5.6554                                              |          |                                                     | 2.09E-01 | 4.48                                                |
| 8.10E-01 | 6.1475                                              |          |                                                     | 2.60E-01 | 5.5552                                              |
| 8.61E-01 | 6.4504                                              |          |                                                     | 3.09E-01 | 6.6581                                              |
| 9.12E-01 | 6.8434                                              |          |                                                     | 3.60E-01 | 7.6925                                              |
| 9.61E-01 | 7.1984                                              |          |                                                     | 4.09E-01 | 8.7715                                              |
| 9.99E-01 | 7.6518                                              |          |                                                     | 4.59E-01 | 9.8133                                              |
|          |                                                     |          |                                                     | 5.09E-01 | 10.8846                                             |
|          |                                                     |          |                                                     | 5.59E-01 | 11.9118                                             |
|          |                                                     |          |                                                     | 6.09E-01 | 12.9254                                             |
|          |                                                     |          |                                                     | 6.59E-01 | 13.9155                                             |
|          |                                                     |          |                                                     | 7.10E-01 | 14.9759                                             |
|          |                                                     |          |                                                     | 7.59E-01 | 15.976                                              |
|          |                                                     |          |                                                     | 8.09E-01 | 16.9911                                             |
|          |                                                     |          |                                                     | 8.59E-01 | 17.9751                                             |
|          |                                                     |          |                                                     | 9.09E-01 | 18.9883                                             |
|          |                                                     |          |                                                     | 9.59E-01 | 19.9531                                             |
|          |                                                     |          |                                                     | 9.99E-01 | 20.9094                                             |

**Table S22.** CH<sub>4</sub> adsorption data of SNU-170', SNU-171', SNU-172' and SNU-173' at 298 K.

| SNU-170' |                                                     | SNU-171' |                                                     | SNU-172' |                                                     | SNU-173' |                                                     |
|----------|-----------------------------------------------------|----------|-----------------------------------------------------|----------|-----------------------------------------------------|----------|-----------------------------------------------------|
| P (atm)  | V <sub>ads</sub> (cm <sup>3</sup> g <sup>-1</sup> ) | P (atm)  | V <sub>ads</sub> (cm <sup>3</sup> g <sup>-1</sup> ) | P (atm)  | V <sub>ads</sub> (cm <sup>3</sup> g <sup>-1</sup> ) | P (atm)  | V <sub>ads</sub> (cm <sup>3</sup> g <sup>-1</sup> ) |
| 1.62E-01 | 0.3189                                              | 1.27E-02 | 0.1442                                              | 2.00E-03 | 0.0094                                              | 2.28E-02 | 0.0471                                              |
| 2.12E-01 | 0.7472                                              | 2.23E-02 | 0.2577                                              | 3.36E-03 | 0.0243                                              | 3.26E-02 | 0.1741                                              |
| 2.61E-01 | 1.0319                                              | 3.19E-02 | 0.3755                                              | 4.01E-03 | 0.0313                                              | 4.26E-02 | 0.3051                                              |
| 3.11E-01 | 1.4084                                              | 4.22E-02 | 0.4958                                              | 5.31E-03 | 0.0457                                              | 6.13E-02 | 0.5391                                              |
| 3.61E-01 | 1.7068                                              | 5.24E-02 | 0.6544                                              | 6.21E-03 | 0.0552                                              | 6.29E-02 | 0.5624                                              |
| 4.11E-01 | 2.1507                                              | 6.21E-02 | 0.728                                               | 7.22E-03 | 0.0661                                              | 7.27E-02 | 0.6888                                              |
| 4.61E-01 | 2.452                                               | 7.18E-02 | 0.8493                                              | 9.15E-03 | 0.0885                                              | 8.26E-02 | 0.8165                                              |
| 5.11E-01 | 2.739                                               | 8.18E-02 | 0.9864                                              | 9.89E-03 | 0.0969                                              | 9.26E-02 | 0.94                                                |
| 5.61E-01 | 3.0865                                              | 9.17E-02 | 1.0997                                              | 1.30E-02 | 0.1145                                              | 1.11E-01 | 1.1769                                              |
| 6.12E-01 | 3.3039                                              | 1.11E-01 | 1.3012                                              | 2.27E-02 | 0.2259                                              | 1.60E-01 | 1.7902                                              |
| 6.62E-01 | 3.5849                                              | 1.60E-01 | 1.8972                                              | 3.22E-02 | 0.3287                                              | 2.10E-01 | 2.4063                                              |
| 7.11E-01 | 4.1352                                              | 2.09E-01 | 2.5395                                              | 4.19E-02 | 0.441                                               | 2.60E-01 | 3.042                                               |
| 7.61E-01 | 4.3341                                              | 2.59E-01 | 3.0927                                              | 5.25E-02 | 0.563                                               | 3.10E-01 | 3.6685                                              |
| 8.11E-01 | 4.7704                                              | 3.09E-01 | 3.78                                                | 6.23E-02 | 0.6763                                              | 3.60E-01 | 4.3075                                              |
| 8.61E-01 | 4.9761                                              | 3.59E-01 | 4.3869                                              | 7.23E-02 | 0.7917                                              | 4.10E-01 | 4.9397                                              |
| 9.11E-01 | 5.4322                                              | 4.09E-01 | 5.0226                                              | 8.23E-02 | 0.9086                                              | 4.60E-01 | 5.5691                                              |
| 9.61E-01 | 5.7731                                              | 4.59E-01 | 5.5634                                              | 9.23E-02 | 1.0234                                              | 5.10E-01 | 6.2114                                              |
| 9.99E-01 | 6.1636                                              | 5.09E-01 | 6.1903                                              | 1.11E-01 | 1.2305                                              | 5.60E-01 | 6.8372                                              |
|          |                                                     | 5.59E-01 | 6.6569                                              | 1.58E-01 | 1.7712                                              | 6.10E-01 | 7.4602                                              |
|          |                                                     | 6.09E-01 | 7.352                                               | 2.08E-01 | 2.3589                                              | 6.60E-01 | 8.0752                                              |
|          |                                                     | 6.59E-01 | 7.9488                                              | 2.58E-01 | 2.9282                                              | 7.10E-01 | 8.6984                                              |
|          |                                                     | 7.09E-01 | 8.6013                                              | 3.08E-01 | 3.5044                                              | 7.60E-01 | 9.3256                                              |
|          |                                                     | 7.59E-01 | 9.0452                                              | 3.58E-01 | 4.0667                                              | 8.10E-01 | 9.917                                               |
|          |                                                     | 8.09E-01 | 9.6914                                              | 4.08E-01 | 4.6577                                              | 8.60E-01 | 10.5356                                             |
|          |                                                     | 8.59E-01 | 10.312                                              | 4.58E-01 | 5.1961                                              | 9.10E-01 | 11.1555                                             |
|          |                                                     | 9.09E-01 | 10.8992                                             | 5.08E-01 | 5.7649                                              | 9.60E-01 | 11.7526                                             |
|          |                                                     | 9.59E-01 | 11.3384                                             | 5.58E-01 | 6.3348                                              | 9.99E-01 | 12.3071                                             |
|          |                                                     | 9.99E-01 | 12.0026                                             | 6.07E-01 | 6.8907                                              |          |                                                     |
|          |                                                     |          |                                                     | 6.58E-01 | 7.4465                                              |          |                                                     |
|          |                                                     |          |                                                     | 7.08E-01 | 8.024                                               |          |                                                     |
|          |                                                     |          |                                                     | 7.58E-01 | 8.5791                                              |          |                                                     |
|          |                                                     |          |                                                     | 8.08E-01 | 9.131                                               |          |                                                     |
|          |                                                     |          |                                                     | 8.58E-01 | 9.6807                                              |          |                                                     |
|          |                                                     |          |                                                     | 9.08E-01 | 10.2327                                             |          |                                                     |
|          |                                                     |          |                                                     | 9.58E-01 | 10.7708                                             |          |                                                     |
|          |                                                     |          |                                                     | 9.99E-01 | 11.2639                                             |          |                                                     |

**Table S23.** CH<sub>4</sub> adsorption data of SNU-174', SNU-175' and SNU-176' at 298 K.

| SNU-174' |                                                     | SNU-175' |                                                     | SNU-176' |                                                     |
|----------|-----------------------------------------------------|----------|-----------------------------------------------------|----------|-----------------------------------------------------|
| P (atm)  | V <sub>ads</sub> (cm <sup>3</sup> g <sup>-1</sup> ) | P (atm)  | V <sub>ads</sub> (cm <sup>3</sup> g <sup>-1</sup> ) | P (atm)  | V <sub>ads</sub> (cm <sup>3</sup> g <sup>-1</sup> ) |
| 1.12E-01 | 0.0514                                              | Nil      | Nil                                                 | 4.31E-03 | 0.0083                                              |
| 1.61E-01 | 0.2658                                              |          |                                                     | 5.04E-03 | 0.0151                                              |
| 2.11E-01 | 0.525                                               |          |                                                     | 6.09E-03 | 0.0263                                              |
| 2.61E-01 | 0.6984                                              |          |                                                     | 7.26E-03 | 0.0377                                              |
| 3.11E-01 | 0.9429                                              |          |                                                     | 9.21E-03 | 0.0613                                              |
| 3.62E-01 | 1.1115                                              |          |                                                     | 9.91E-03 | 0.0688                                              |
| 4.12E-01 | 1.3638                                              |          |                                                     | 1.32E-02 | 0.0354                                              |
| 4.62E-01 | 1.5356                                              |          |                                                     | 2.33E-02 | 0.1454                                              |
| 5.12E-01 | 1.7467                                              |          |                                                     | 3.28E-02 | 0.2454                                              |
| 5.61E-01 | 1.9055                                              |          |                                                     | 4.27E-02 | 0.3522                                              |
| 6.11E-01 | 2.2143                                              |          |                                                     | 5.31E-02 | 0.4672                                              |
| 6.61E-01 | 2.3531                                              |          |                                                     | 6.31E-02 | 0.5765                                              |
| 7.11E-01 | 2.5944                                              |          |                                                     | 7.31E-02 | 0.6878                                              |
| 7.61E-01 | 2.6735                                              |          |                                                     | 8.30E-02 | 0.8096                                              |
| 8.11E-01 | 2.9558                                              |          |                                                     | 9.30E-02 | 0.9252                                              |
| 8.61E-01 | 3.1678                                              |          |                                                     | 1.12E-01 | 1.1372                                              |
| 9.11E-01 | 3.4642                                              |          |                                                     | 1.61E-01 | 1.7119                                              |
| 9.61E-01 | 3.5986                                              |          |                                                     | 2.11E-01 | 2.3352                                              |
| 9.99E-01 | 3.8696                                              |          |                                                     | 2.61E-01 | 2.8965                                              |
|          |                                                     |          |                                                     | 3.11E-01 | 3.5343                                              |
|          |                                                     |          |                                                     | 3.61E-01 | 4.0947                                              |
|          |                                                     |          |                                                     | 4.11E-01 | 4.6821                                              |
|          |                                                     |          |                                                     | 4.61E-01 | 5.293                                               |
|          |                                                     |          |                                                     | 5.10E-01 | 5.8703                                              |
|          |                                                     |          |                                                     | 5.61E-01 | 6.4348                                              |
|          |                                                     |          |                                                     | 6.11E-01 | 7.0155                                              |
|          |                                                     |          |                                                     | 6.61E-01 | 7.5451                                              |
|          |                                                     |          |                                                     | 7.11E-01 | 8.1547                                              |
|          |                                                     |          |                                                     | 7.61E-01 | 8.6802                                              |
|          |                                                     |          |                                                     | 8.11E-01 | 9.2801                                              |
|          |                                                     |          |                                                     | 8.61E-01 | 9.857                                               |
|          |                                                     |          |                                                     | 9.11E-01 | 10.4222                                             |
|          |                                                     |          |                                                     | 9.61E-01 | 11.0046                                             |
|          |                                                     |          |                                                     | 9.99E-01 | 11.5466                                             |
